# Supplementary material for: Accuracy of four digital scanners according to scanning strategy in complete-arch impressions
Source: PLOS journal article supplement (doi:10.1371/journal.pone.0202916), 2018-09-13

### 3D Comparación Resultados

|                       |        |
|-----------------------|--------|
| Modelo referencia     | MRC    |
| Modelo test           | 3S2C   |
| Nº de puntos de datos | 112486 |
| # Aislados            | 115    |

|                 |               |
|-----------------|---------------|
| Tipo tolerancia | 3D desviación |
| Unidades        | u             |
| Máx. crítico    | 120.00        |
| Máx. nominal    | 20.00         |
| Mín. nominal    | -20.00        |
| Mín. crítico    | -120.00       |

|                          |               |
|--------------------------|---------------|
| Desviación               |               |
| Desviación superior máx. | 3014.88       |
| Desviación inferior máx. | -3154.62      |
| Desviación media         | 63.55 /-56.93 |
| Desviación estándar      | 201.93        |

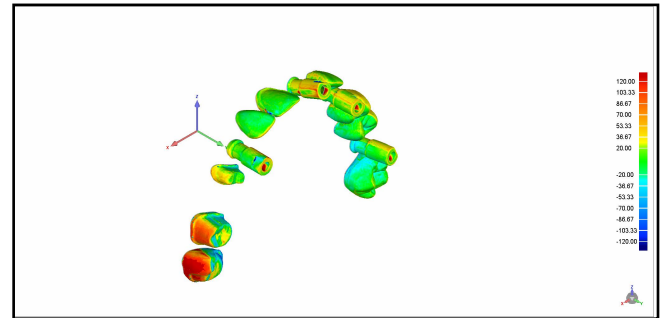

#### Distribución desviación

| >=Min   | <Max    | # Puntos | %     |
|---------|---------|----------|-------|
| -120.00 | -103.33 | 629      | 0.56  |
| -103.33 | -86.67  | 1341     | 1.19  |
| -86.67  | -70.00  | 1487     | 1.32  |
| -70.00  | -53.33  | 2033     | 1.81  |
| -53.33  | -36.67  | 3236     | 2.88  |
| -36.67  | -20.00  | 6574     | 5.84  |
| -20.00  | 20.00   | 55667    | 49.49 |
| 20.00   | 36.67   | 18145    | 16.13 |
| 36.67   | 53.33   | 7709     | 6.85  |
| 53.33   | 70.00   | 3321     | 2.95  |
| 70.00   | 86.67   | 1988     | 1.77  |
| 86.67   | 103.33  | 1719     | 1.53  |
| 103.33  | 120.00  | 1058     | 0.94  |

|                            |      |      |
|----------------------------|------|------|
| Fuera del crítico superior | 5346 | 4.75 |
| Fuera del crítico inferior | 2233 | 1.99 |

Distribución desviación

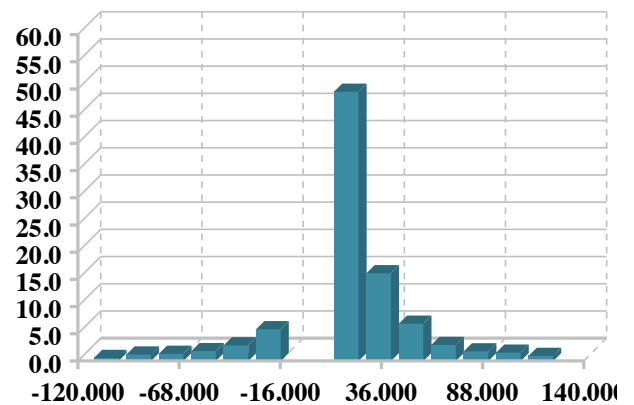

#### Desviaciones estándar

| Distribución (+/-)   | # Puntos | %     |
|----------------------|----------|-------|
| -6 * Desv. estándar. | 535      | 0.48  |
| -5 * Desv. estándar. | 88       | 0.08  |
| -4 * Desv. estándar. | 108      | 0.10  |
| -3 * Desv. estándar. | 126      | 0.11  |
| -2 * Desv. estándar. | 449      | 0.40  |
| -1 * Desv. estándar. | 72740    | 64.67 |
| 1 * Desv. estándar.  | 35448    | 31.51 |
| 2 * Desv. estándar.  | 867      | 0.77  |
| 3 * Desv. estándar.  | 441      | 0.39  |
| 4 * Desv. estándar.  | 353      | 0.31  |
| 5 * Desv. estándar.  | 367      | 0.33  |
| 6 * Desv. estándar.  | 964      | 0.86  |

Desviaciones estándar

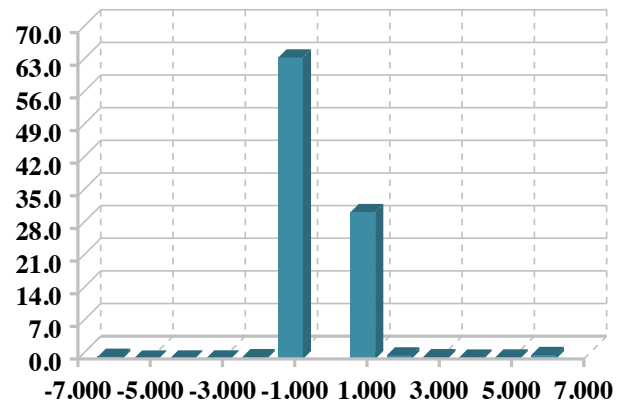

Predefinido: Isométrico

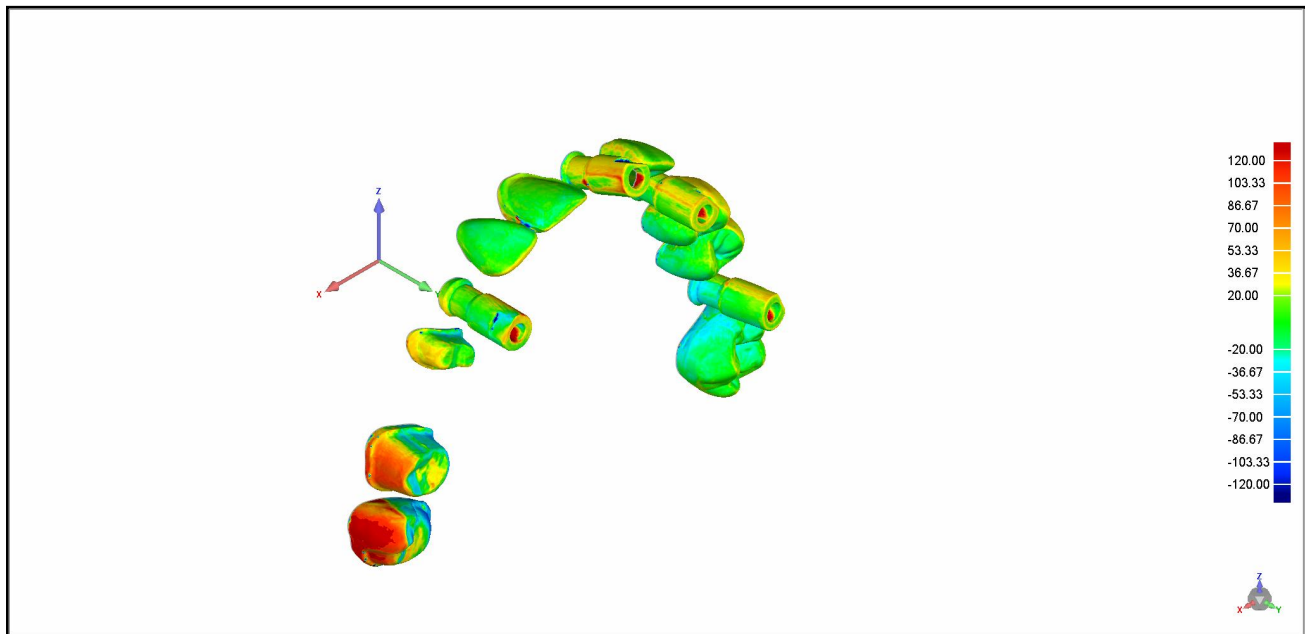

Predefinido: Frente

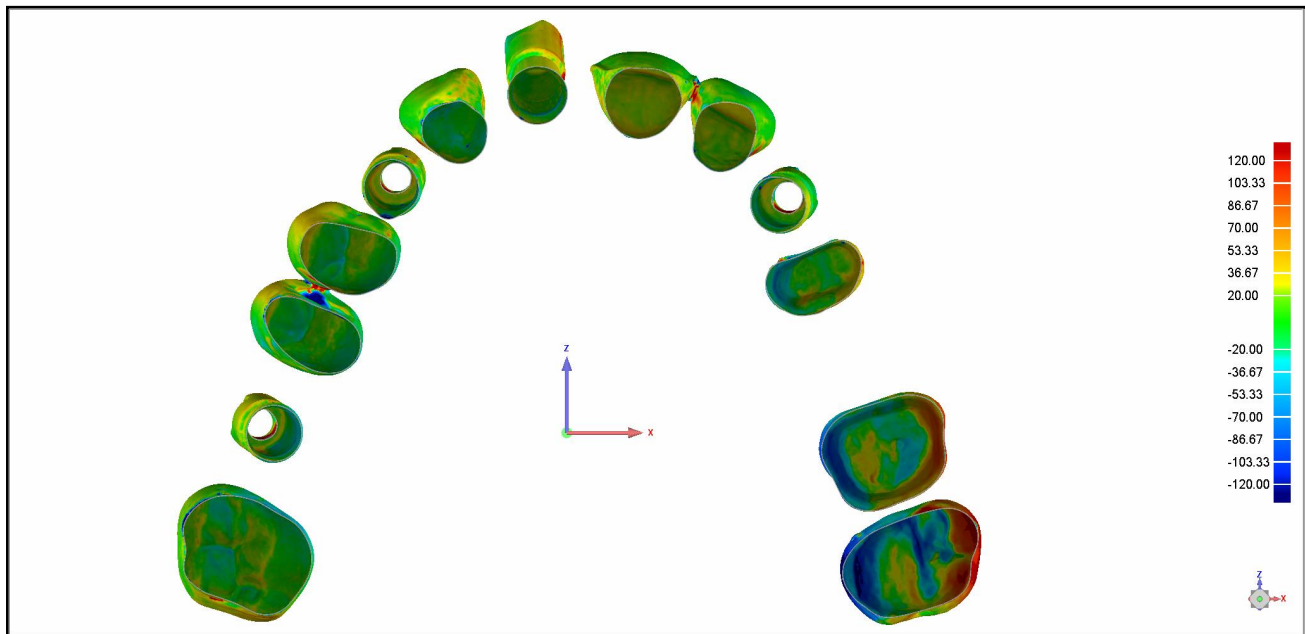

Predefinido: Atrás

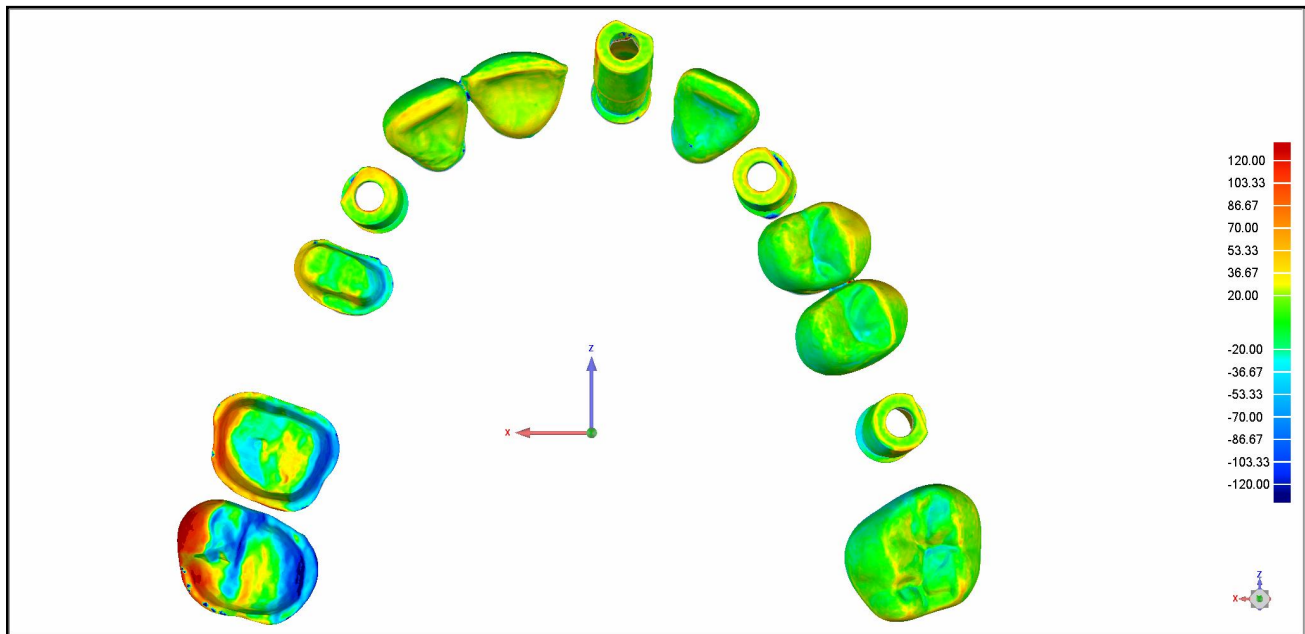

Predefinido: Izquierda

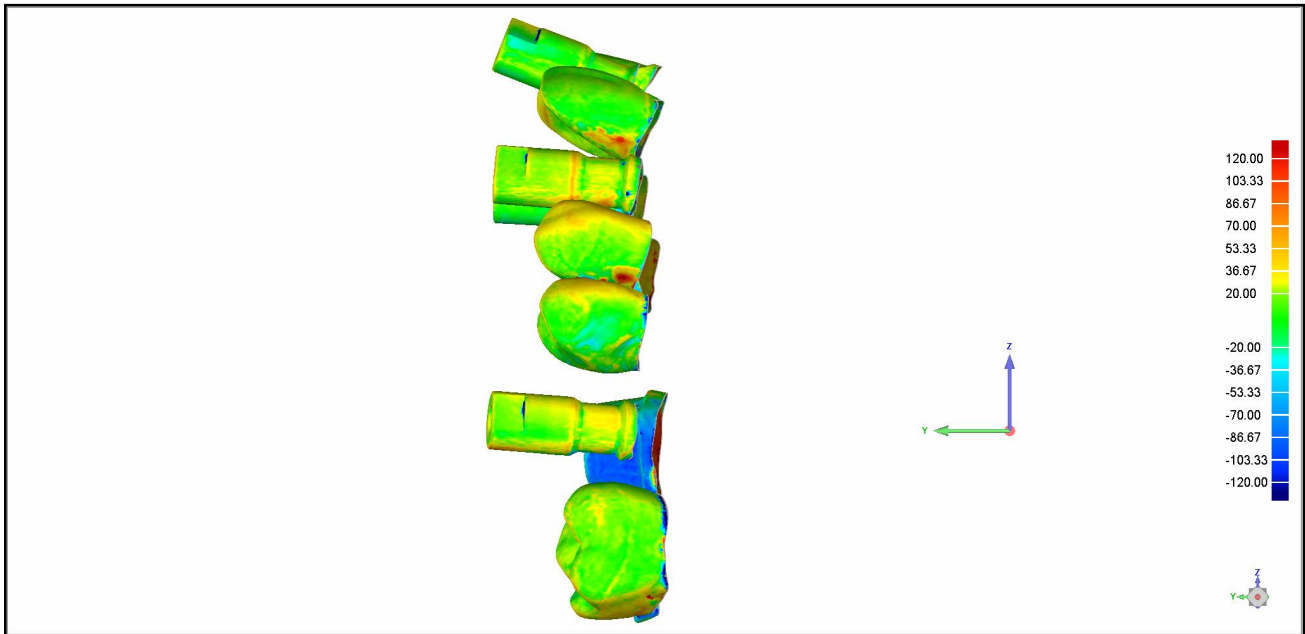

Predefinido: Derecha

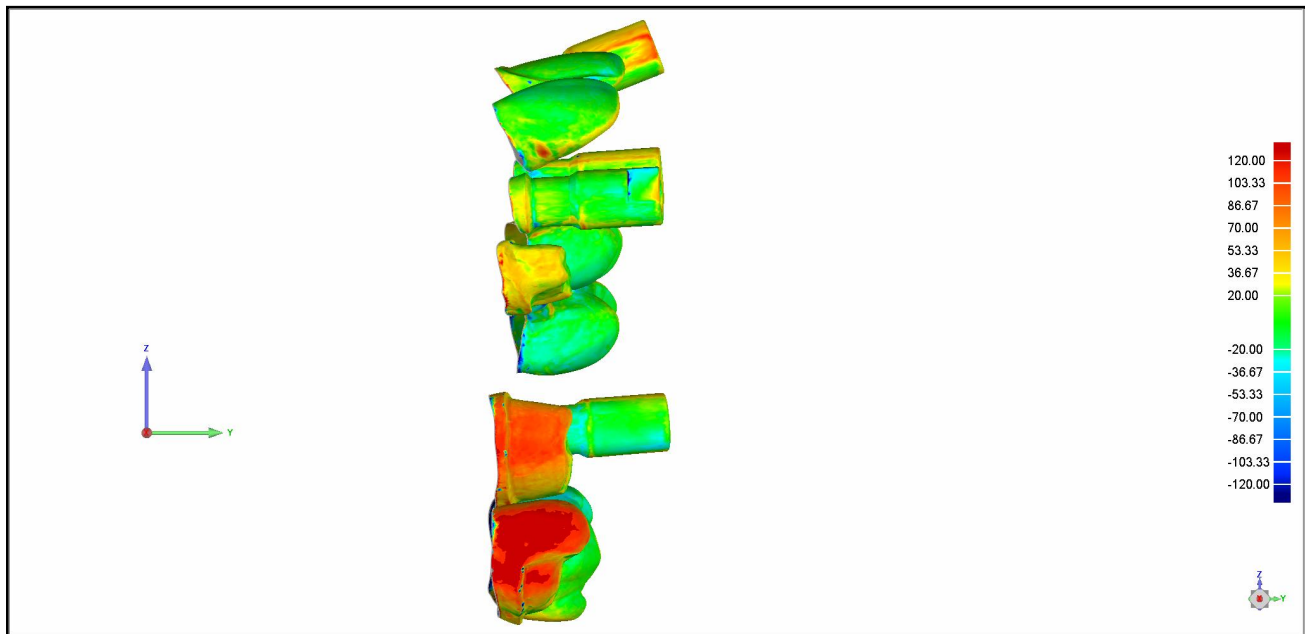

Predefinido: Superior

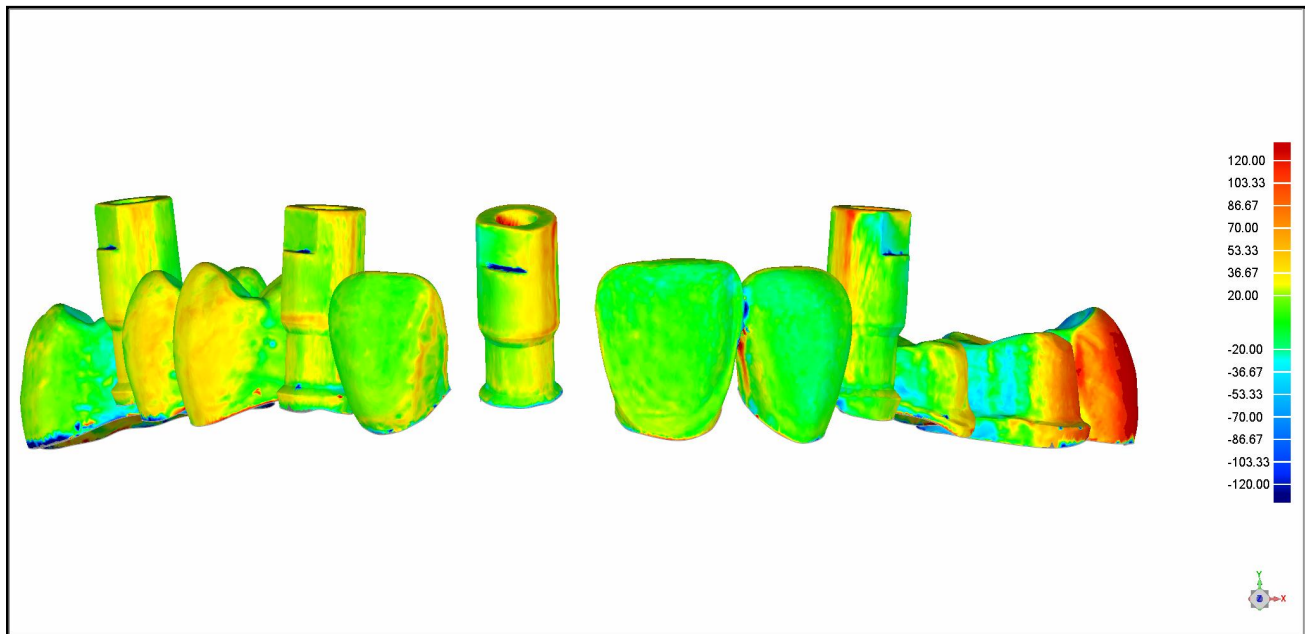

Predefinido: Inferior

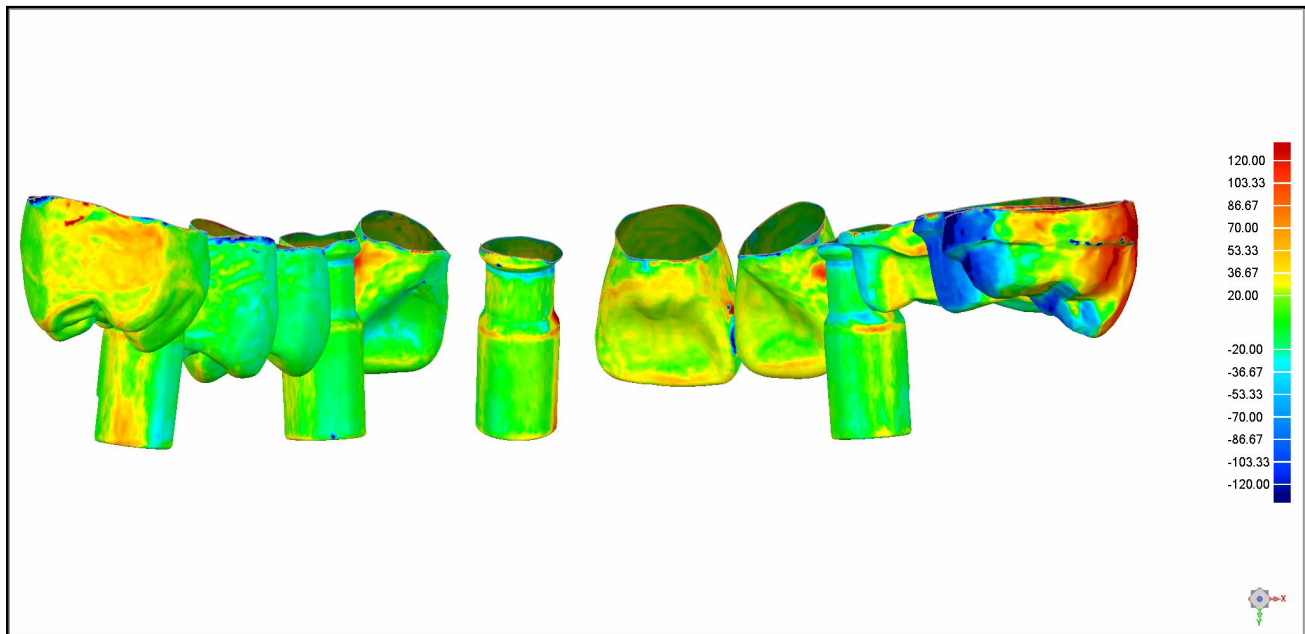

Supplement: S3 (10.1371/journal.pone.0202916.s003) [file journal.pone.0202916.s003]
