# Supplementary material for: Accuracy of four digital scanners according to scanning strategy in complete-arch impressions
Source: PLOS journal article supplement (doi:10.1371/journal.pone.0202916), 2018-09-13

### 3D Comparación Resultados

|                       |        |
|-----------------------|--------|
| Modelo referencia     | MRC    |
| Modelo test           | 3S8C   |
| Nº de puntos de datos | 107434 |
| # Aislados            | 132    |

|                 |               |
|-----------------|---------------|
| Tipo tolerancia | 3D desviación |
| Unidades        | u             |
| Máx. crítico    | 120.00        |
| Máx. nominal    | 13.00         |
| Mín. nominal    | -13.00        |
| Mín. crítico    | -120.00       |

|                          |               |
|--------------------------|---------------|
| Desviación               |               |
| Desviación superior máx. | 3110.88       |
| Desviación inferior máx. | -3106.42      |
| Desviación media         | 61.74 /-51.23 |
| Desviación estándar      | 196.19        |

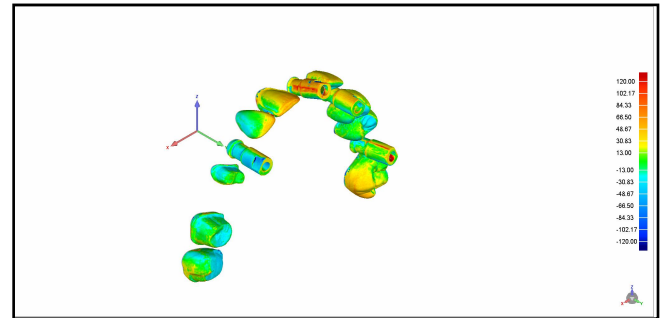

#### Distribución desviación

| >=Min   | <Max    | # Puntos | %     |
|---------|---------|----------|-------|
| -120.00 | -102.17 | 333      | 0.31  |
| -102.17 | -84.33  | 433      | 0.40  |
| -84.33  | -66.50  | 746      | 0.69  |
| -66.50  | -48.67  | 1881     | 1.75  |
| -48.67  | -30.83  | 6675     | 6.21  |
| -30.83  | -13.00  | 16067    | 14.96 |
| -13.00  | 13.00   | 36359    | 33.84 |
| 13.00   | 30.83   | 20667    | 19.24 |
| 30.83   | 48.67   | 10424    | 9.70  |
| 48.67   | 66.50   | 4607     | 4.29  |
| 66.50   | 84.33   | 1789     | 1.67  |
| 84.33   | 102.17  | 861      | 0.80  |
| 102.17  | 120.00  | 541      | 0.50  |

|                            |      |      |
|----------------------------|------|------|
| Fuera del crítico superior | 3772 | 3.51 |
| Fuera del crítico inferior | 2279 | 2.12 |

Distribución desviación

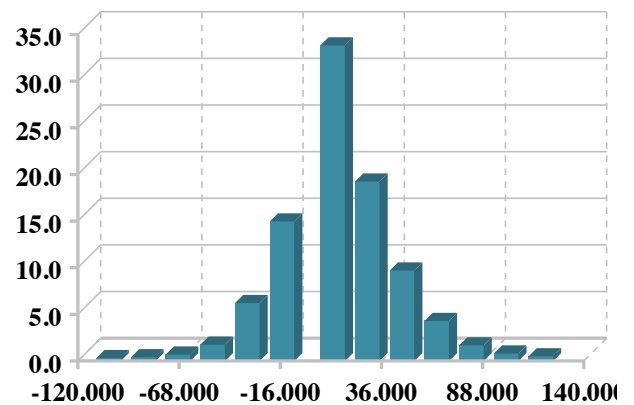

#### Desviaciones estándar

| Distribución (+/-)   | # Puntos | %     |
|----------------------|----------|-------|
| -6 * Desv. estándar. | 619      | 0.58  |
| -5 * Desv. estándar. | 106      | 0.10  |
| -4 * Desv. estándar. | 141      | 0.13  |
| -3 * Desv. estándar. | 185      | 0.17  |
| -2 * Desv. estándar. | 498      | 0.46  |
| -1 * Desv. estándar. | 64090    | 59.66 |
| 1 * Desv. estándar.  | 39175    | 36.46 |
| 2 * Desv. estándar.  | 666      | 0.62  |
| 3 * Desv. estándar.  | 379      | 0.35  |
| 4 * Desv. estándar.  | 387      | 0.36  |
| 5 * Desv. estándar.  | 344      | 0.32  |
| 6 * Desv. estándar.  | 844      | 0.79  |

Desviaciones estándar

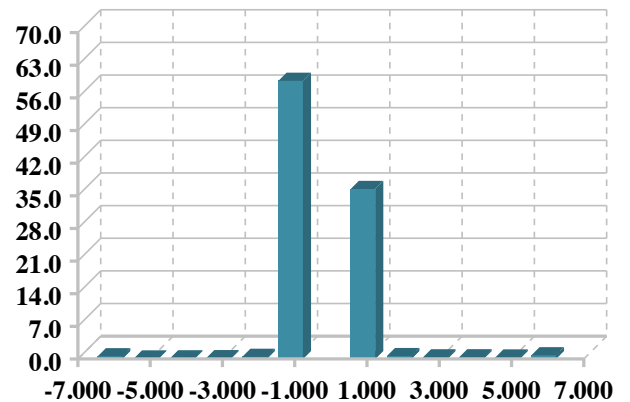

Predefinido: Isométrico

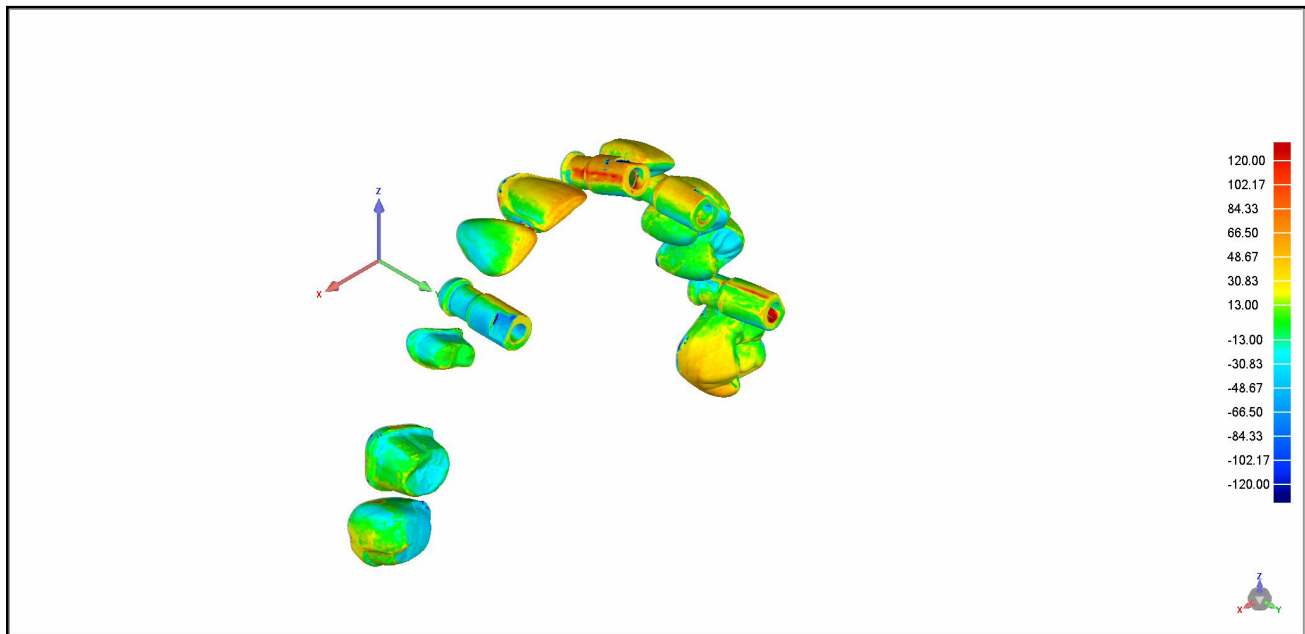

Predefinido: Frente

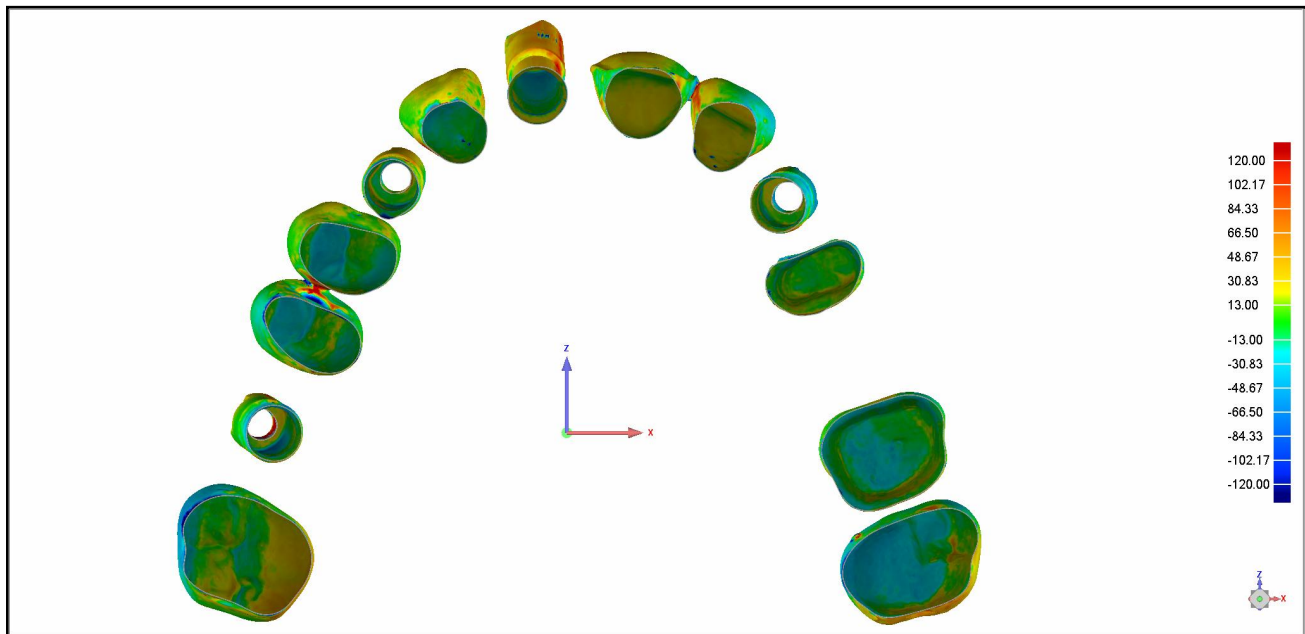

Predefinido: Atrás

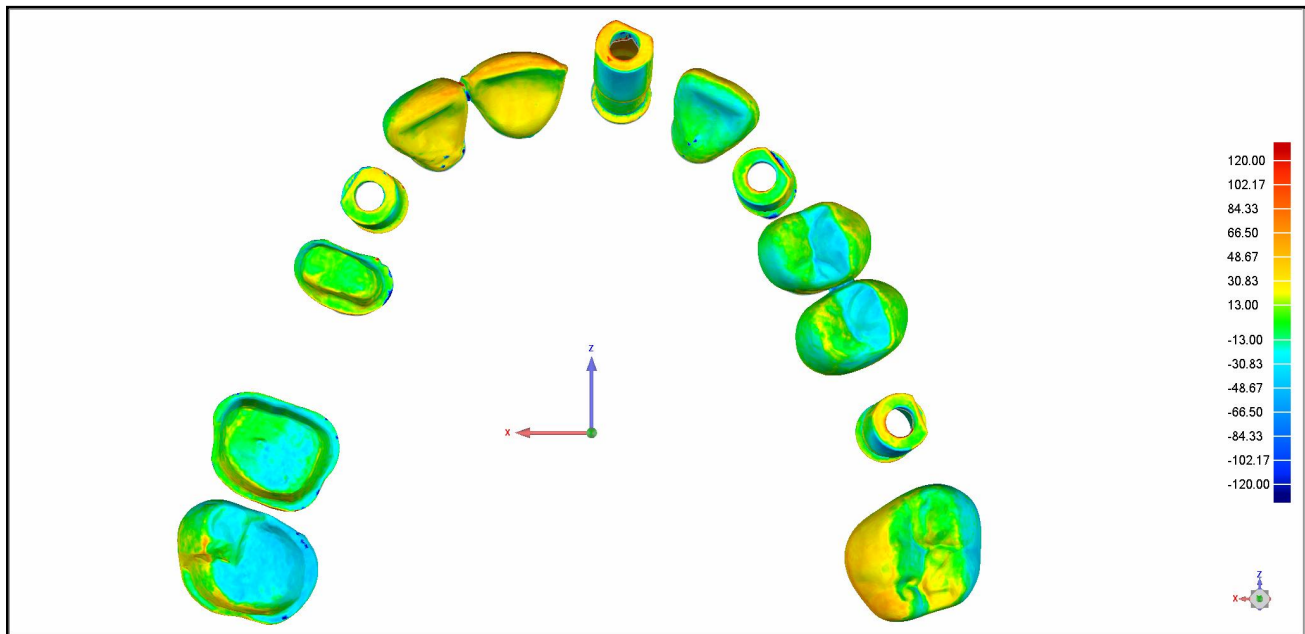

Predefinido: Izquierda

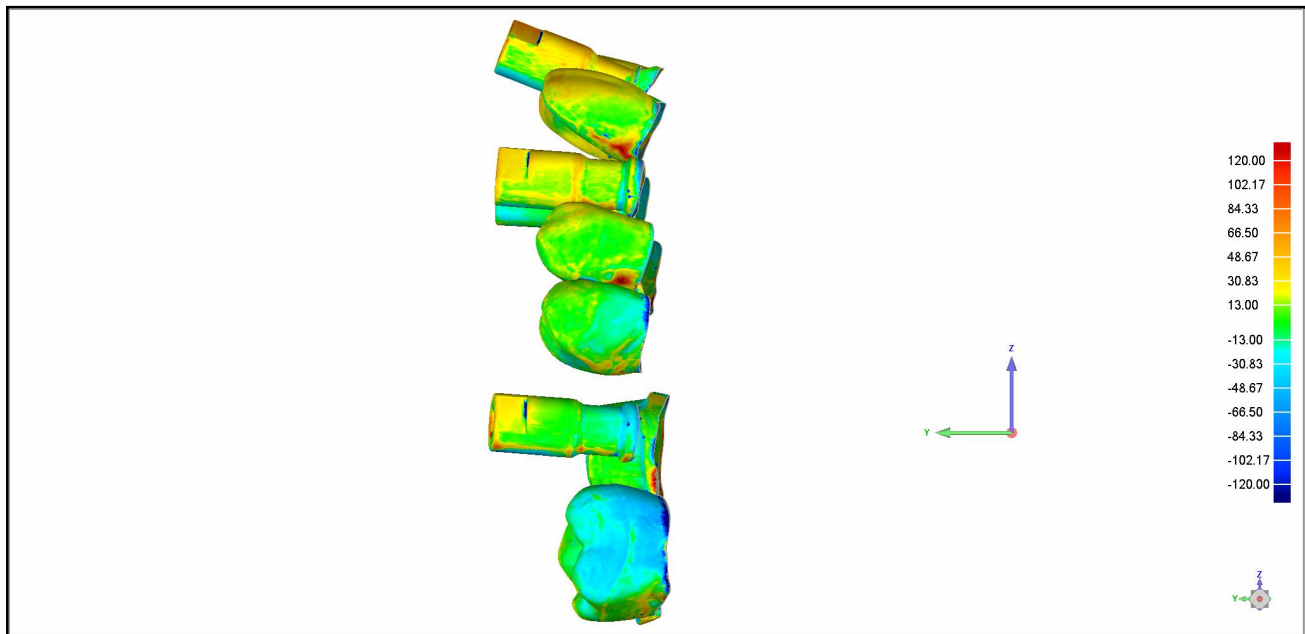

Predefinido: Derecha

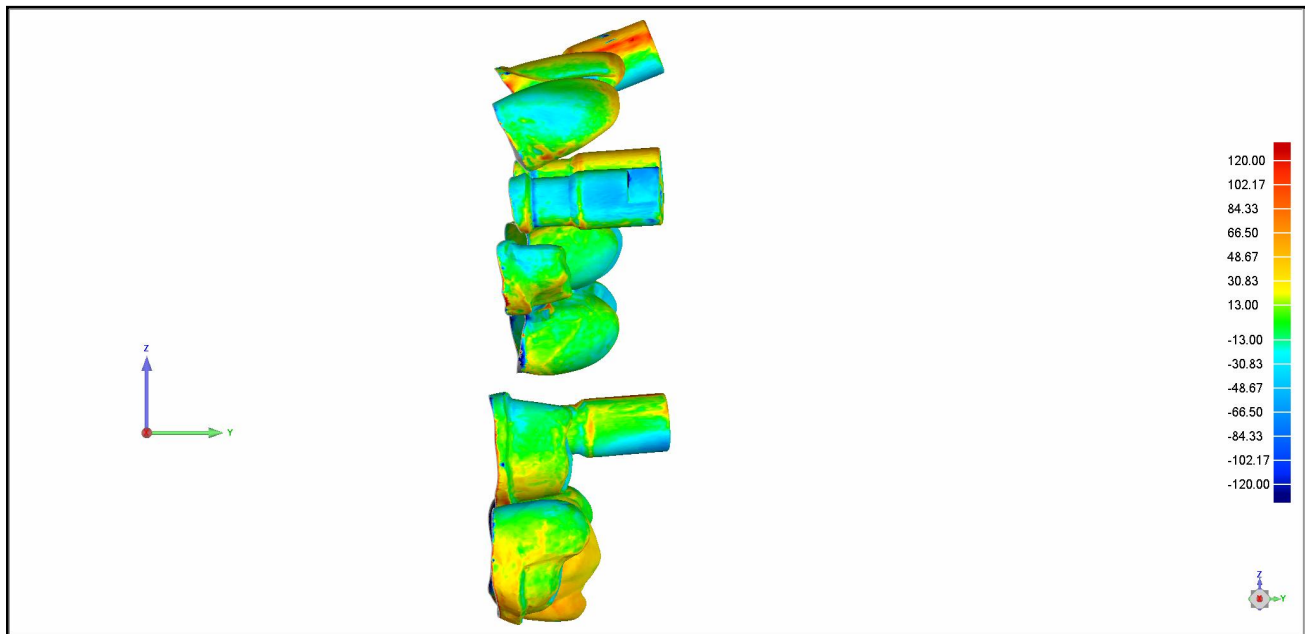

Predefinido: Superior

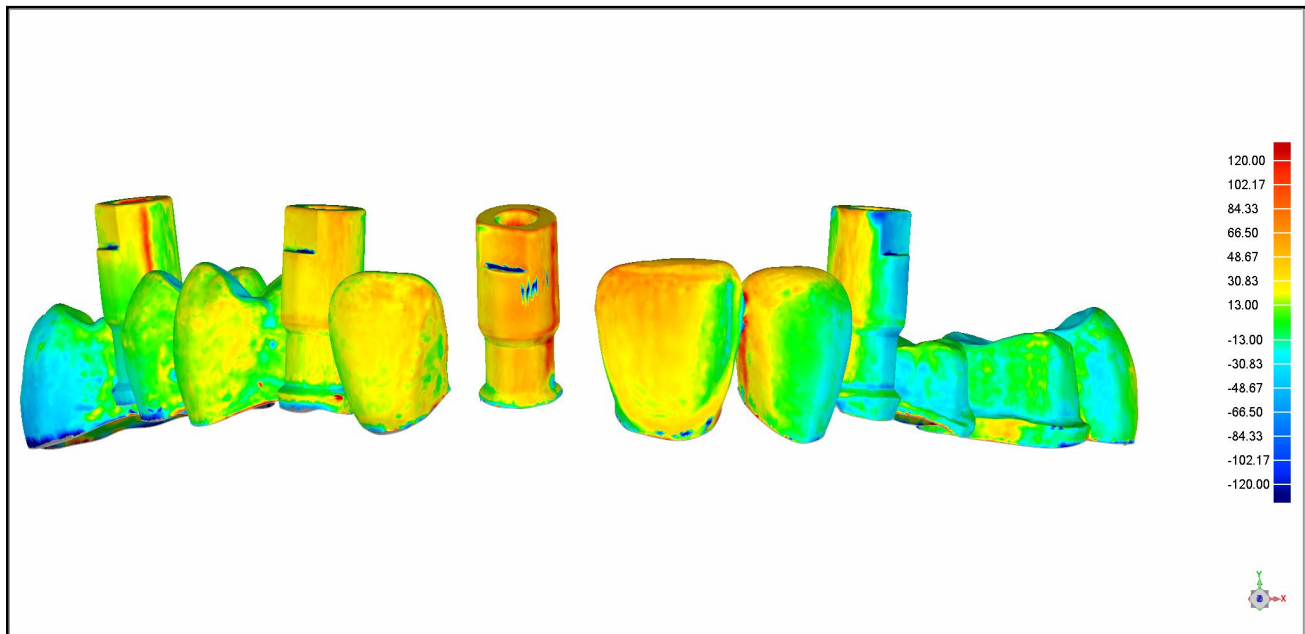

Predefinido: Inferior

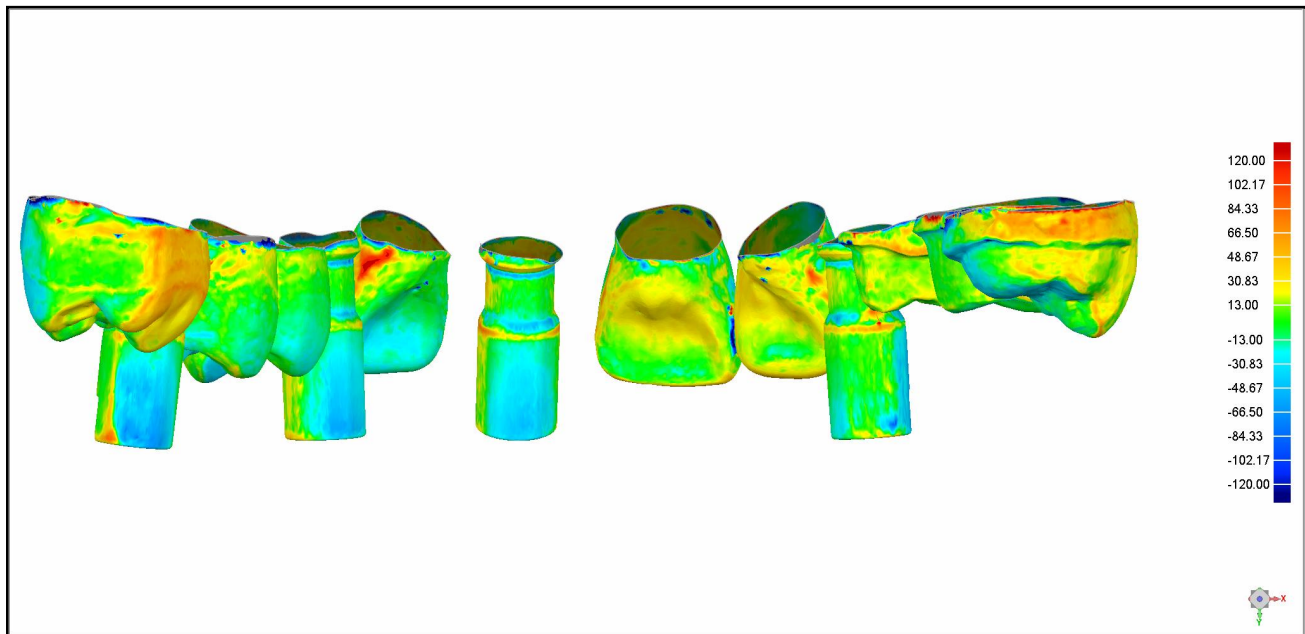

Supplement: S3 (10.1371/journal.pone.0202916.s003) [file journal.pone.0202916.s003]
