# Supplementary material for: Accuracy of four digital scanners according to scanning strategy in complete-arch impressions
Source: PLOS journal article supplement (doi:10.1371/journal.pone.0202916), 2018-09-13

### 3D Comparación Resultados

|                       |        |
|-----------------------|--------|
| Modelo referencia     | MRC    |
| Modelo test           | 3S9C   |
| Nº de puntos de datos | 106246 |
| # Aislados            | 63     |

|                 |               |
|-----------------|---------------|
| Tipo tolerancia | 3D desviación |
| Unidades        | u             |
| Máx. crítico    | 120.00        |
| Máx. nominal    | 17.00         |
| Mín. nominal    | -17.00        |
| Mín. crítico    | -120.00       |

|                          |                |
|--------------------------|----------------|
| Desviación               |                |
| Desviación superior máx. | 3153.61        |
| Desviación inferior máx. | -3155.89       |
| Desviación media         | 59.81 / -42.95 |
| Desviación estándar      | 190.14         |

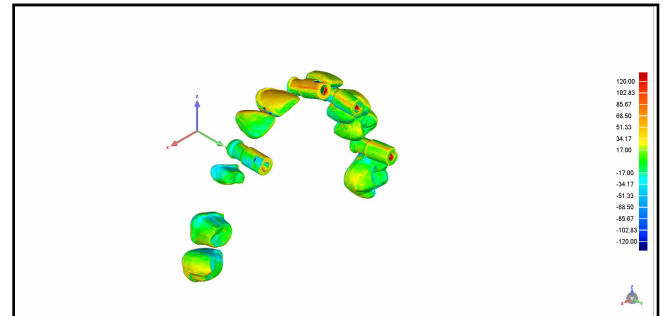

#### Distribución desviación

| >=Min   | <Max    | # Puntos | %     |
|---------|---------|----------|-------|
| -120.00 | -102.83 | 279      | 0.26  |
| -102.83 | -85.67  | 384      | 0.36  |
| -85.67  | -68.50  | 498      | 0.47  |
| -68.50  | -51.33  | 843      | 0.79  |
| -51.33  | -34.17  | 2970     | 2.80  |
| -34.17  | -17.00  | 11651    | 10.97 |
| -17.00  | 17.00   | 52000    | 48.94 |
| 17.00   | 34.17   | 18288    | 17.21 |
| 34.17   | 51.33   | 7972     | 7.50  |
| 51.33   | 68.50   | 3324     | 3.13  |
| 68.50   | 85.67   | 1285     | 1.21  |
| 85.67   | 102.83  | 634      | 0.60  |
| 102.83  | 120.00  | 402      | 0.38  |

|                            |      |      |
|----------------------------|------|------|
| Fuera del crítico superior | 3836 | 3.61 |
| Fuera del crítico inferior | 1880 | 1.77 |

Distribución desviación

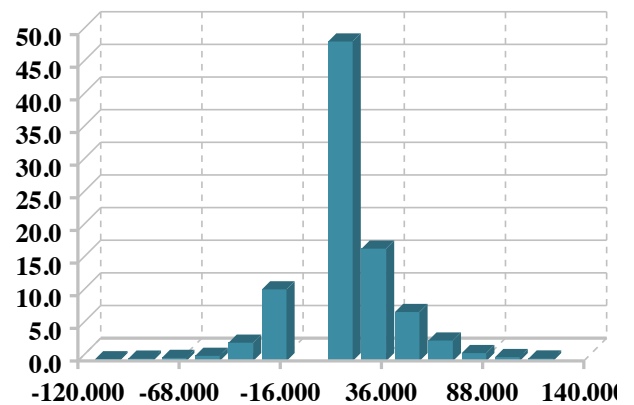

#### Desviaciones estándar

| Distribución (+/-)   | # Puntos | %     |
|----------------------|----------|-------|
| -6 * Desv. estándar. | 456      | 0.43  |
| -5 * Desv. estándar. | 92       | 0.09  |
| -4 * Desv. estándar. | 123      | 0.12  |
| -3 * Desv. estándar. | 146      | 0.14  |
| -2 * Desv. estándar. | 515      | 0.48  |
| -1 * Desv. estándar. | 70485    | 66.34 |
| 1 * Desv. estándar.  | 31751    | 29.88 |
| 2 * Desv. estándar.  | 761      | 0.72  |
| 3 * Desv. estándar.  | 347      | 0.33  |
| 4 * Desv. estándar.  | 314      | 0.30  |
| 5 * Desv. estándar.  | 292      | 0.27  |
| 6 * Desv. estándar.  | 964      | 0.91  |

Desviaciones estándar

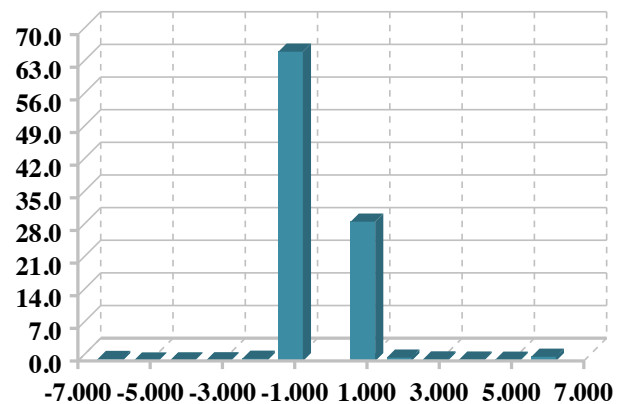

Predefinido: Isométrico

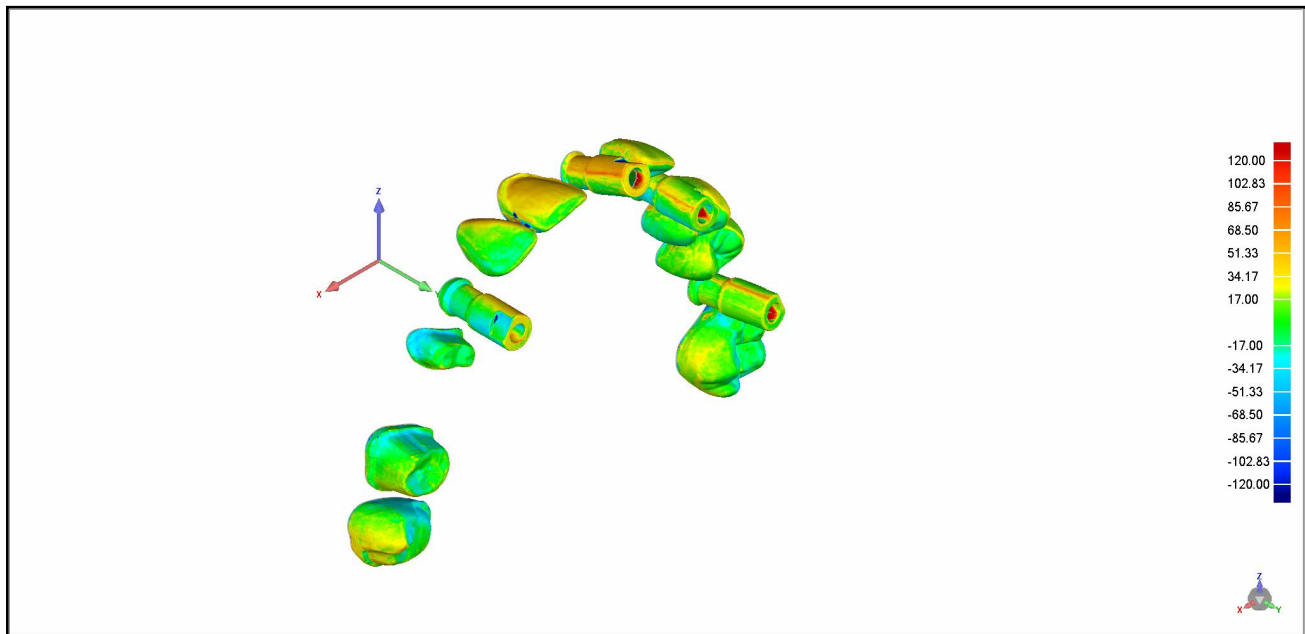

Predefinido: Frente

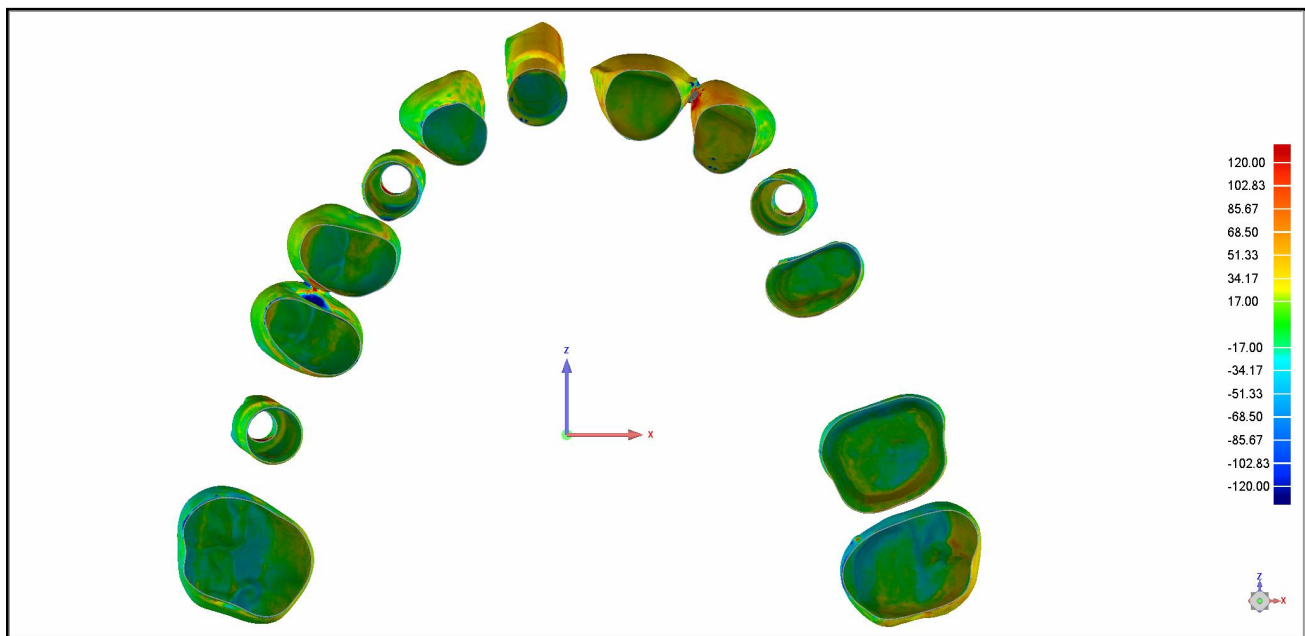

Predefinido: Atrás

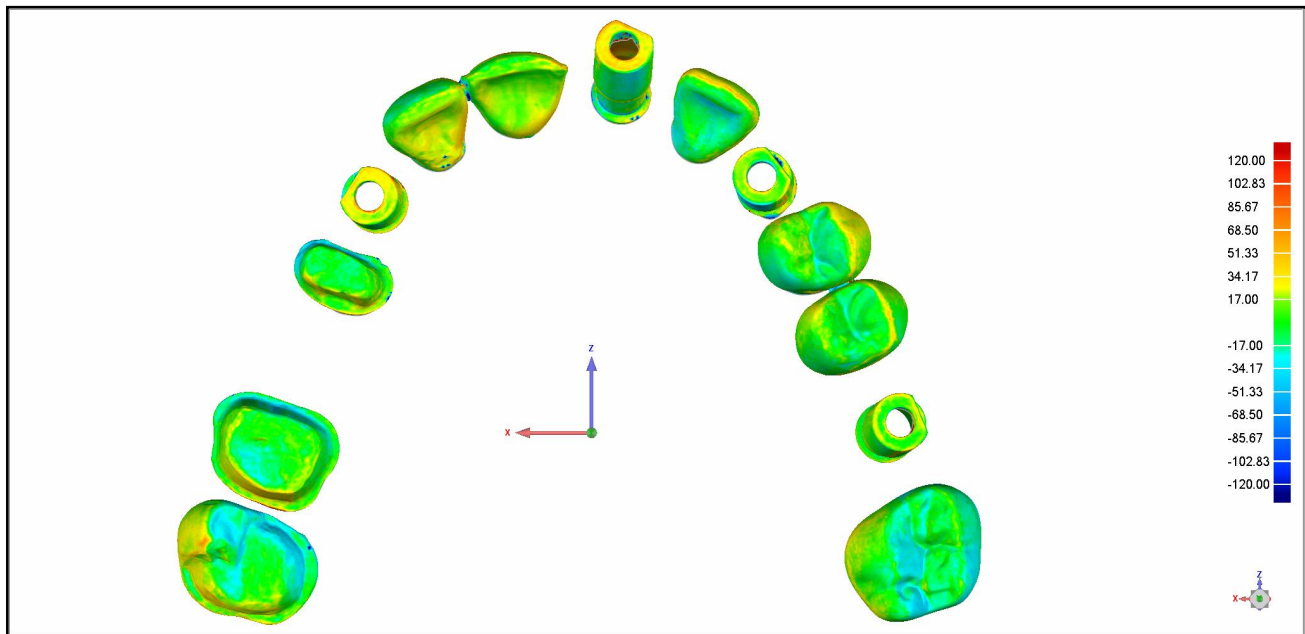

Predefinido: Izquierda

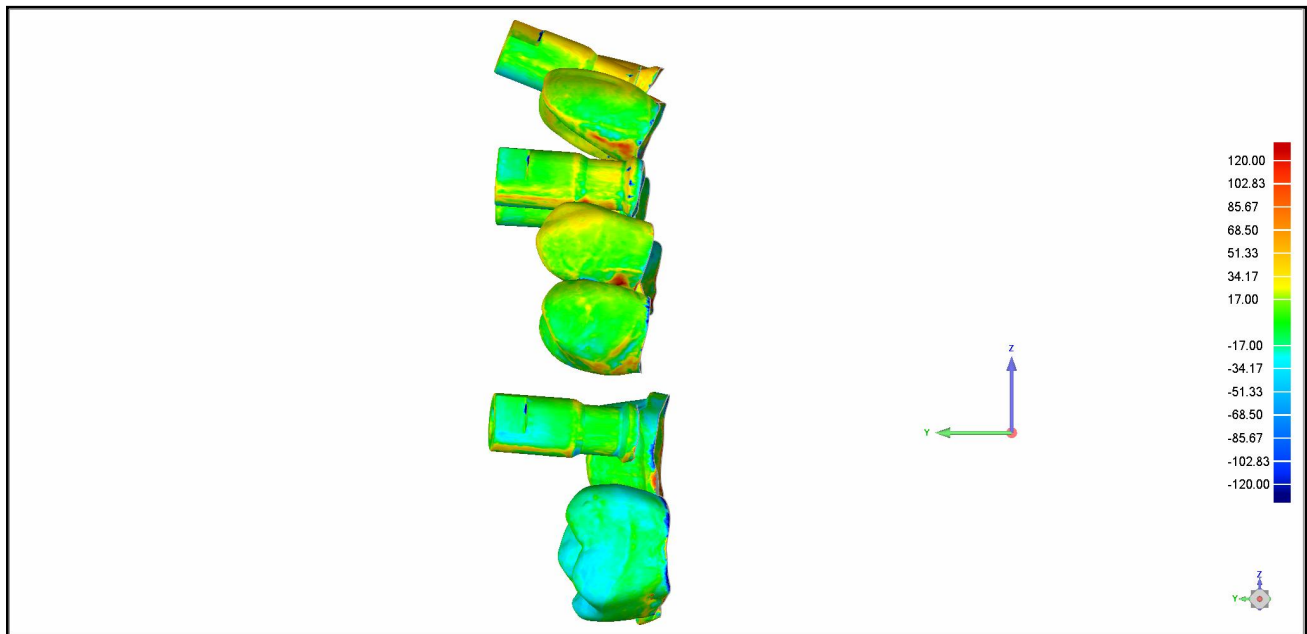

Predefinido: Derecha

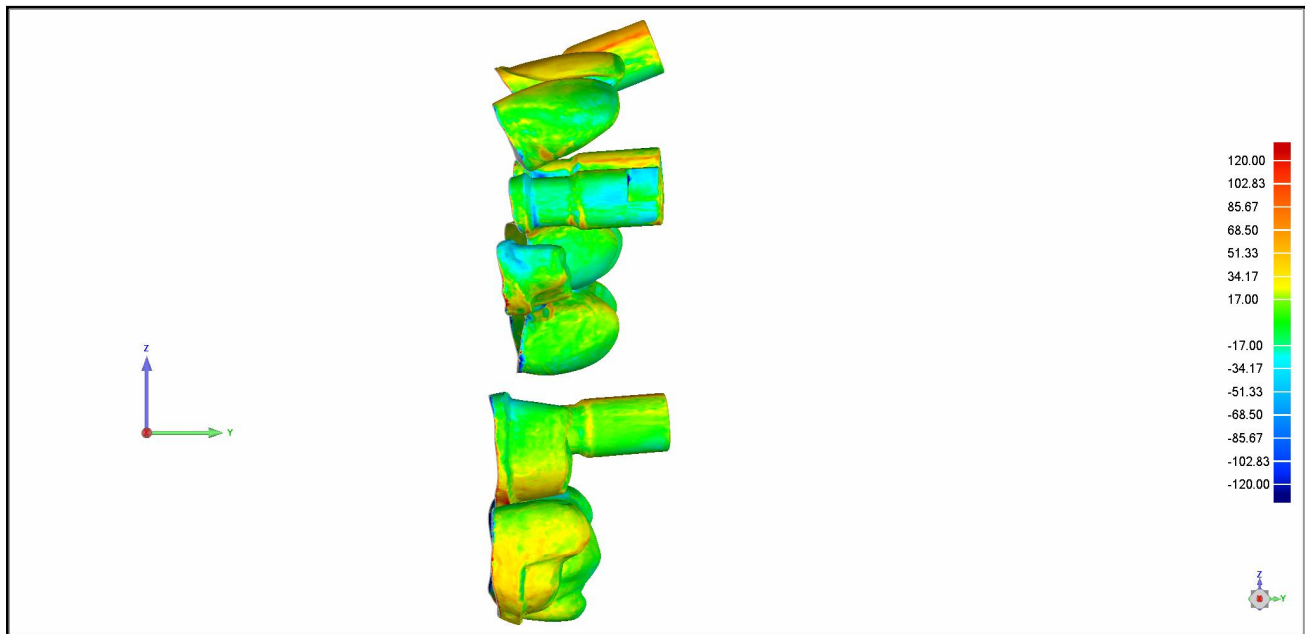

Predefinido: Superior

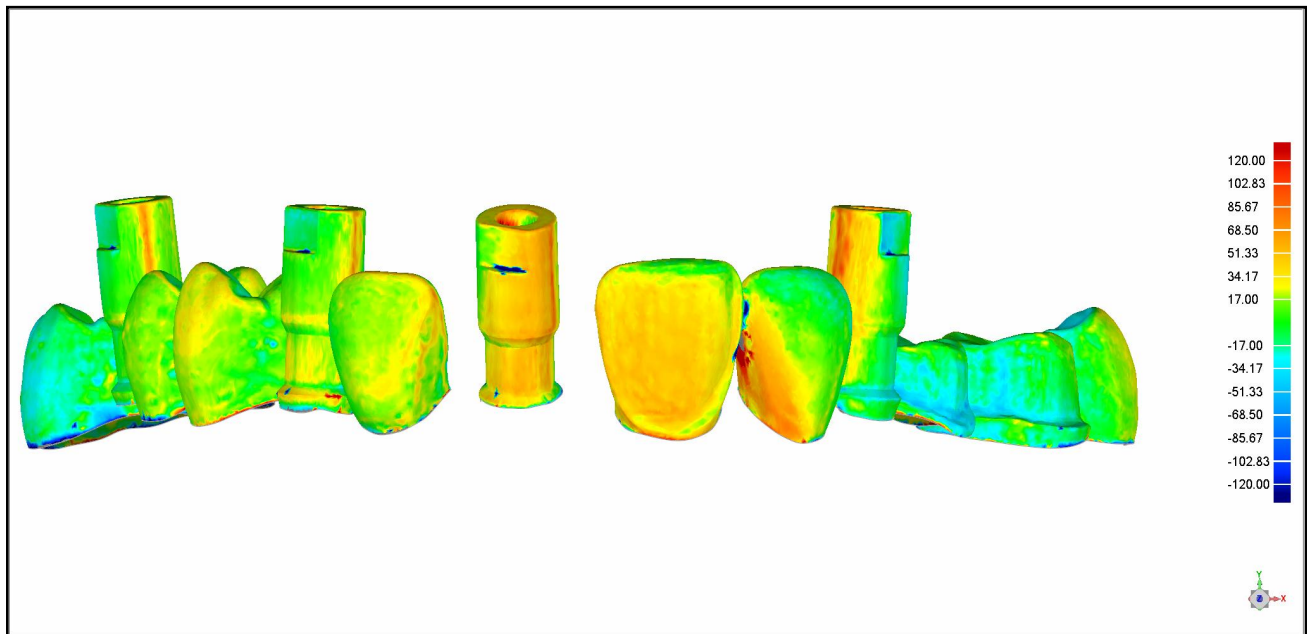

Predefinido: Inferior

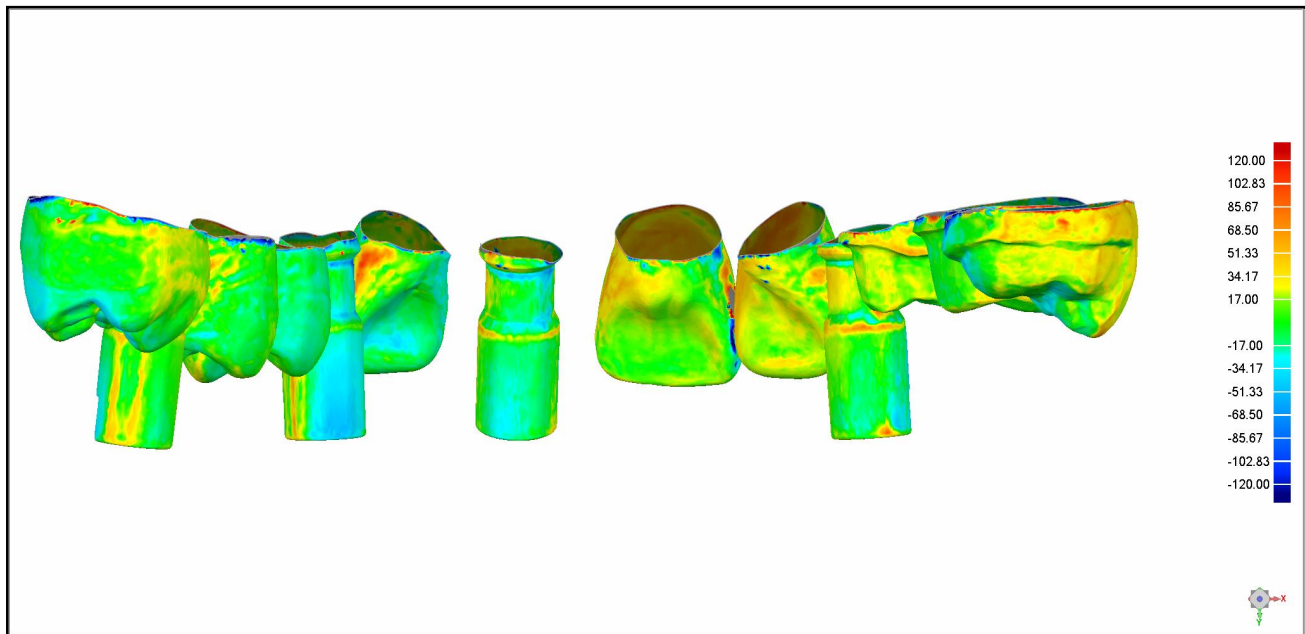

Supplement: S3 (10.1371/journal.pone.0202916.s003) [file journal.pone.0202916.s003]
