# Supplementary material for: Accuracy of four digital scanners according to scanning strategy in complete-arch impressions
Source: PLOS journal article supplement (doi:10.1371/journal.pone.0202916), 2018-09-13

### 3D Comparación Resultados

|                       |       |
|-----------------------|-------|
| Modelo referencia     | MRC   |
| Modelo test           | 3S4C  |
| Nº de puntos de datos | 98135 |
| # Aislados            | 82    |

|                 |               |
|-----------------|---------------|
| Tipo tolerancia | 3D desviación |
| Unidades        | u             |
| Máx. crítico    | 120.00        |
| Máx. nominal    | 18.00         |
| Mín. nominal    | -18.00        |
| Mín. crítico    | -120.00       |

|                          |                |
|--------------------------|----------------|
| Desviación               |                |
| Desviación superior máx. | 3153.79        |
| Desviación inferior máx. | -3123.78       |
| Desviación media         | 55.38 / -50.21 |
| Desviación estándar      | 175.21         |

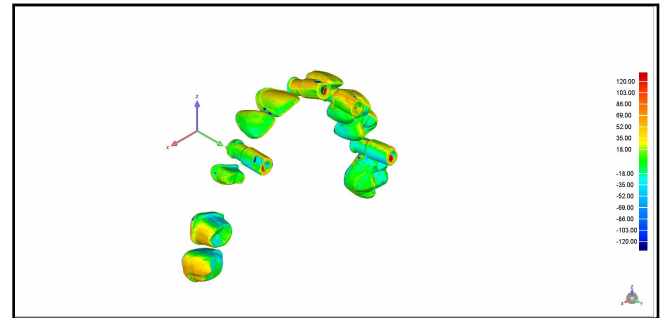

#### Distribución desviación

| >=Min   | <Max    | # Puntos | %     |
|---------|---------|----------|-------|
| -120.00 | -103.00 | 293      | 0.30  |
| -103.00 | -86.00  | 377      | 0.38  |
| -86.00  | -69.00  | 563      | 0.57  |
| -69.00  | -52.00  | 1153     | 1.17  |
| -52.00  | -35.00  | 3220     | 3.28  |
| -35.00  | -18.00  | 8276     | 8.43  |
| -18.00  | 18.00   | 43450    | 44.28 |
| 18.00   | 35.00   | 19977    | 20.36 |
| 35.00   | 52.00   | 9248     | 9.42  |
| 52.00   | 69.00   | 3379     | 3.44  |
| 69.00   | 86.00   | 1306     | 1.33  |
| 86.00   | 103.00  | 709      | 0.72  |
| 103.00  | 120.00  | 493      | 0.50  |

|                            |      |      |
|----------------------------|------|------|
| Fuera del crítico superior | 3695 | 3.77 |
| Fuera del crítico inferior | 1996 | 2.03 |

Distribución desviación

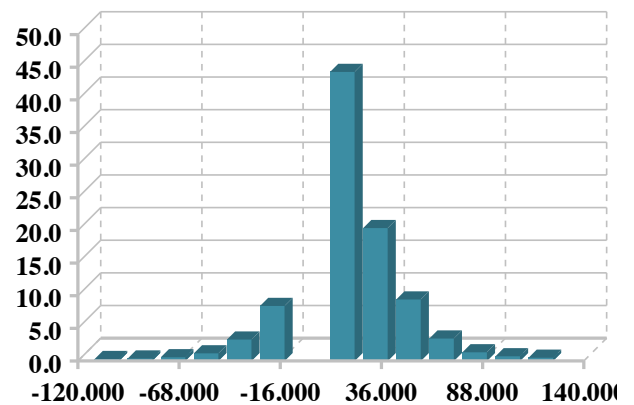

#### Desviaciones estándar

| Distribución (+/-)   | # Puntos | %     |
|----------------------|----------|-------|
| -6 * Desv. estándar. | 462      | 0.47  |
| -5 * Desv. estándar. | 89       | 0.09  |
| -4 * Desv. estándar. | 108      | 0.11  |
| -3 * Desv. estándar. | 173      | 0.18  |
| -2 * Desv. estándar. | 701      | 0.71  |
| -1 * Desv. estándar. | 58682    | 59.80 |
| 1 * Desv. estándar.  | 35269    | 35.94 |
| 2 * Desv. estándar.  | 916      | 0.93  |
| 3 * Desv. estándar.  | 394      | 0.40  |
| 4 * Desv. estándar.  | 280      | 0.29  |
| 5 * Desv. estándar.  | 250      | 0.25  |
| 6 * Desv. estándar.  | 811      | 0.83  |

Desviaciones estándar

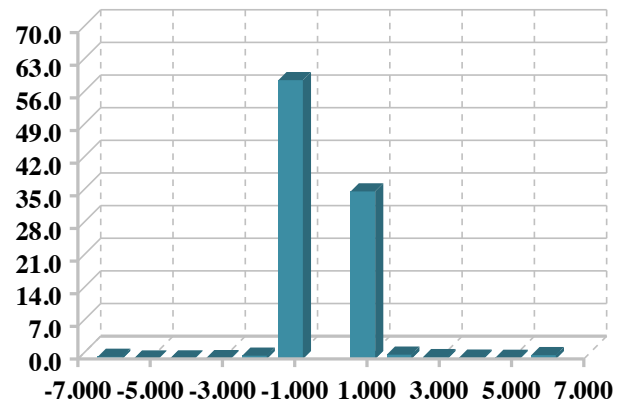

Predefinido: Isométrico

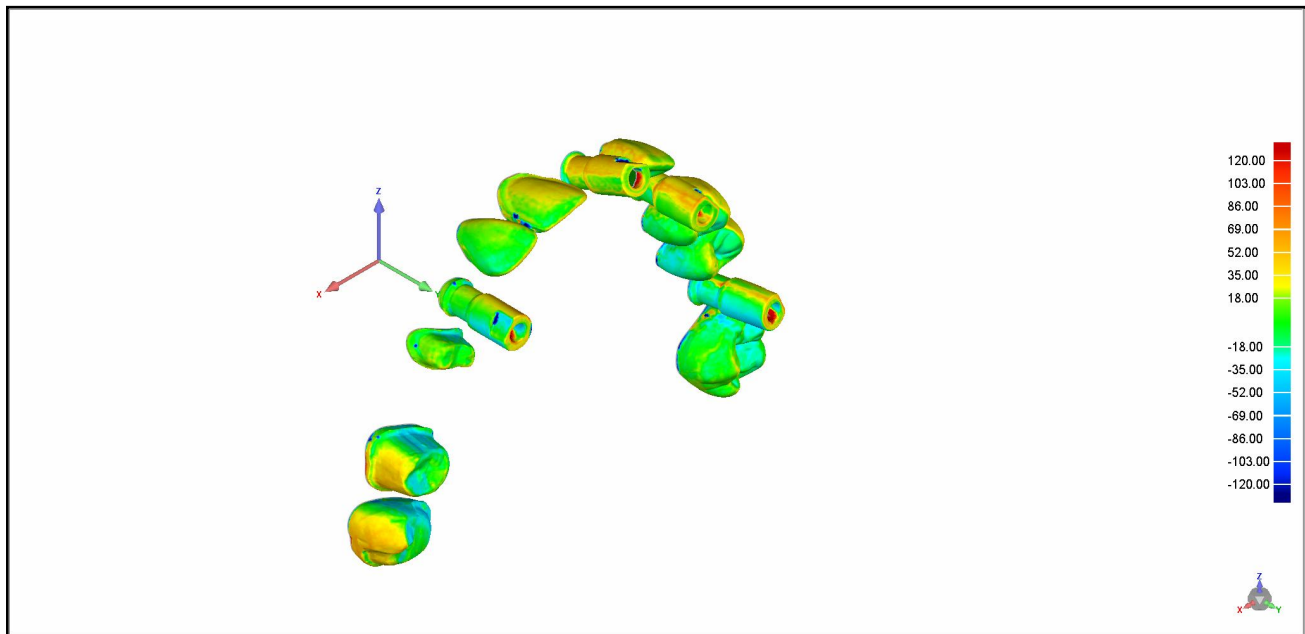

Predefinido: Frente

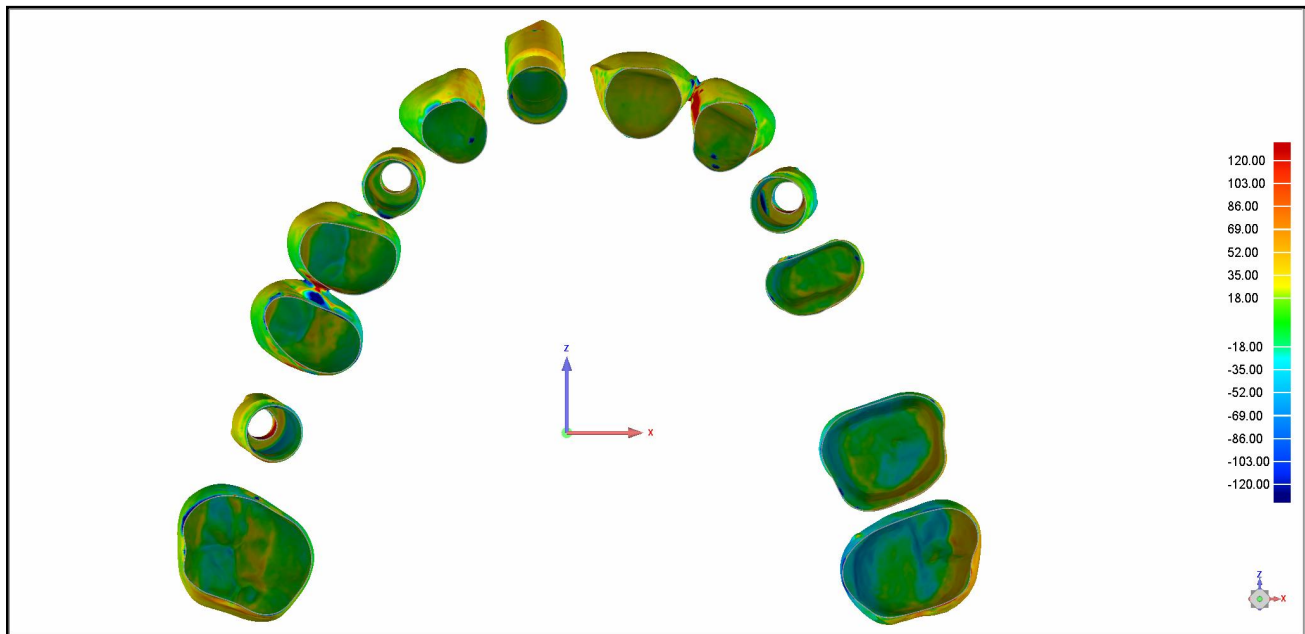

Predefinido: Atrás

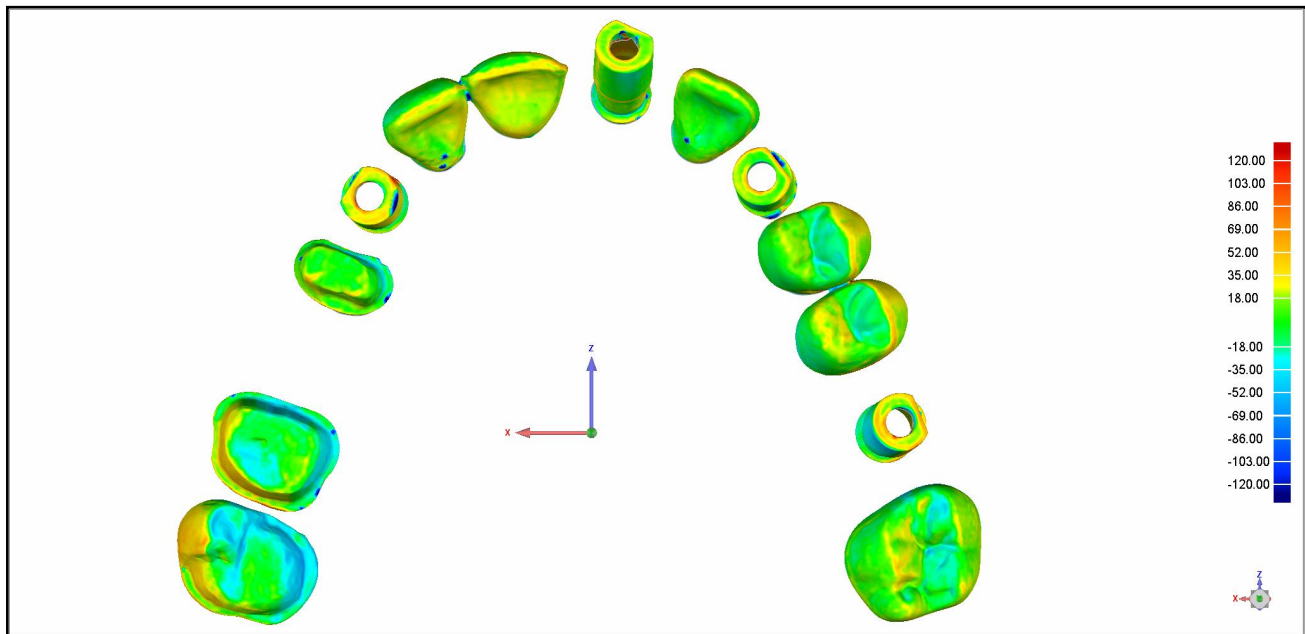

Predefinido: Izquierda

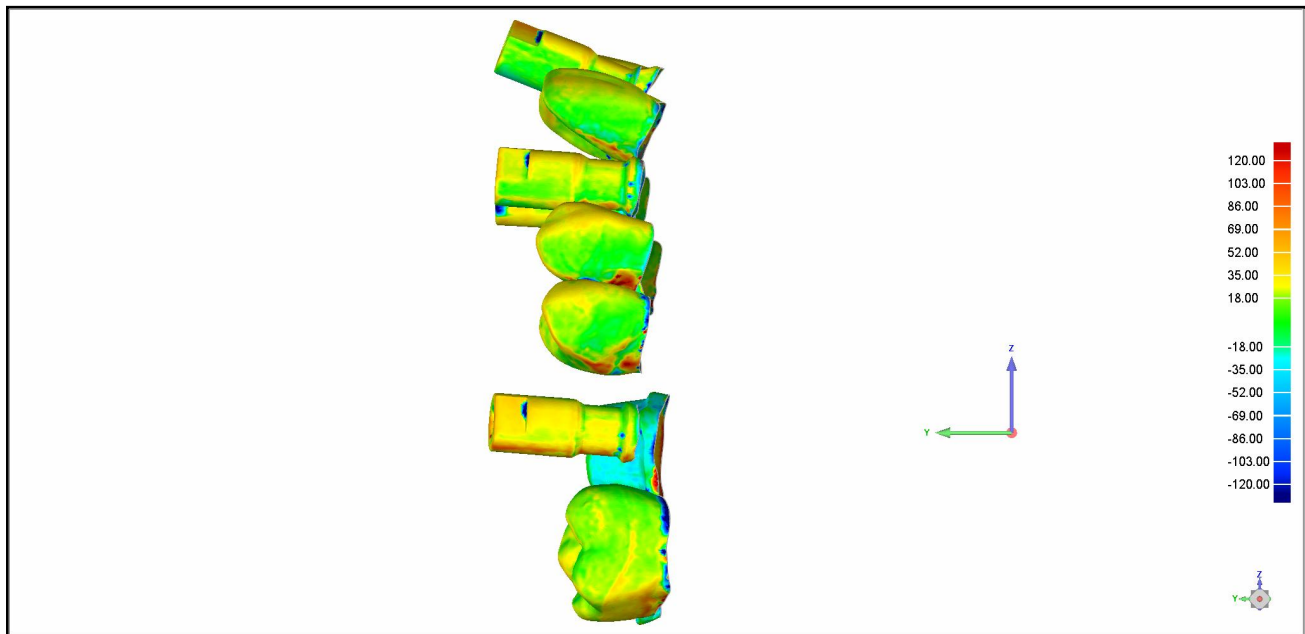

Predefinido: Derecha

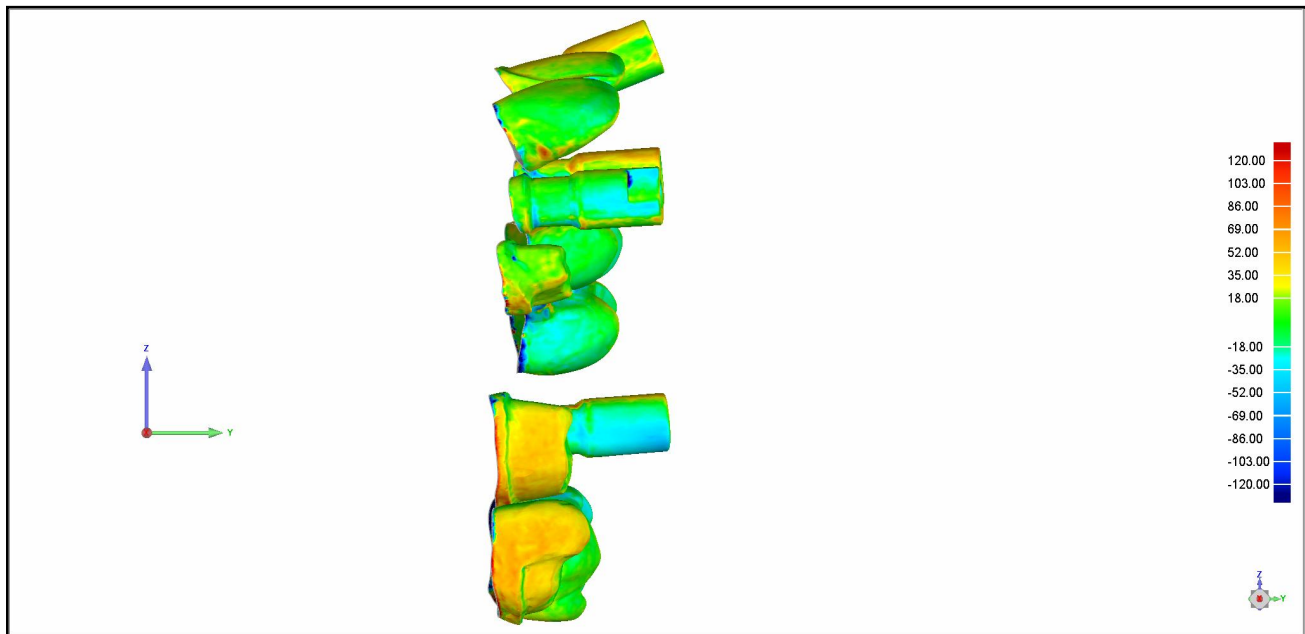

Predefinido: Superior

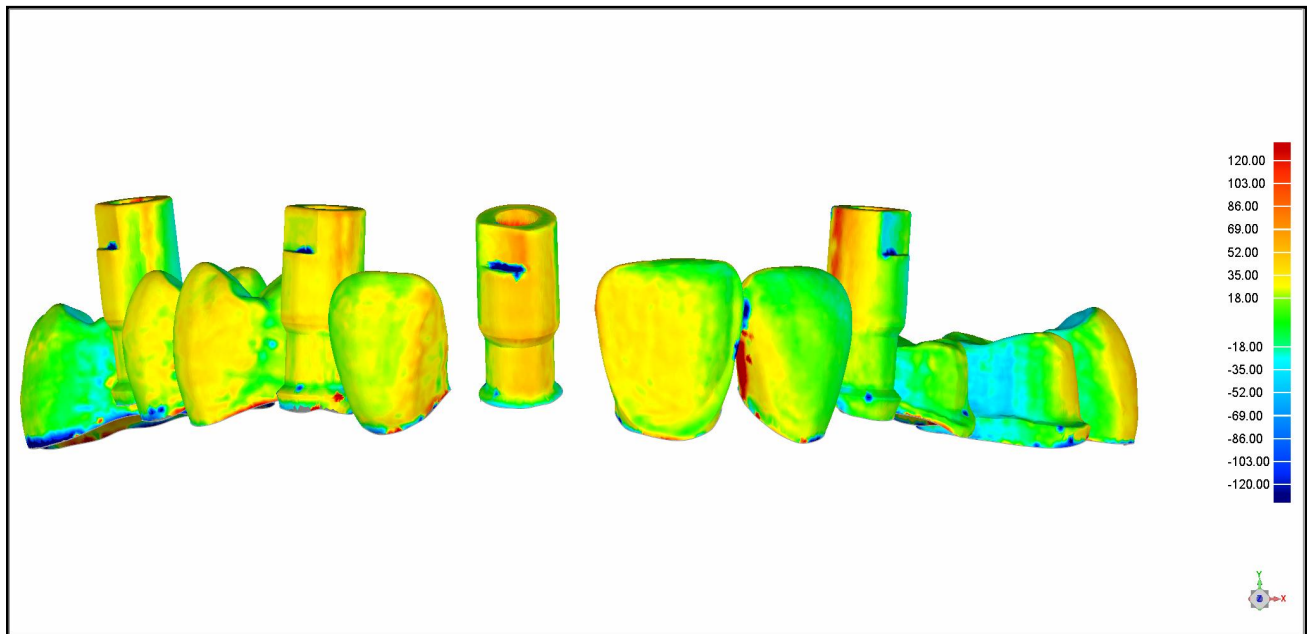

Predefinido: Inferior

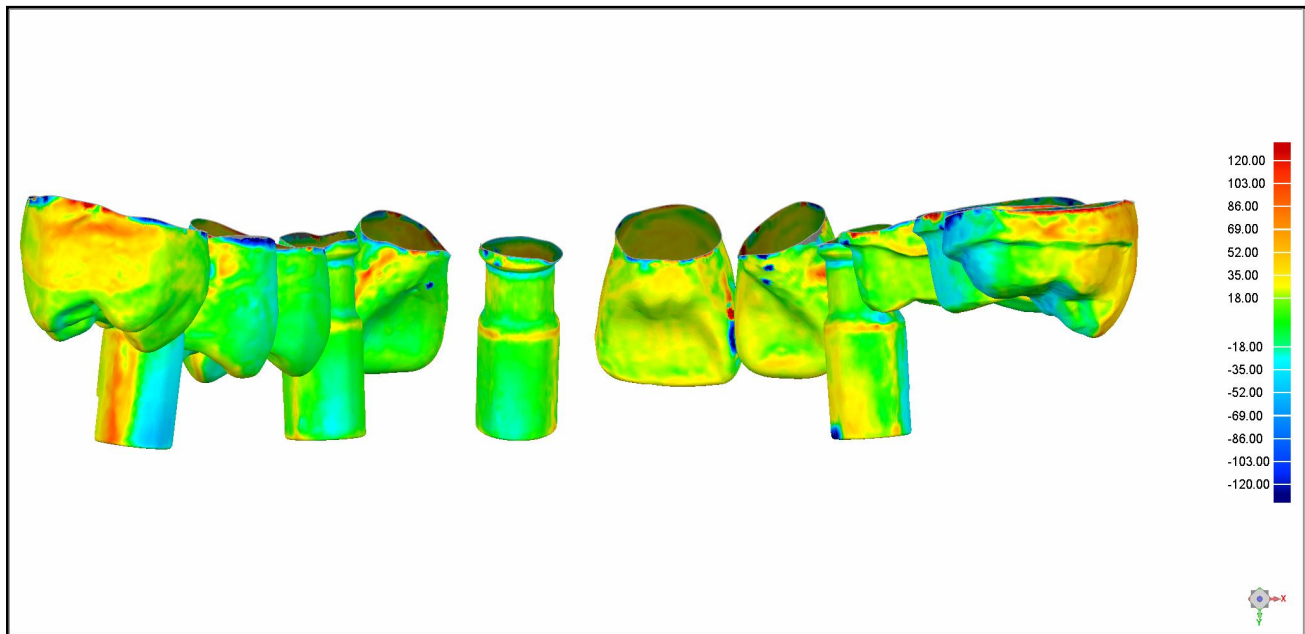

Supplement: S3 (10.1371/journal.pone.0202916.s003) [file journal.pone.0202916.s003]
