# Supplementary material for: Accuracy of four digital scanners according to scanning strategy in complete-arch impressions
Source: PLOS journal article supplement (doi:10.1371/journal.pone.0202916), 2018-09-13

### 3D Comparación Resultados

|                       |        |
|-----------------------|--------|
| Modelo referencia     | MRC    |
| Modelo test           | 3S7C   |
| Nº de puntos de datos | 102263 |
| # Aislados            | 97     |

|                 |               |
|-----------------|---------------|
| Tipo tolerancia | 3D desviación |
| Unidades        | u             |
| Máx. crítico    | 120.00        |
| Máx. nominal    | 15.00         |
| Mín. nominal    | -15.00        |
| Mín. crítico    | -120.00       |

|                          |                |
|--------------------------|----------------|
| Desviación               |                |
| Desviación superior máx. | 3073.71        |
| Desviación inferior máx. | -3123.92       |
| Desviación media         | 61.68 / -50.38 |
| Desviación estándar      | 200.67         |

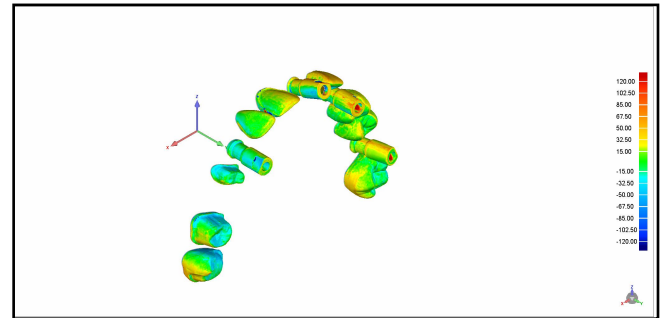

#### Distribución desviación

| >=Min   | <Max    | # Puntos | %     |
|---------|---------|----------|-------|
| -120.00 | -102.50 | 274      | 0.27  |
| -102.50 | -85.00  | 412      | 0.40  |
| -85.00  | -67.50  | 560      | 0.55  |
| -67.50  | -50.00  | 1405     | 1.37  |
| -50.00  | -32.50  | 4903     | 4.79  |
| -32.50  | -15.00  | 12984    | 12.70 |
| -15.00  | 15.00   | 41703    | 40.78 |
| 15.00   | 32.50   | 17737    | 17.34 |
| 32.50   | 50.00   | 9652     | 9.44  |
| 50.00   | 67.50   | 4189     | 4.10  |
| 67.50   | 85.00   | 1654     | 1.62  |
| 85.00   | 102.50  | 694      | 0.68  |
| 102.50  | 120.00  | 408      | 0.40  |

|                            |      |      |
|----------------------------|------|------|
| Fuera del crítico superior | 3759 | 3.68 |
| Fuera del crítico inferior | 1929 | 1.89 |

Distribución desviación

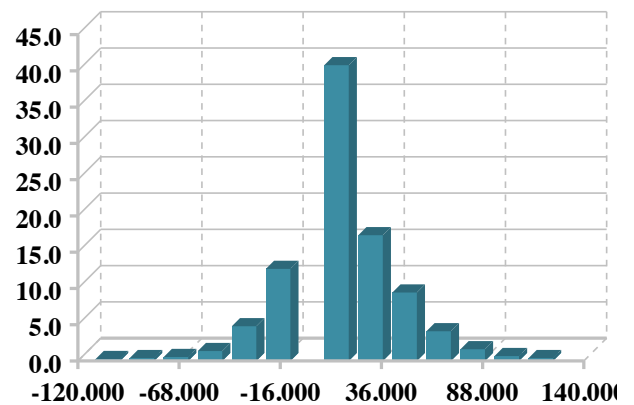

#### Desviaciones estándar

| Distribución (+/-)   | # Puntos | %     |
|----------------------|----------|-------|
| -6 * Desv. estándar. | 548      | 0.54  |
| -5 * Desv. estándar. | 99       | 0.10  |
| -4 * Desv. estándar. | 119      | 0.12  |
| -3 * Desv. estándar. | 161      | 0.16  |
| -2 * Desv. estándar. | 392      | 0.38  |
| -1 * Desv. estándar. | 63518    | 62.11 |
| 1 * Desv. estándar.  | 34885    | 34.11 |
| 2 * Desv. estándar.  | 715      | 0.70  |
| 3 * Desv. estándar.  | 358      | 0.35  |
| 4 * Desv. estándar.  | 334      | 0.33  |
| 5 * Desv. estándar.  | 309      | 0.30  |
| 6 * Desv. estándar.  | 825      | 0.81  |

Desviaciones estándar

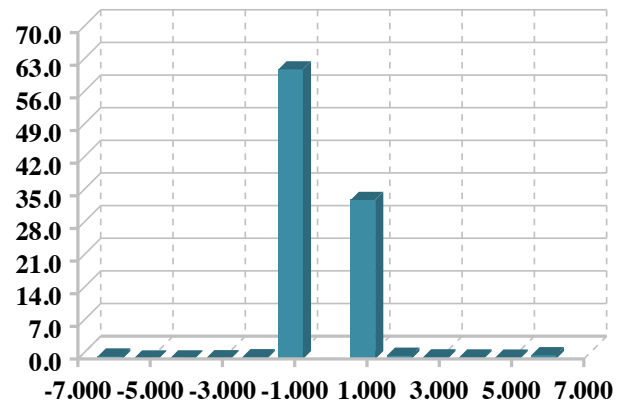

Predefinido: Isométrico

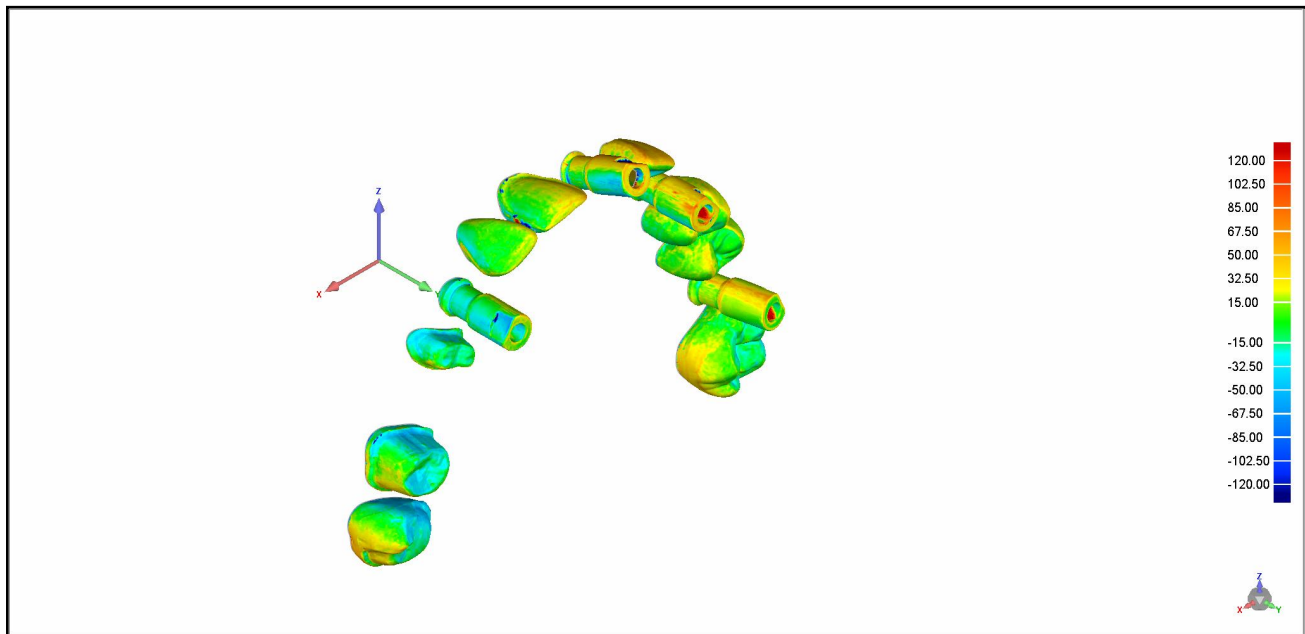

Predefinido: Frente

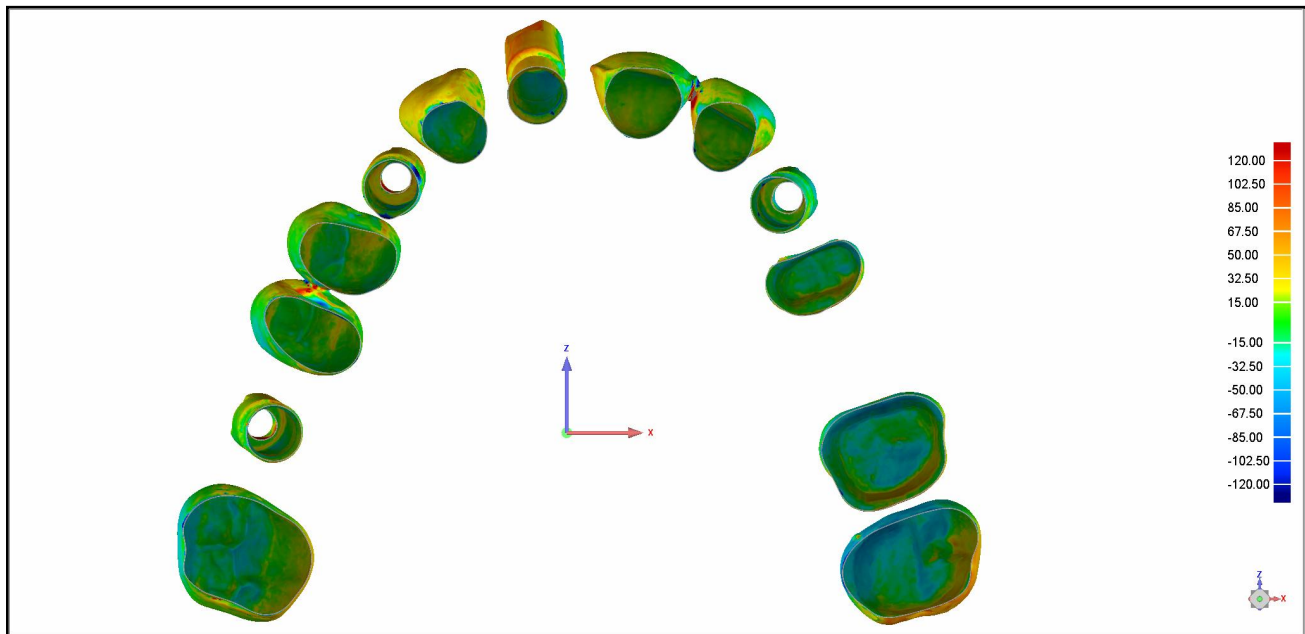

Predefinido: Atrás

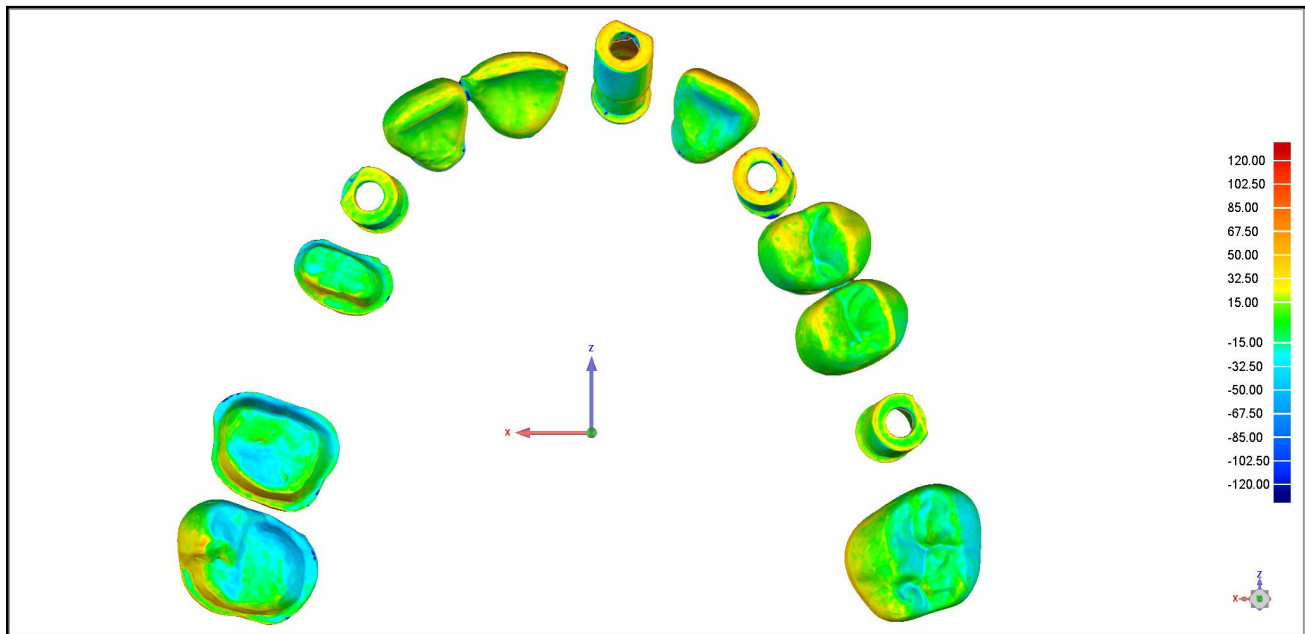

Predefinido: Izquierda

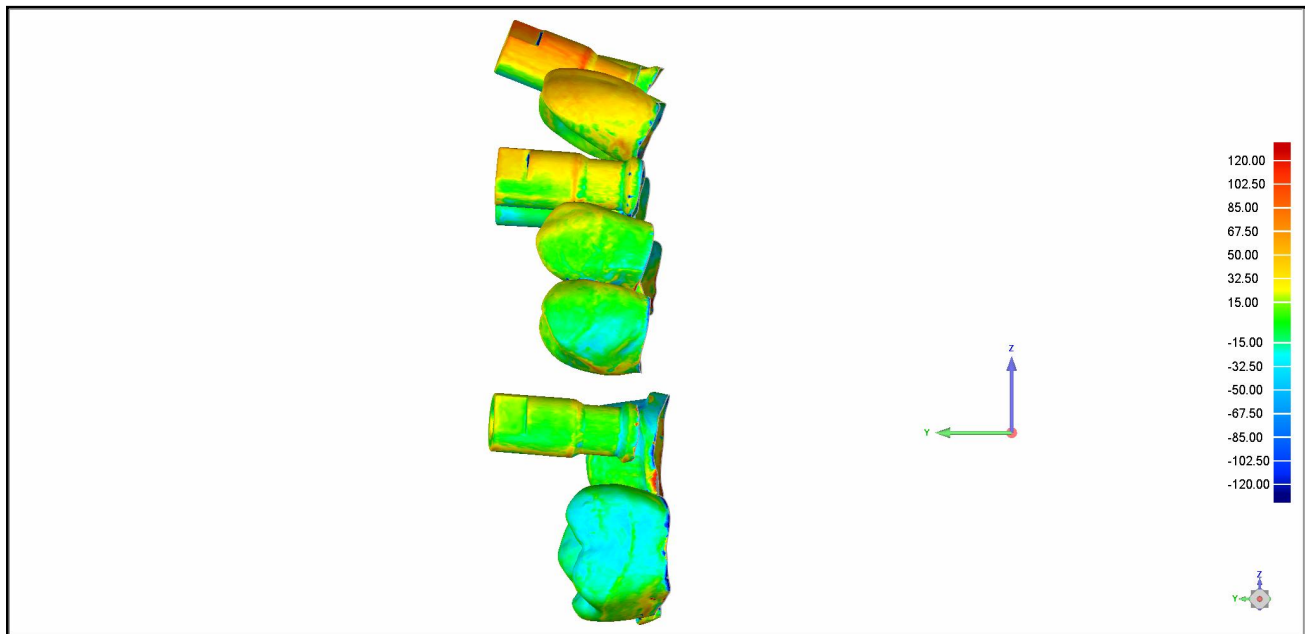

Predefinido: Derecha

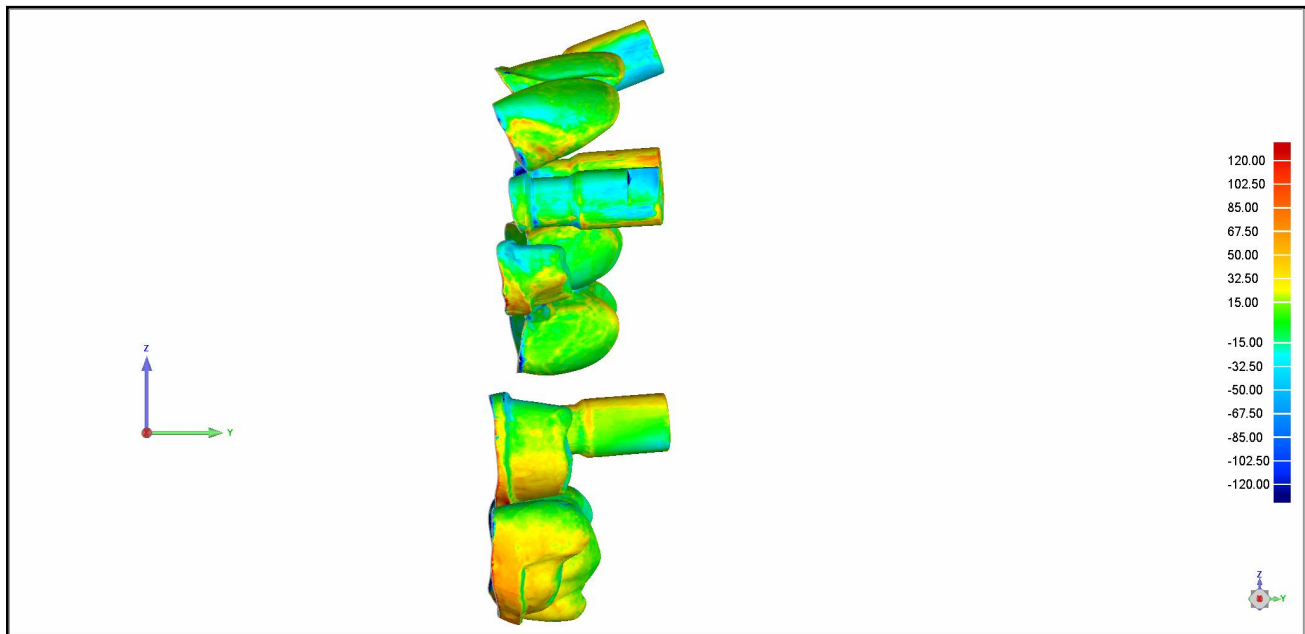

Predefinido: Superior

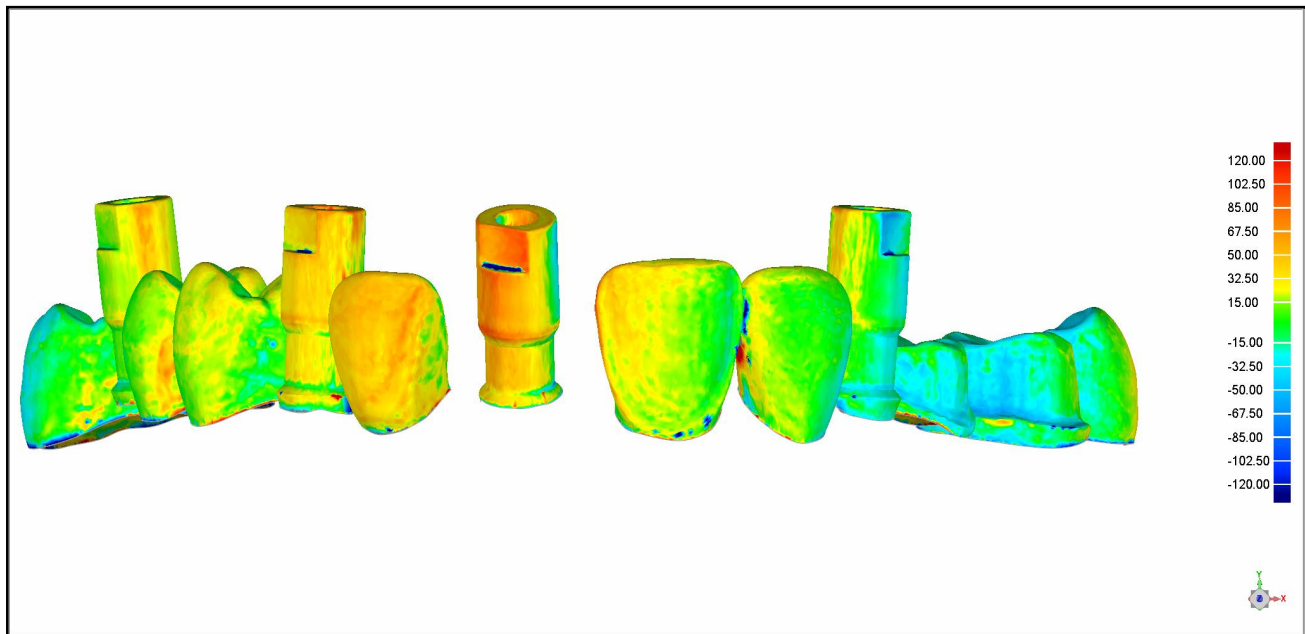

Predefinido: Inferior

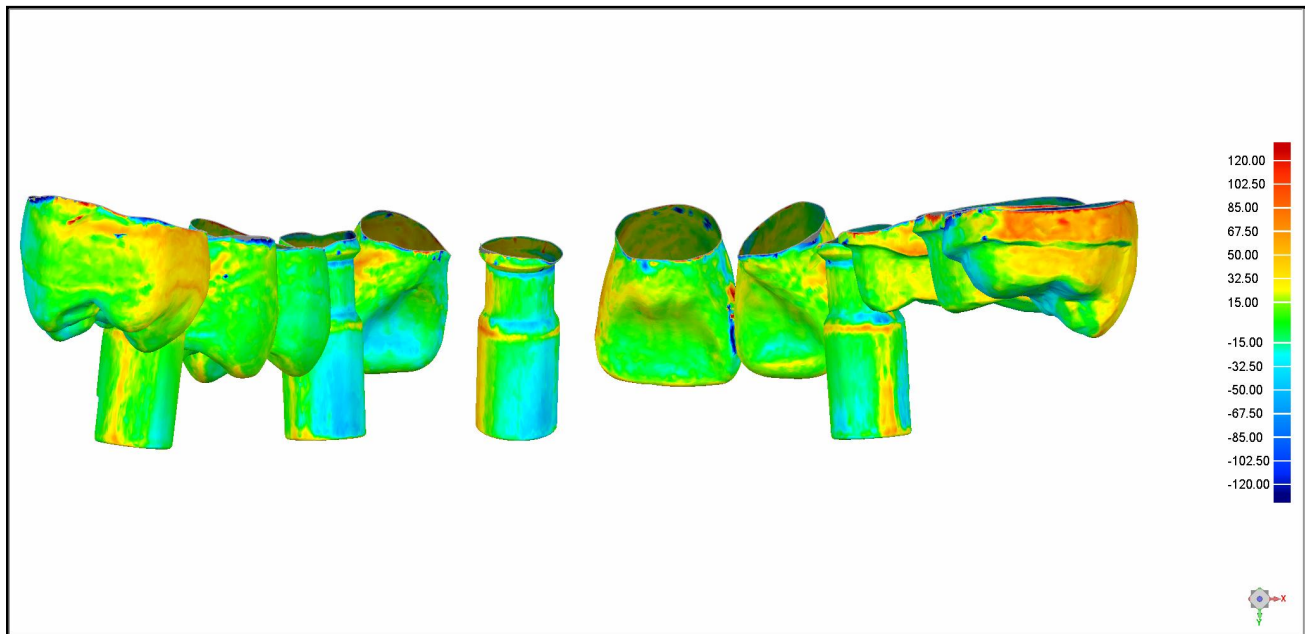

Supplement: S3 (10.1371/journal.pone.0202916.s003) [file journal.pone.0202916.s003]
