# Supplementary material for: Accuracy of four digital scanners according to scanning strategy in complete-arch impressions
Source: PLOS journal article supplement (doi:10.1371/journal.pone.0202916), 2018-09-13

### 3D Comparación Resultados

|                       |        |
|-----------------------|--------|
| Modelo referencia     | MRC    |
| Modelo test           | 3S6C   |
| Nº de puntos de datos | 105511 |
| # Aislados            | 61     |

|                 |               |
|-----------------|---------------|
| Tipo tolerancia | 3D desviación |
| Unidades        | u             |
| Máx. crítico    | 120.00        |
| Máx. nominal    | 17.00         |
| Mín. nominal    | -17.00        |
| Mín. crítico    | -120.00       |

|                          |                |
|--------------------------|----------------|
| Desviación               |                |
| Desviación superior máx. | 3095.71        |
| Desviación inferior máx. | -2999.60       |
| Desviación media         | 58.71 / -47.10 |
| Desviación estándar      | 190.12         |

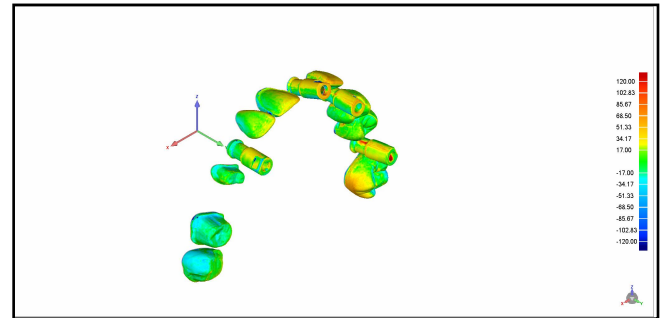

#### Distribución desviación

| >=Min   | <Max    | # Puntos | %     |
|---------|---------|----------|-------|
| -120.00 | -102.83 | 275      | 0.26  |
| -102.83 | -85.67  | 354      | 0.34  |
| -85.67  | -68.50  | 581      | 0.55  |
| -68.50  | -51.33  | 1137     | 1.08  |
| -51.33  | -34.17  | 4052     | 3.84  |
| -34.17  | -17.00  | 10708    | 10.15 |
| -17.00  | 17.00   | 51099    | 48.43 |
| 17.00   | 34.17   | 18039    | 17.10 |
| 34.17   | 51.33   | 8049     | 7.63  |
| 51.33   | 68.50   | 3436     | 3.26  |
| 68.50   | 85.67   | 1119     | 1.06  |
| 85.67   | 102.83  | 527      | 0.50  |
| 102.83  | 120.00  | 392      | 0.37  |

|                            |      |      |
|----------------------------|------|------|
| Fuera del crítico superior | 3797 | 3.60 |
| Fuera del crítico inferior | 1946 | 1.84 |

Distribución desviación

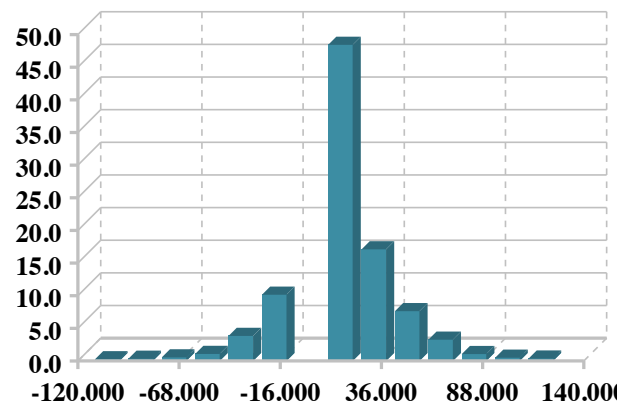

#### Desviaciones estándar

| Distribución (+/-)   | # Puntos | %     |
|----------------------|----------|-------|
| -6 * Desv. estándar. | 491      | 0.47  |
| -5 * Desv. estándar. | 95       | 0.09  |
| -4 * Desv. estándar. | 120      | 0.11  |
| -3 * Desv. estándar. | 173      | 0.16  |
| -2 * Desv. estándar. | 532      | 0.50  |
| -1 * Desv. estándar. | 69782    | 66.14 |
| 1 * Desv. estándar.  | 31489    | 29.84 |
| 2 * Desv. estándar.  | 731      | 0.69  |
| 3 * Desv. estándar.  | 422      | 0.40  |
| 4 * Desv. estándar.  | 429      | 0.41  |
| 5 * Desv. estándar.  | 342      | 0.32  |
| 6 * Desv. estándar.  | 905      | 0.86  |

Desviaciones estándar

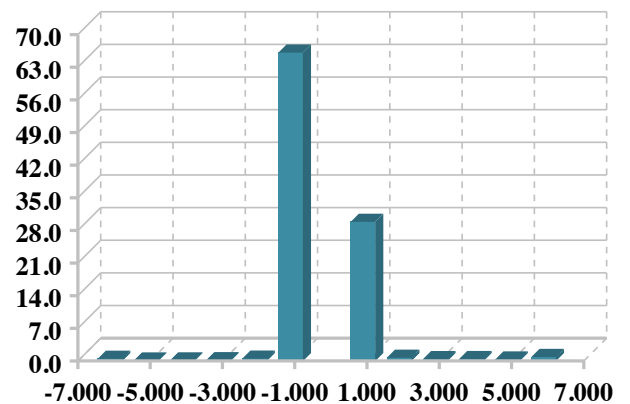

Predefinido: Isométrico

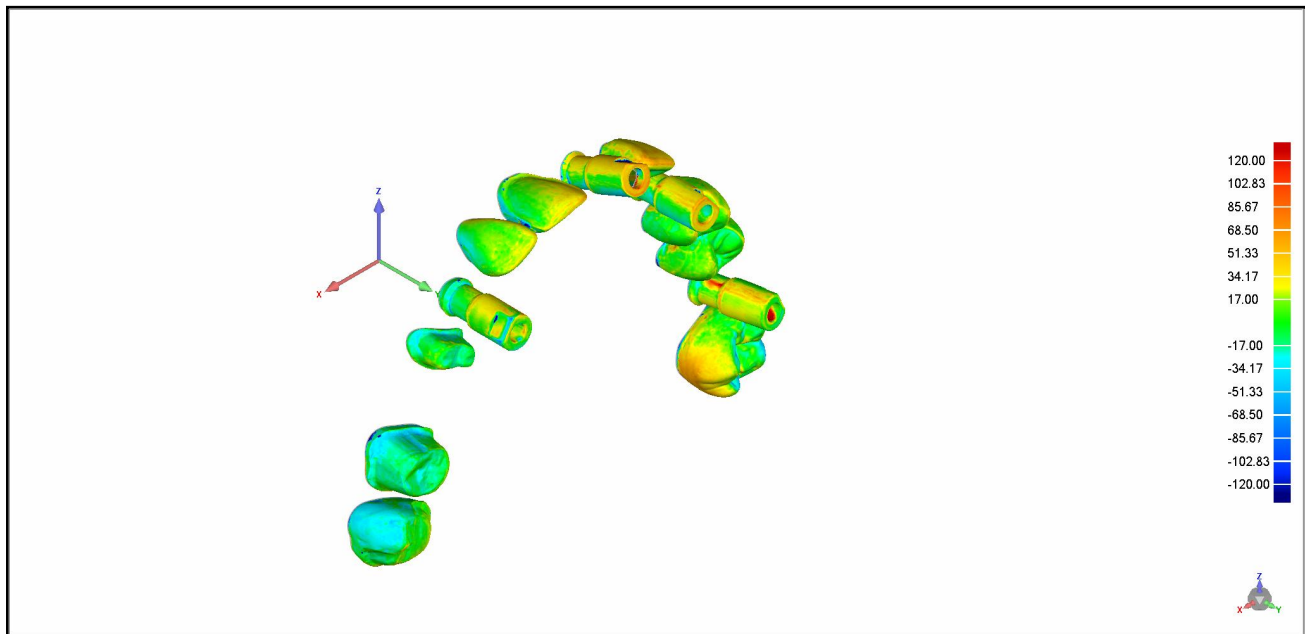

Predefinido: Frente

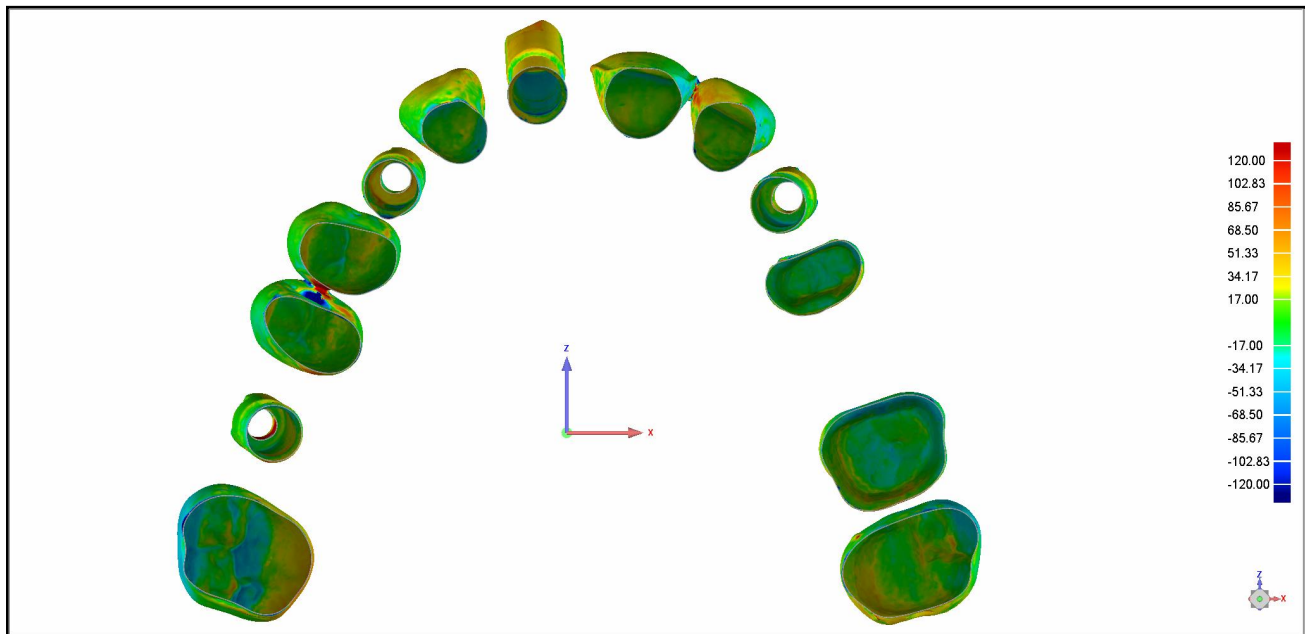

Predefinido: Atrás

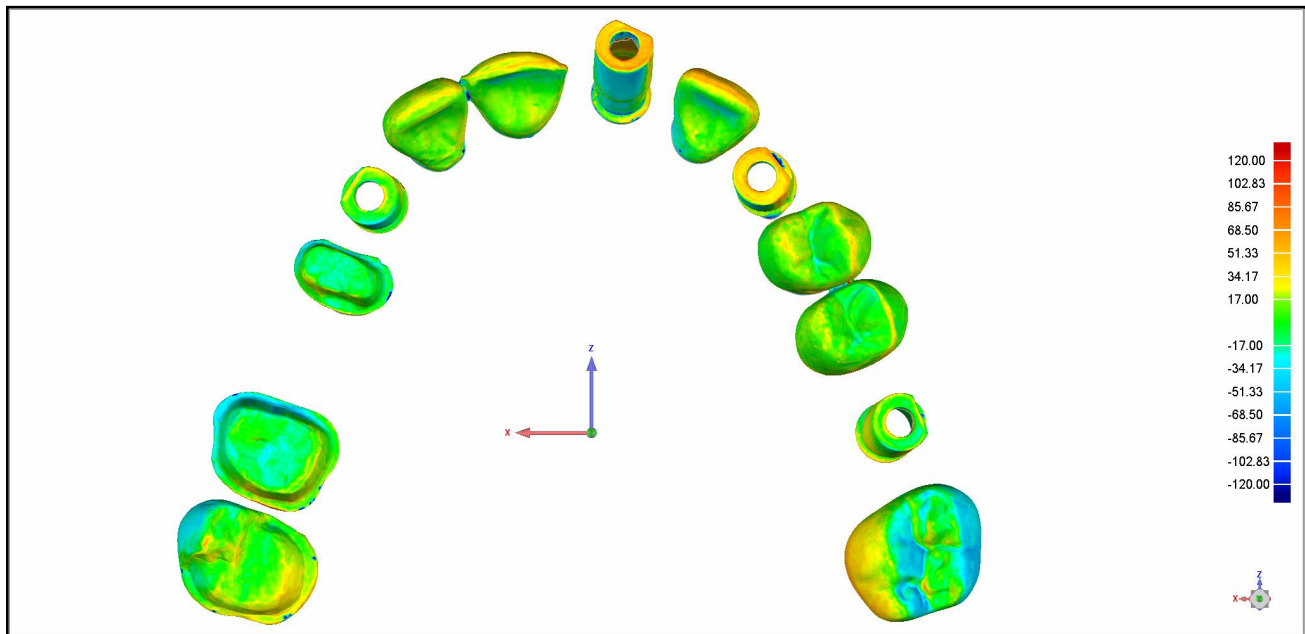

Predefinido: Izquierda

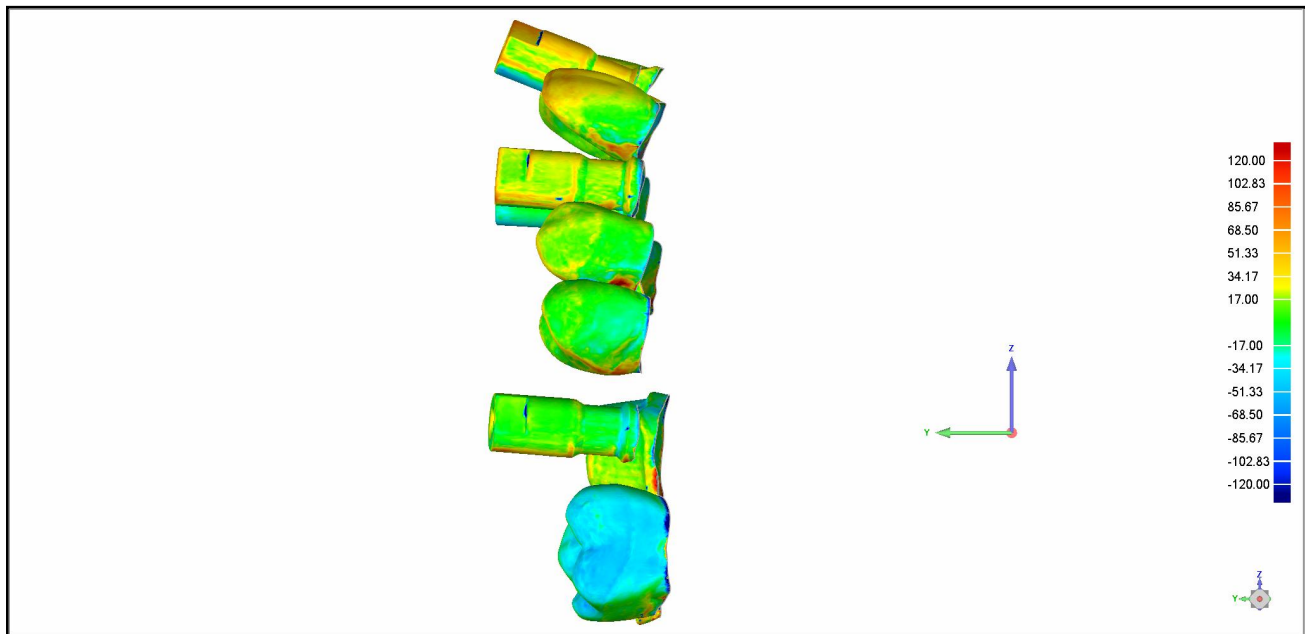

Predefinido: Derecha

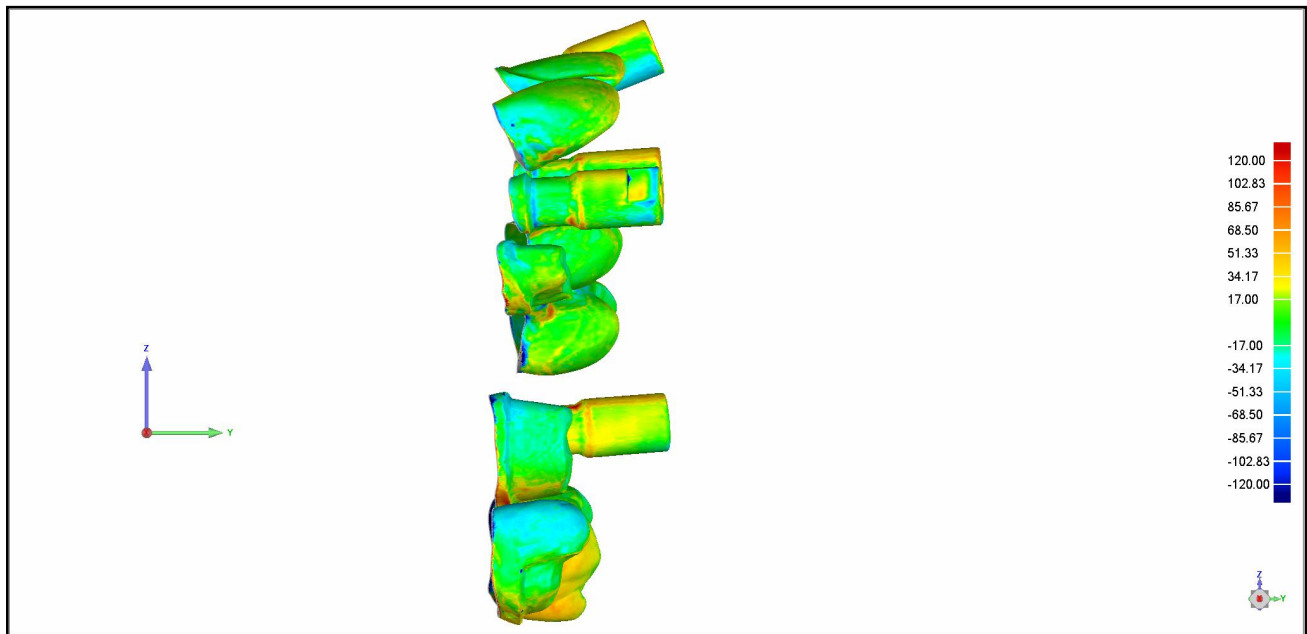

Predefinido: Superior

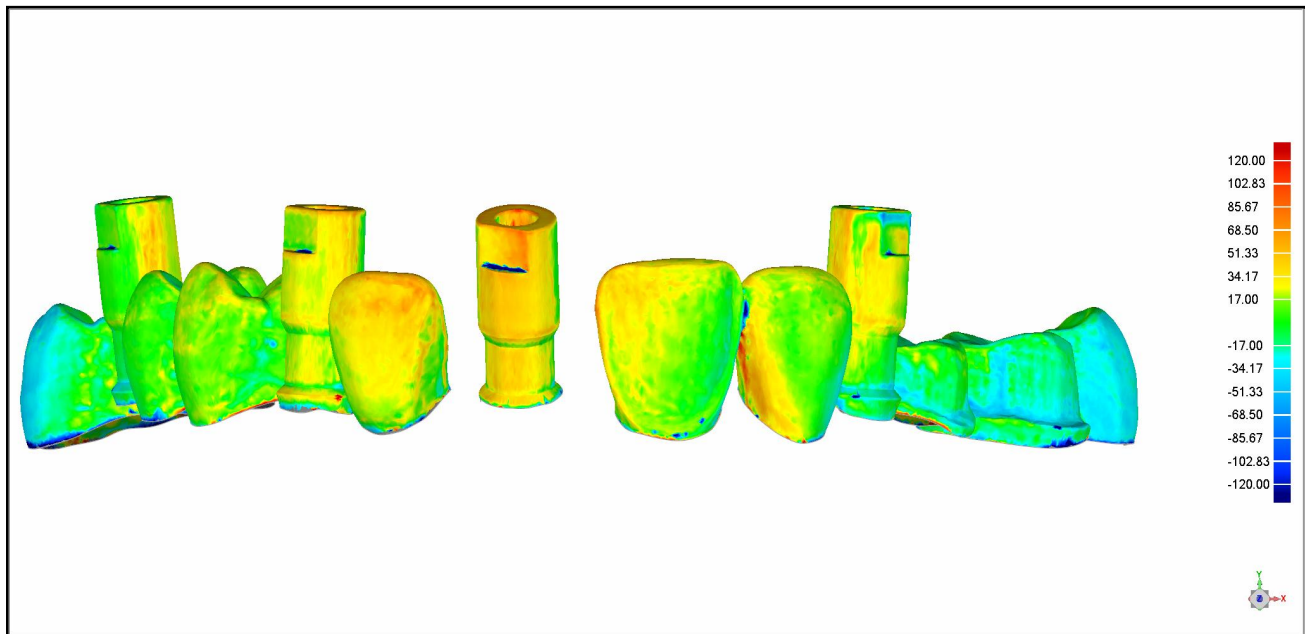

Predefinido: Inferior

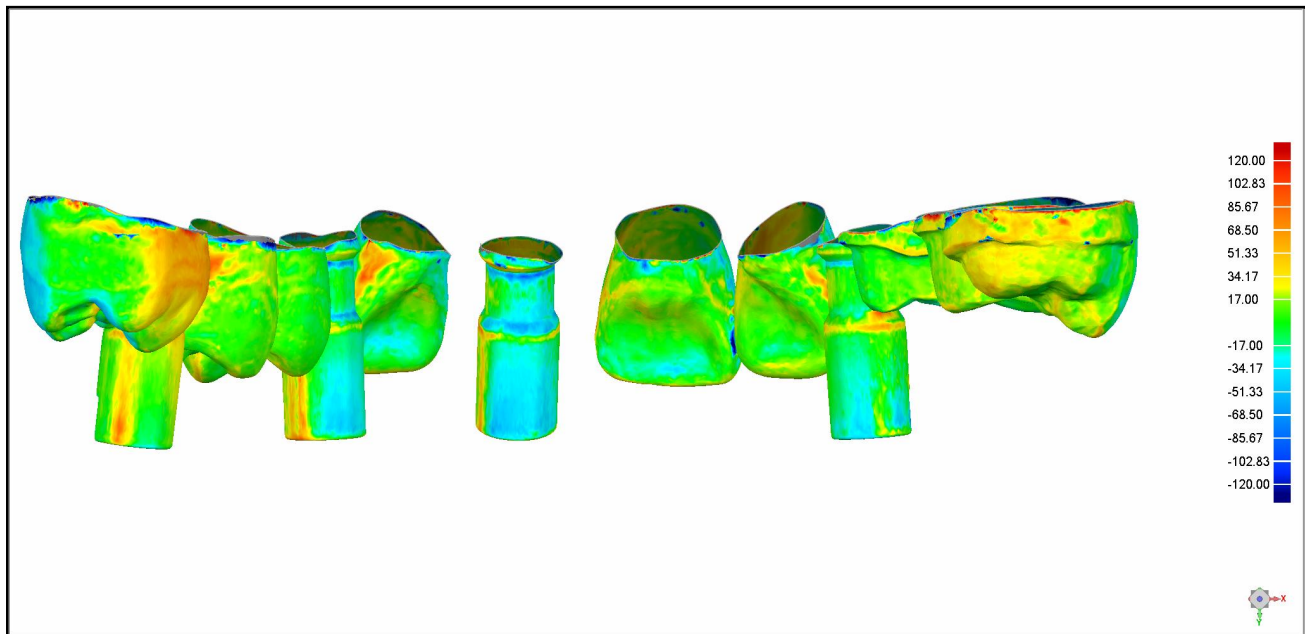

Supplement: S3 (10.1371/journal.pone.0202916.s003) [file journal.pone.0202916.s003]
