# Supplementary material for: Accuracy of four digital scanners according to scanning strategy in complete-arch impressions
Source: PLOS journal article supplement (doi:10.1371/journal.pone.0202916), 2018-09-13

### 3D Comparación Resultados

|                       |        |
|-----------------------|--------|
| Modelo referencia     | MRC    |
| Modelo test           | 3S10C  |
| Nº de puntos de datos | 100823 |
| # Aislados            | 116    |

|                 |               |
|-----------------|---------------|
| Tipo tolerancia | 3D desviación |
| Unidades        | u             |
| Máx. crítico    | 120.00        |
| Máx. nominal    | 16.00         |
| Mín. nominal    | -16.00        |
| Mín. crítico    | -120.00       |

|                          |               |
|--------------------------|---------------|
| Desviación               |               |
| Desviación superior máx. | 3039.11       |
| Desviación inferior máx. | -3110.99      |
| Desviación media         | 60.76 /-45.97 |
| Desviación estándar      | 191.82        |

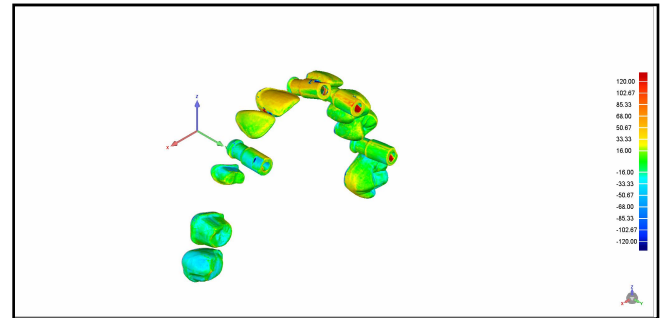

#### Distribución desviación

| >=Min   | <Max    | # Puntos | %     |
|---------|---------|----------|-------|
| -120.00 | -102.67 | 243      | 0.24  |
| -102.67 | -85.33  | 384      | 0.38  |
| -85.33  | -68.00  | 581      | 0.58  |
| -68.00  | -50.67  | 1308     | 1.30  |
| -50.67  | -33.33  | 3579     | 3.55  |
| -33.33  | -16.00  | 11199    | 11.11 |
| -16.00  | 16.00   | 49626    | 49.22 |
| 16.00   | 33.33   | 15962    | 15.83 |
| 33.33   | 50.67   | 7263     | 7.20  |
| 50.67   | 68.00   | 2993     | 2.97  |
| 68.00   | 85.33   | 1131     | 1.12  |
| 85.33   | 102.67  | 552      | 0.55  |
| 102.67  | 120.00  | 391      | 0.39  |

|                            |      |      |
|----------------------------|------|------|
| Fuera del crítico superior | 3750 | 3.72 |
| Fuera del crítico inferior | 1861 | 1.85 |

Distribución desviación

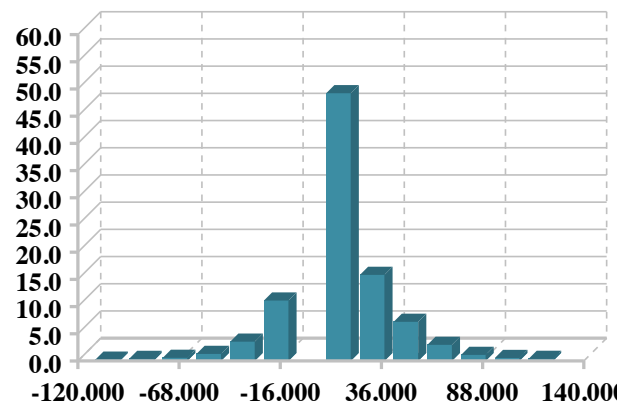

#### Desviaciones estándar

| Distribución (+/-)  | # Puntos | %     |
|---------------------|----------|-------|
| -6 * Desv. estándar | 543      | 0.54  |
| -5 * Desv. estándar | 109      | 0.11  |
| -4 * Desv. estándar | 121      | 0.12  |
| -3 * Desv. estándar | 151      | 0.15  |
| -2 * Desv. estándar | 445      | 0.44  |
| -1 * Desv. estándar | 67983    | 67.43 |
| 1 * Desv. estándar  | 28729    | 28.49 |
| 2 * Desv. estándar  | 678      | 0.67  |
| 3 * Desv. estándar  | 396      | 0.39  |
| 4 * Desv. estándar  | 401      | 0.40  |
| 5 * Desv. estándar  | 383      | 0.38  |
| 6 * Desv. estándar  | 884      | 0.88  |

Desviaciones estándar

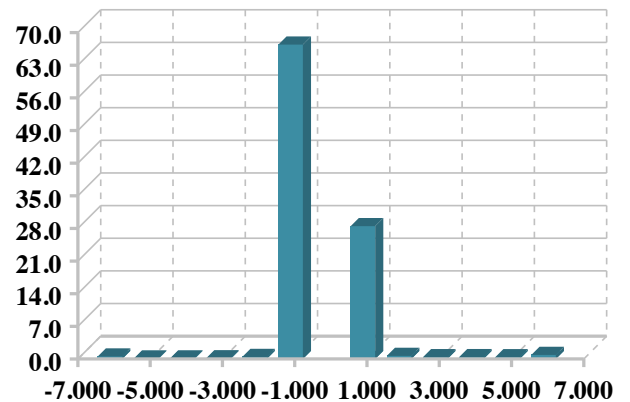

Predefinido: Isométrico

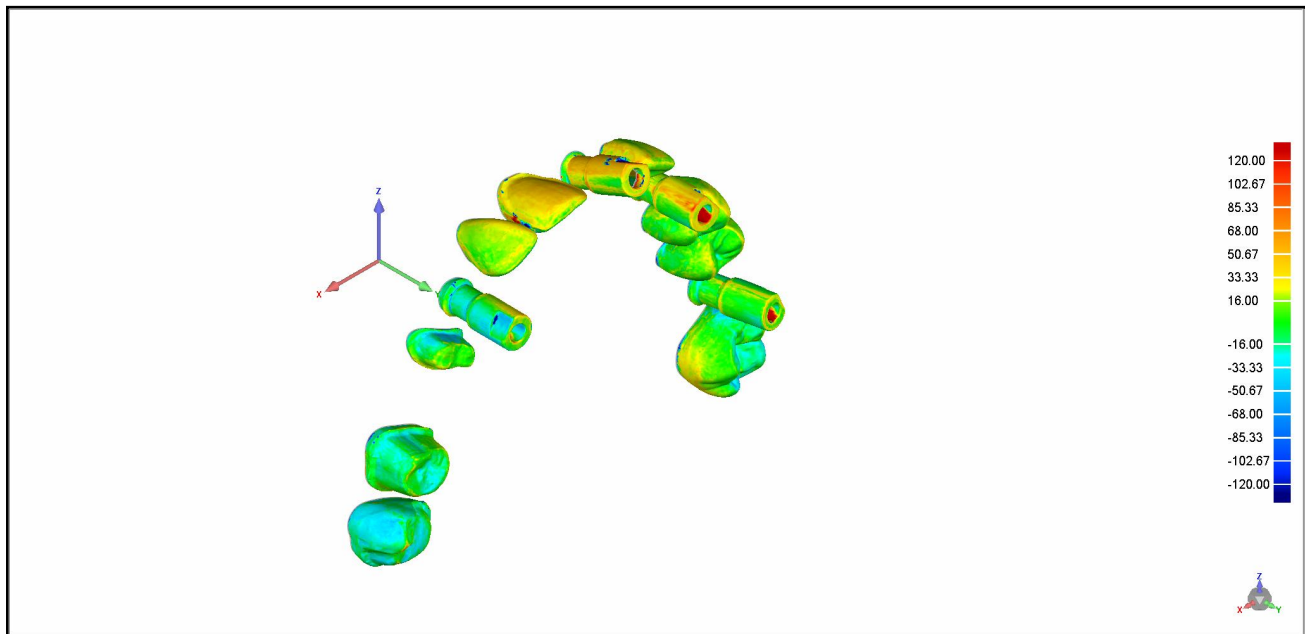

Predefinido: Frente

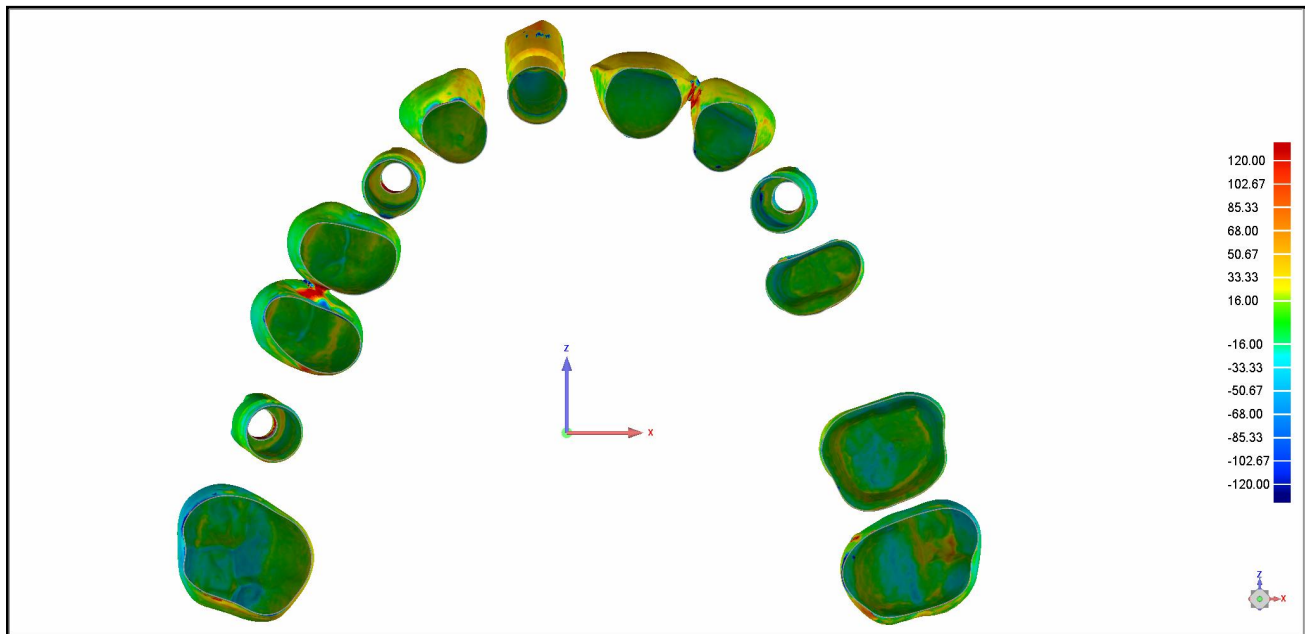

Predefinido: Atrás

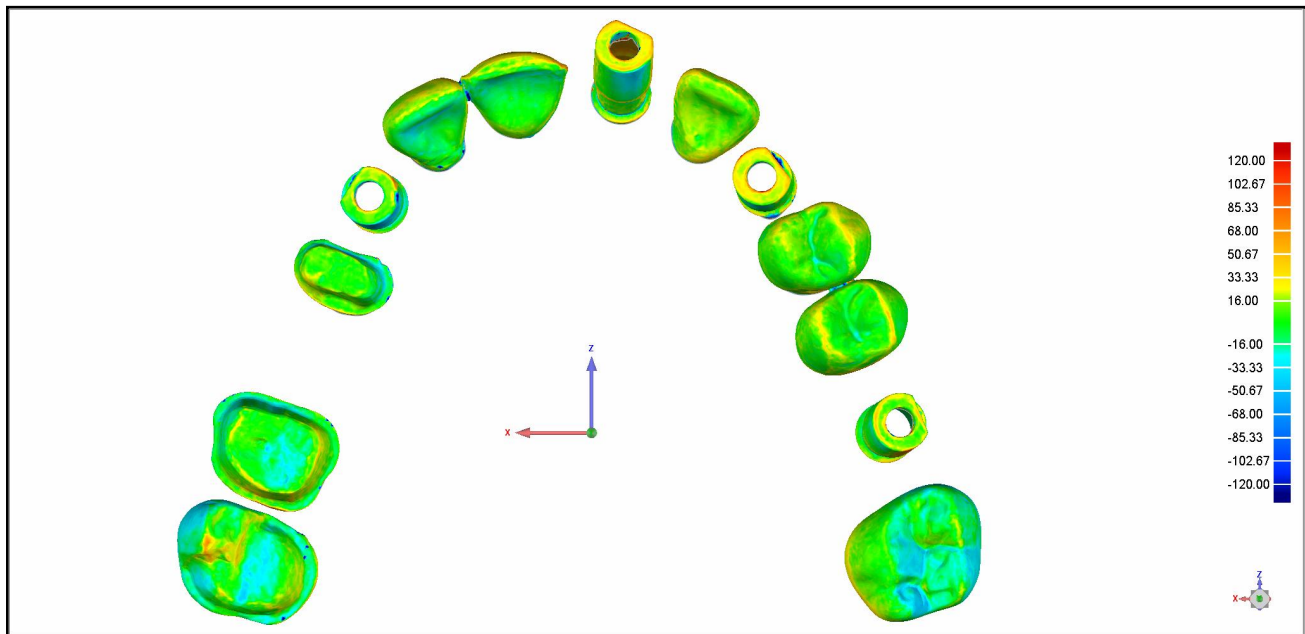

Predefinido: Izquierda

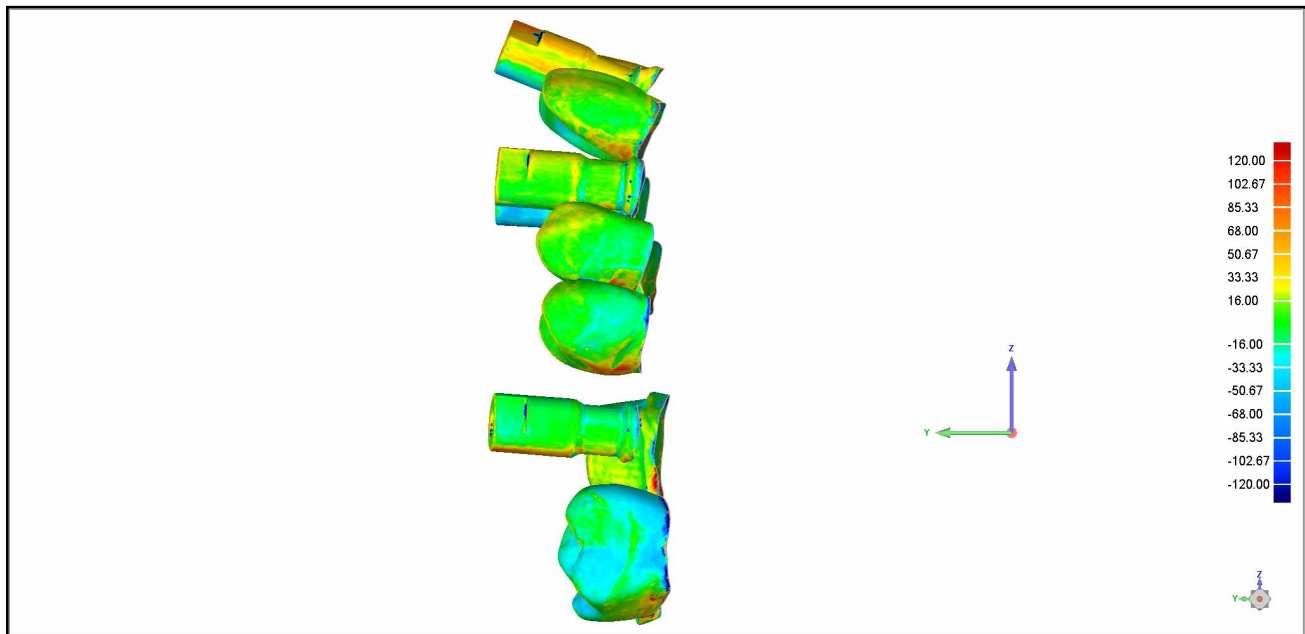

Predefinido: Derecha

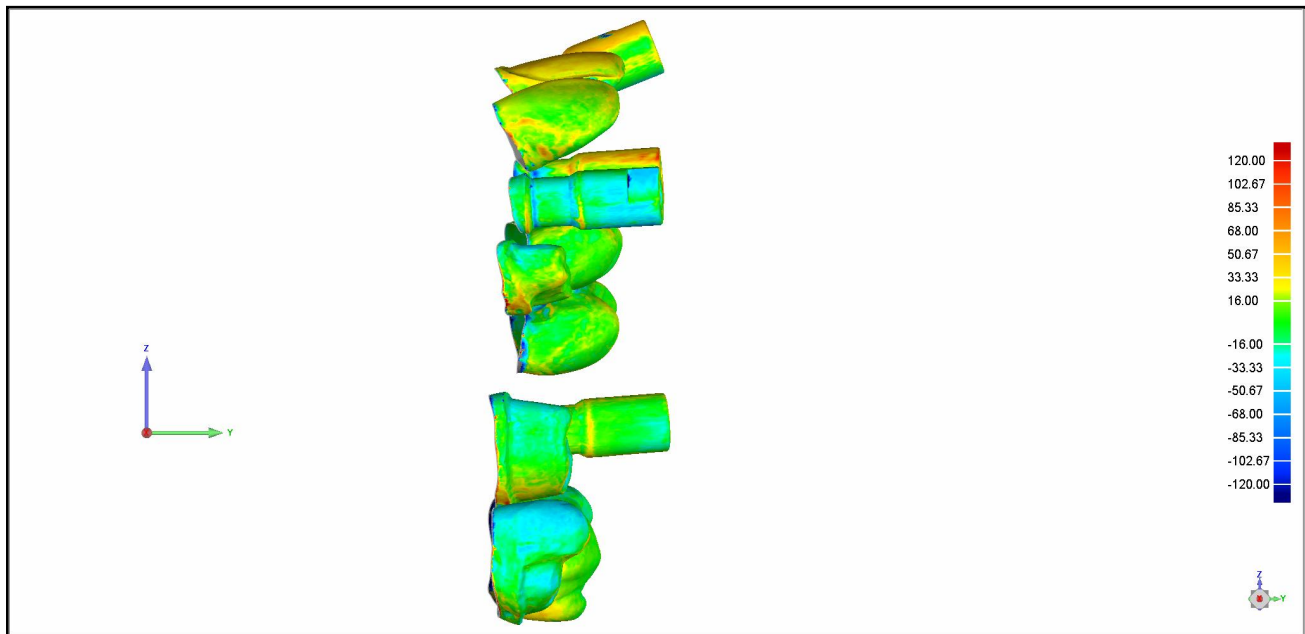

Predefinido: Superior

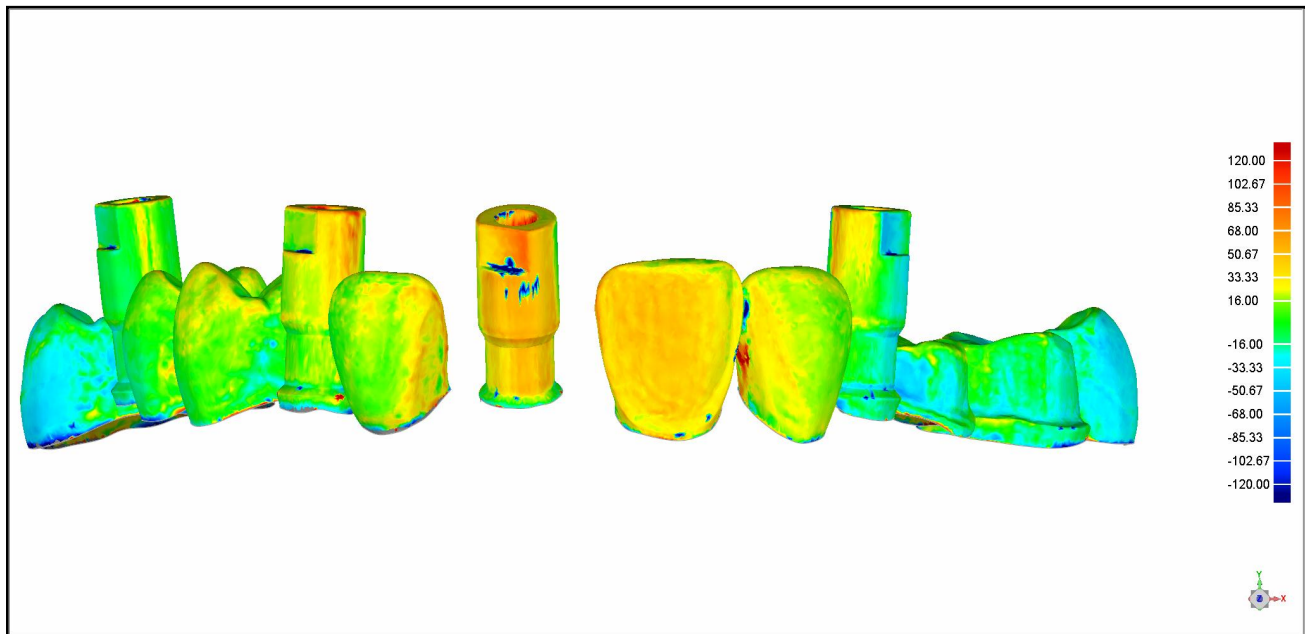

Predefinido: Inferior

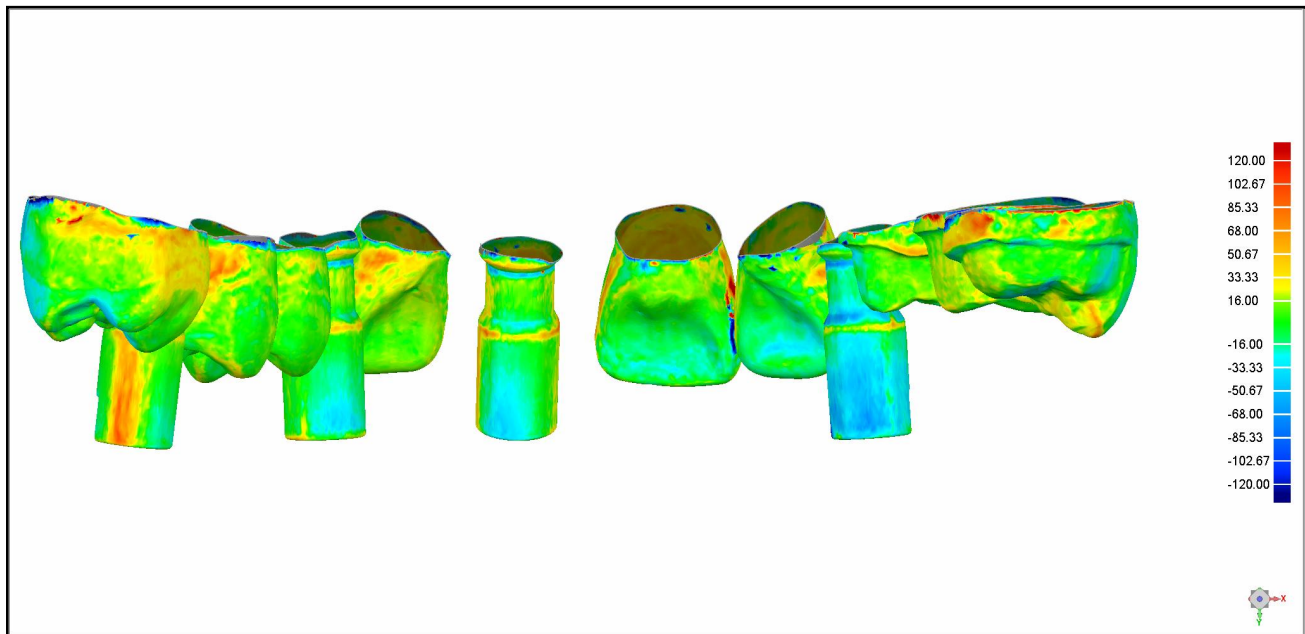

Supplement: S3 (10.1371/journal.pone.0202916.s003) [file journal.pone.0202916.s003]
