# Supplementary material for: Accuracy of four digital scanners according to scanning strategy in complete-arch impressions
Source: PLOS journal article supplement (doi:10.1371/journal.pone.0202916), 2018-09-13

### 3D Comparación Resultados

|                       |       |
|-----------------------|-------|
| Modelo referencia     | MRC   |
| Modelo test           | 3S3C  |
| Nº de puntos de datos | 98150 |
| # Aislados            | 70    |

|                 |               |
|-----------------|---------------|
| Tipo tolerancia | 3D desviación |
| Unidades        | u             |
| Máx. crítico    | 120.00        |
| Máx. nominal    | 20.00         |
| Mín. nominal    | -20.00        |
| Mín. crítico    | -120.00       |

|                          |                |
|--------------------------|----------------|
| Desviación               |                |
| Desviación superior máx. | 3067.57        |
| Desviación inferior máx. | -3100.80       |
| Desviación media         | 61.35 / -49.67 |
| Desviación estándar      | 197.05         |

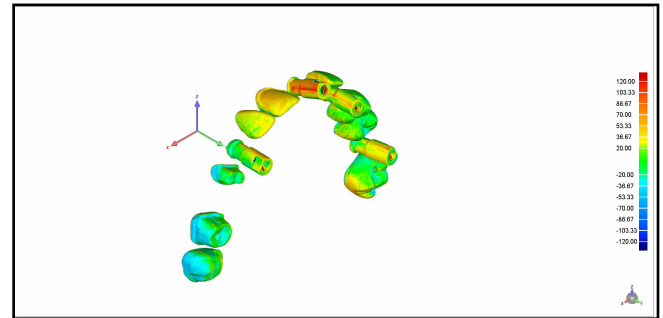

#### Distribución desviación

| >=Min   | <Max    | # Puntos | %     |
|---------|---------|----------|-------|
| -120.00 | -103.33 | 261      | 0.27  |
| -103.33 | -86.67  | 332      | 0.34  |
| -86.67  | -70.00  | 441      | 0.45  |
| -70.00  | -53.33  | 771      | 0.79  |
| -53.33  | -36.67  | 2690     | 2.74  |
| -36.67  | -20.00  | 8152     | 8.31  |
| -20.00  | 20.00   | 50816    | 51.77 |
| 20.00   | 36.67   | 15443    | 15.73 |
| 36.67   | 53.33   | 7998     | 8.15  |
| 53.33   | 70.00   | 3057     | 3.11  |
| 70.00   | 86.67   | 1351     | 1.38  |
| 86.67   | 103.33  | 762      | 0.78  |
| 103.33  | 120.00  | 479      | 0.49  |

|                            |      |      |
|----------------------------|------|------|
| Fuera del crítico superior | 3776 | 3.85 |
| Fuera del crítico inferior | 1821 | 1.86 |

Distribución desviación

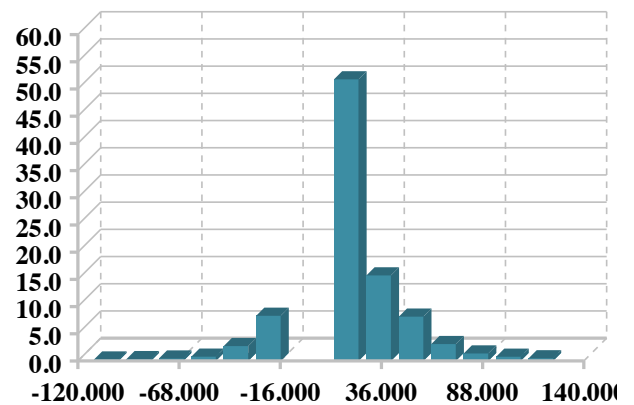

#### Desviaciones estándar

| Distribución (+/-)   | # Puntos | %     |
|----------------------|----------|-------|
| -6 * Desv. estándar. | 471      | 0.48  |
| -5 * Desv. estándar. | 74       | 0.08  |
| -4 * Desv. estándar. | 128      | 0.13  |
| -3 * Desv. estándar. | 138      | 0.14  |
| -2 * Desv. estándar. | 492      | 0.50  |
| -1 * Desv. estándar. | 64367    | 65.58 |
| 1 * Desv. estándar.  | 29889    | 30.45 |
| 2 * Desv. estándar.  | 727      | 0.74  |
| 3 * Desv. estándar.  | 324      | 0.33  |
| 4 * Desv. estándar.  | 307      | 0.31  |
| 5 * Desv. estándar.  | 309      | 0.31  |
| 6 * Desv. estándar.  | 924      | 0.94  |

Desviaciones estándar

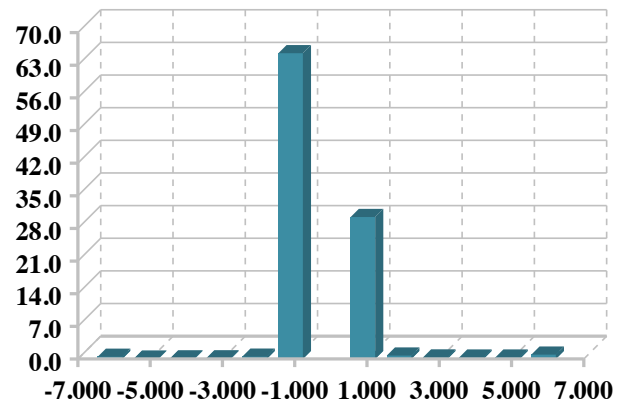

Predefinido: Isométrico

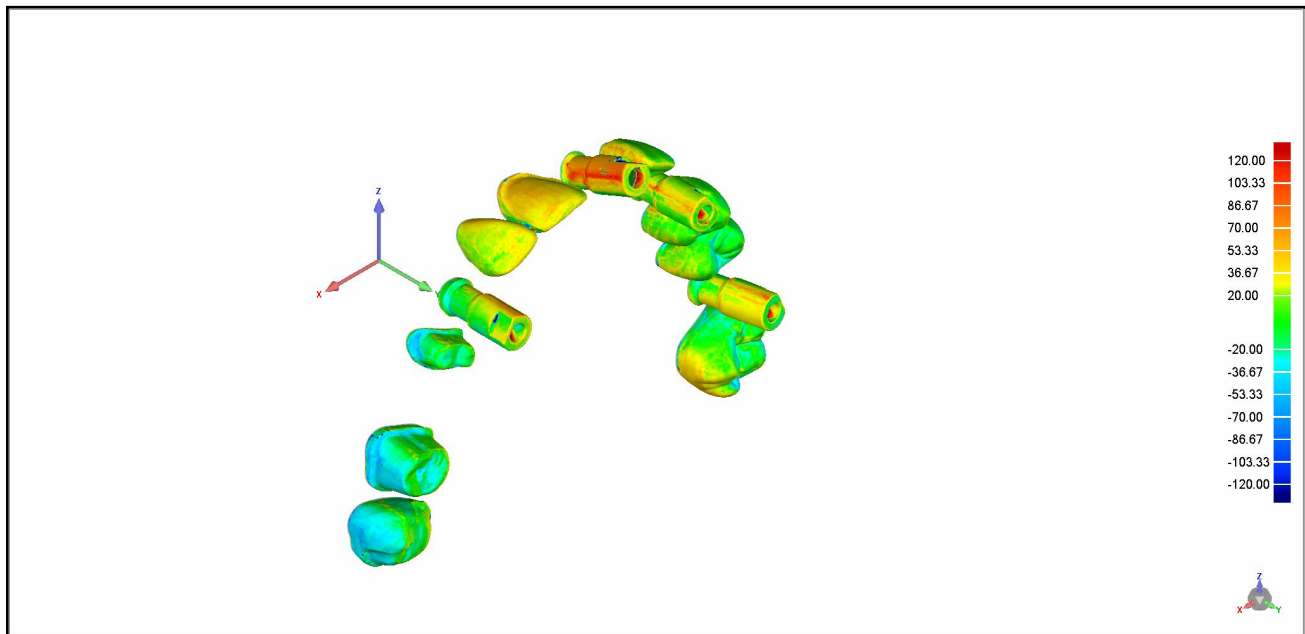

Predefinido: Frente

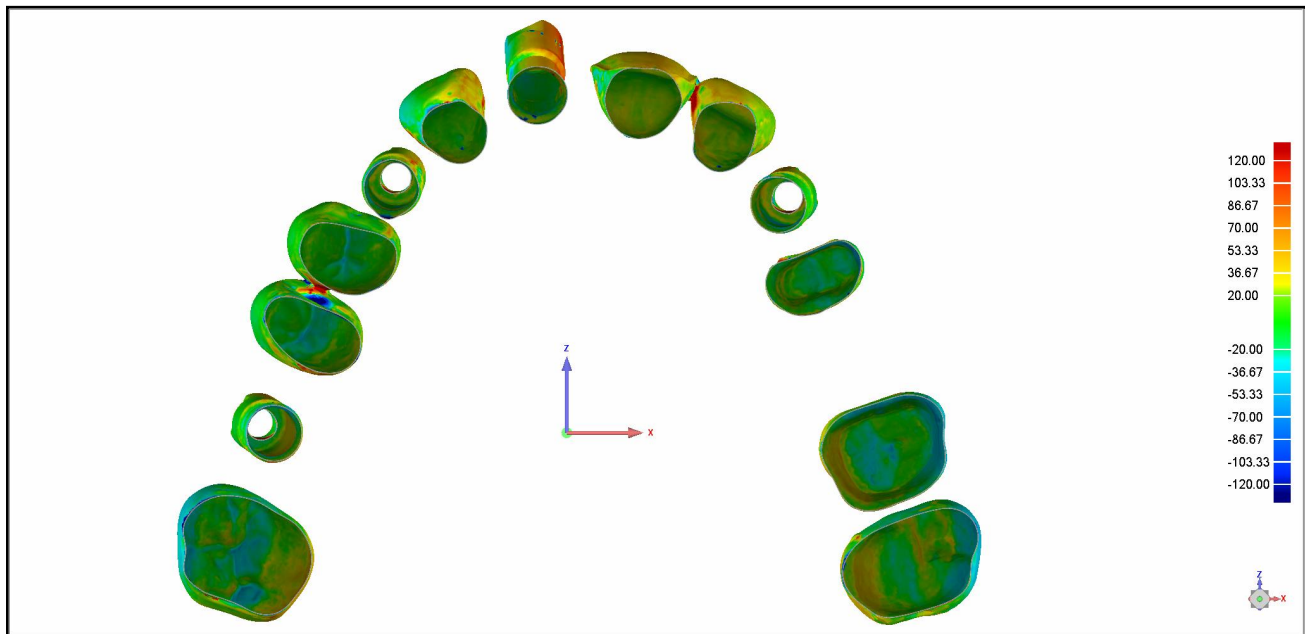

Predefinido: Atrás

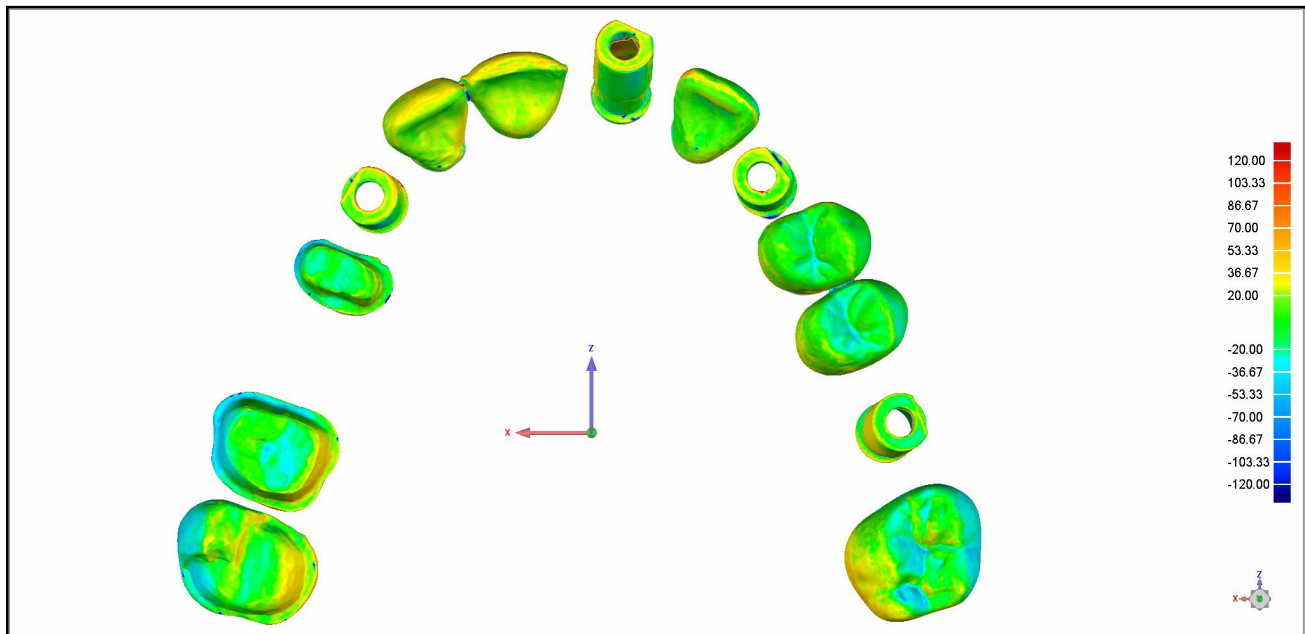

Predefinido: Izquierda

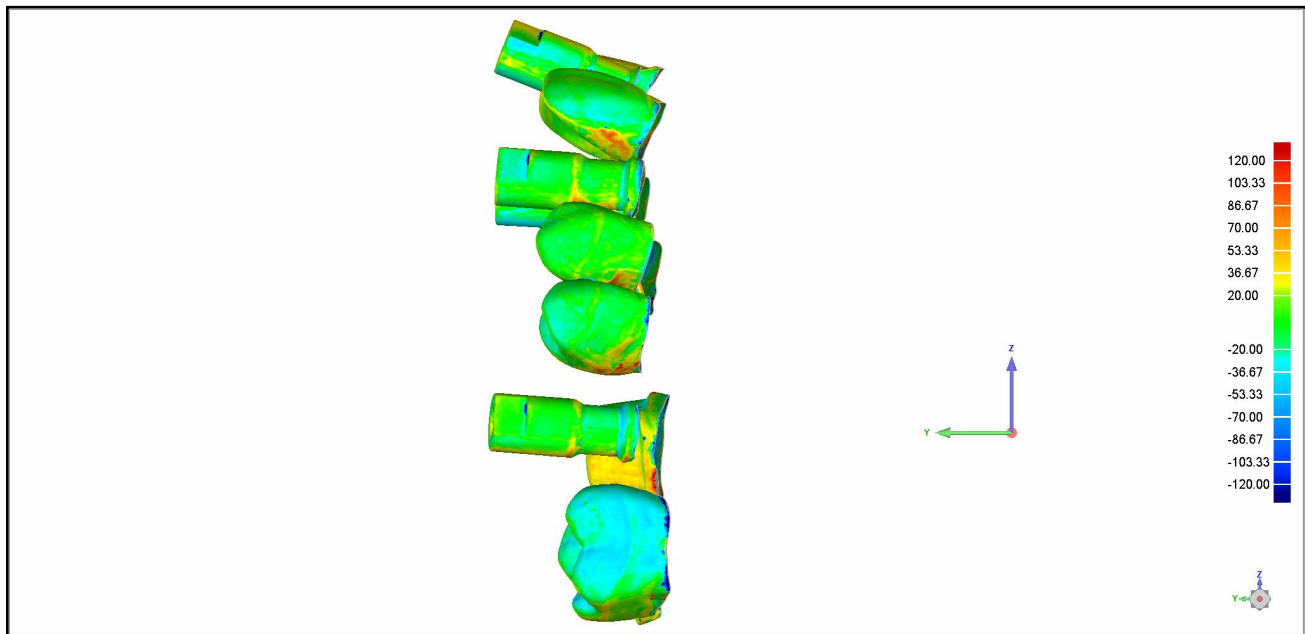

Predefinido: Derecha

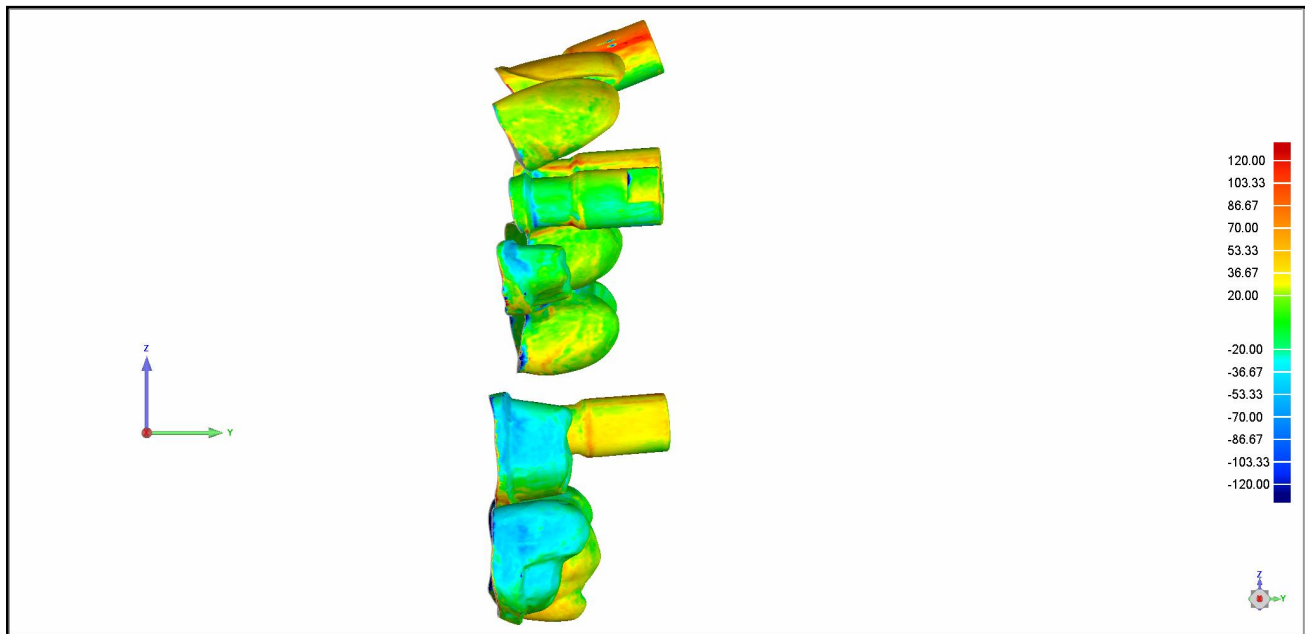

Predefinido: Superior

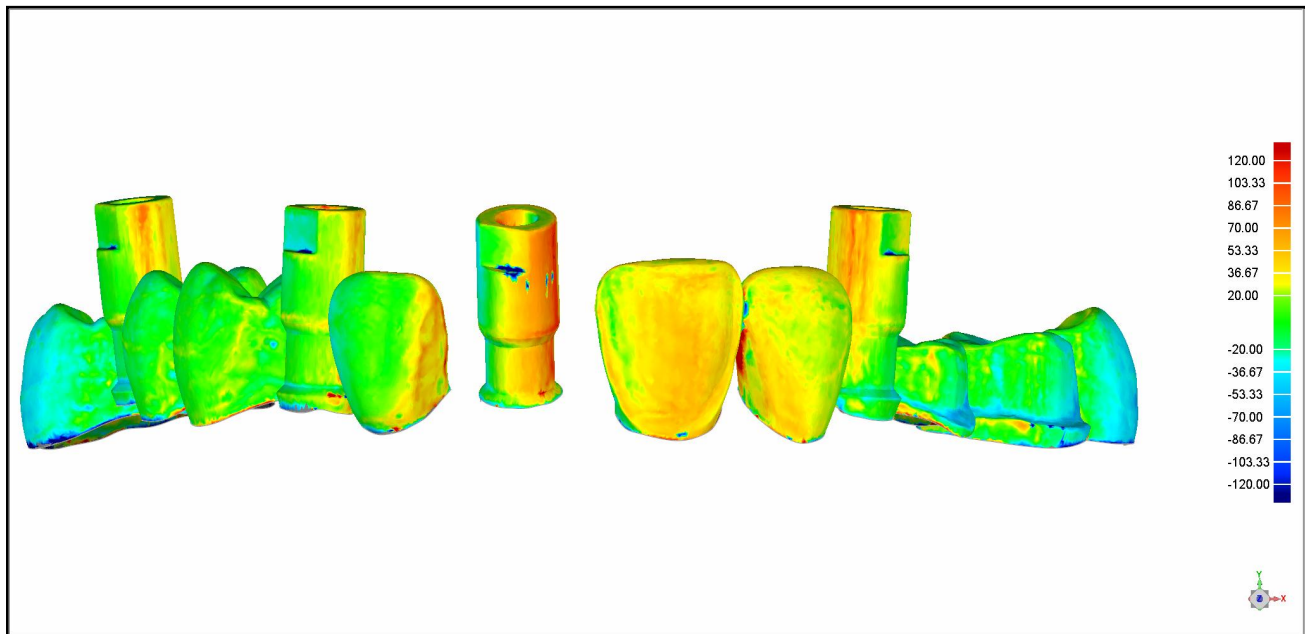

Predefinido: Inferior

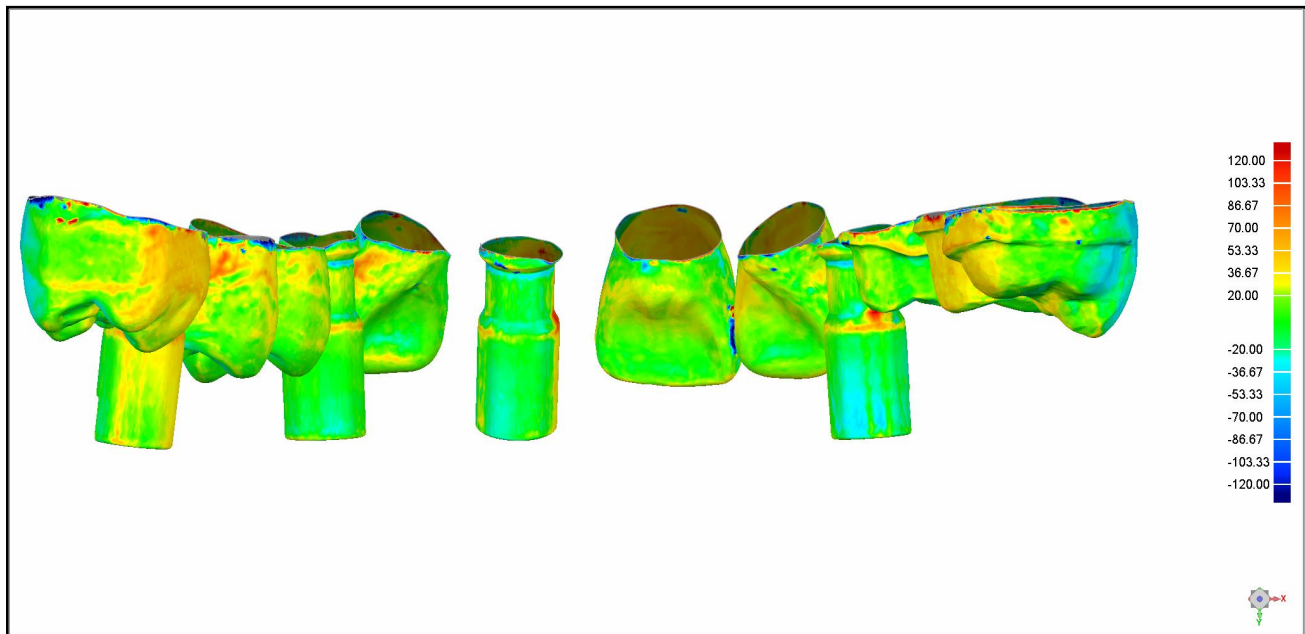

Supplement: S3 (10.1371/journal.pone.0202916.s003) [file journal.pone.0202916.s003]
