# Supplementary material for: Accuracy of four digital scanners according to scanning strategy in complete-arch impressions
Source: PLOS journal article supplement (doi:10.1371/journal.pone.0202916), 2018-09-13

### 3D Comparación Resultados

|                       |        |
|-----------------------|--------|
| Modelo referencia     | MRC    |
| Modelo test           | 3S5C   |
| Nº de puntos de datos | 103444 |
| # Aislados            | 87     |

|                 |               |
|-----------------|---------------|
| Tipo tolerancia | 3D desviación |
| Unidades        | u             |
| Máx. crítico    | 120.00        |
| Máx. nominal    | 17.00         |
| Mín. nominal    | -17.00        |
| Mín. crítico    | -120.00       |

|                          |               |
|--------------------------|---------------|
| Desviación               |               |
| Desviación superior máx. | 3133.67       |
| Desviación inferior máx. | -3126.26      |
| Desviación media         | 61.05 /-53.08 |
| Desviación estándar      | 202.45        |

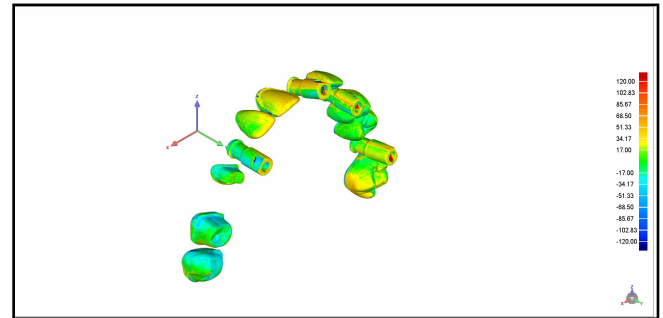

#### Distribución desviación

| >=Min   | <Max    | # Puntos | %     |
|---------|---------|----------|-------|
| -120.00 | -102.83 | 286      | 0.28  |
| -102.83 | -85.67  | 342      | 0.33  |
| -85.67  | -68.50  | 589      | 0.57  |
| -68.50  | -51.33  | 1122     | 1.08  |
| -51.33  | -34.17  | 3962     | 3.83  |
| -34.17  | -17.00  | 12096    | 11.69 |
| -17.00  | 17.00   | 45672    | 44.15 |
| 17.00   | 34.17   | 20479    | 19.80 |
| 34.17   | 51.33   | 8262     | 7.99  |
| 51.33   | 68.50   | 2704     | 2.61  |
| 68.50   | 85.67   | 1089     | 1.05  |
| 85.67   | 102.83  | 554      | 0.54  |
| 102.83  | 120.00  | 371      | 0.36  |

|                            |      |      |
|----------------------------|------|------|
| Fuera del crítico superior | 3908 | 3.78 |
| Fuera del crítico inferior | 2008 | 1.94 |

Distribución desviación

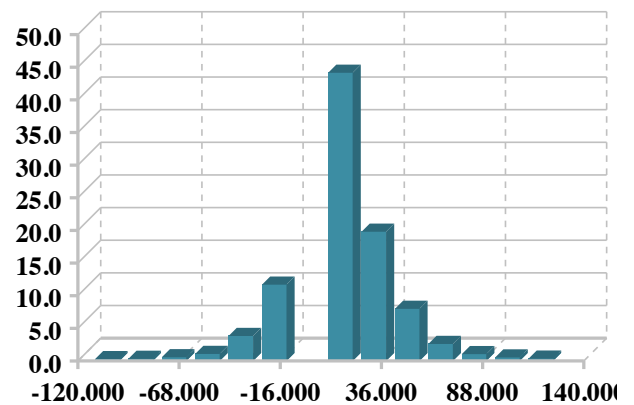

#### Desviaciones estándar

| Distribución (+/-)   | # Puntos | %     |
|----------------------|----------|-------|
| -6 * Desv. estándar. | 541      | 0.52  |
| -5 * Desv. estándar. | 131      | 0.13  |
| -4 * Desv. estándar. | 134      | 0.13  |
| -3 * Desv. estándar. | 173      | 0.17  |
| -2 * Desv. estándar. | 454      | 0.44  |
| -1 * Desv. estándar. | 64909    | 62.75 |
| 1 * Desv. estándar.  | 34378    | 33.23 |
| 2 * Desv. estándar.  | 697      | 0.67  |
| 3 * Desv. estándar.  | 339      | 0.33  |
| 4 * Desv. estándar.  | 381      | 0.37  |
| 5 * Desv. estándar.  | 373      | 0.36  |
| 6 * Desv. estándar.  | 934      | 0.90  |

Desviaciones estándar

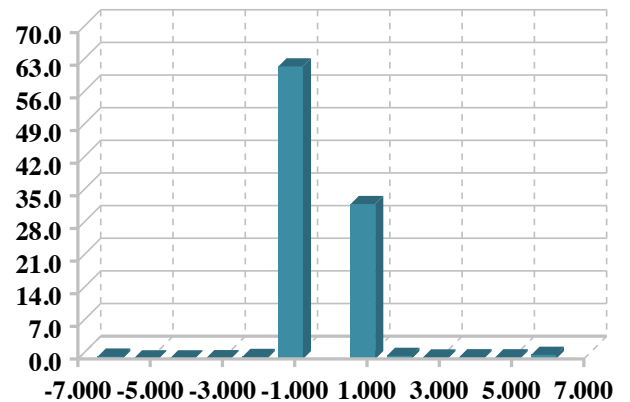

Predefinido: Isométrico

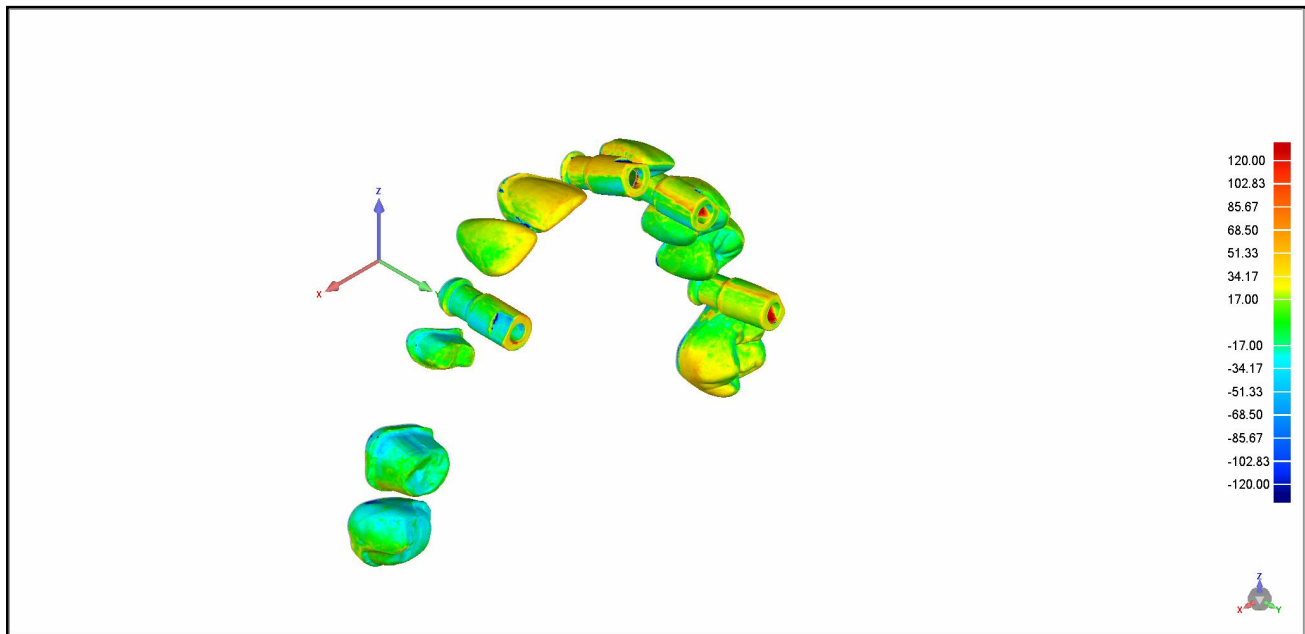

Predefinido: Frente

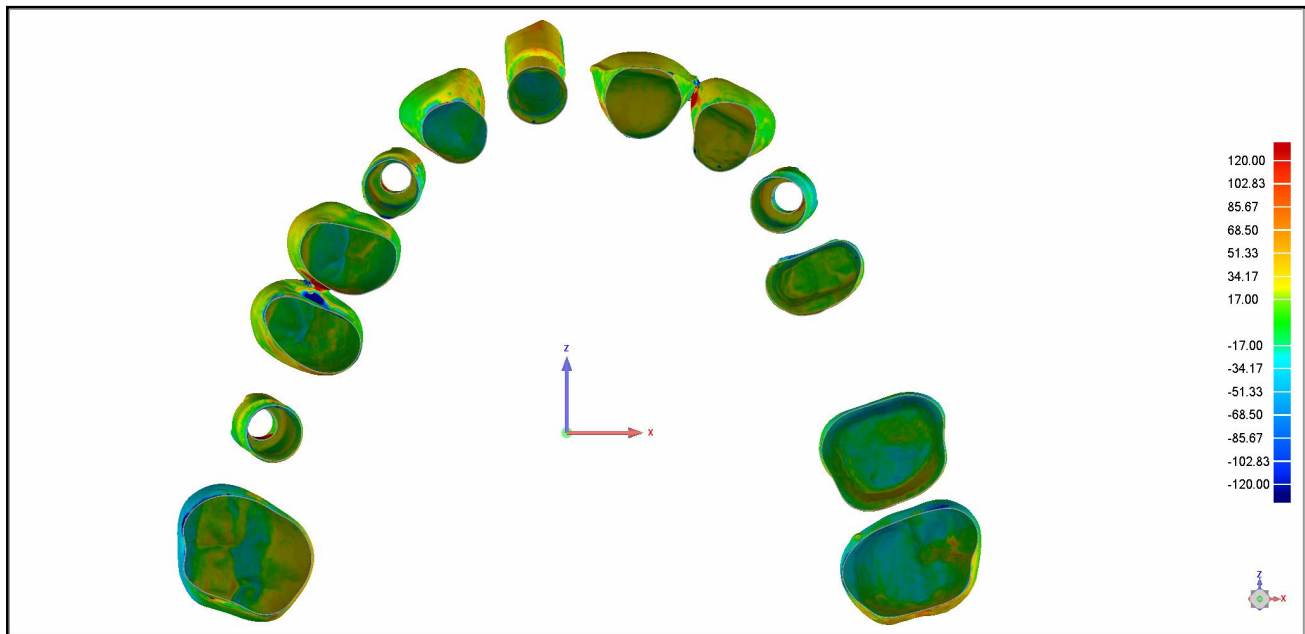

Predefinido: Atrás

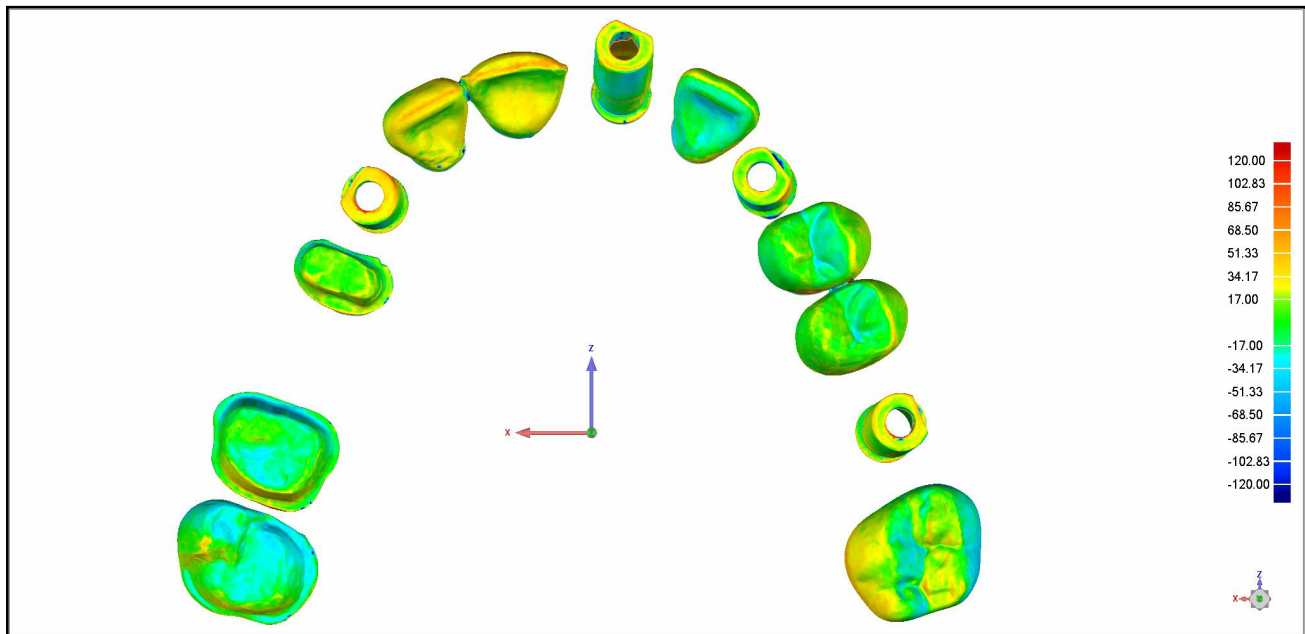

Predefinido: Izquierda

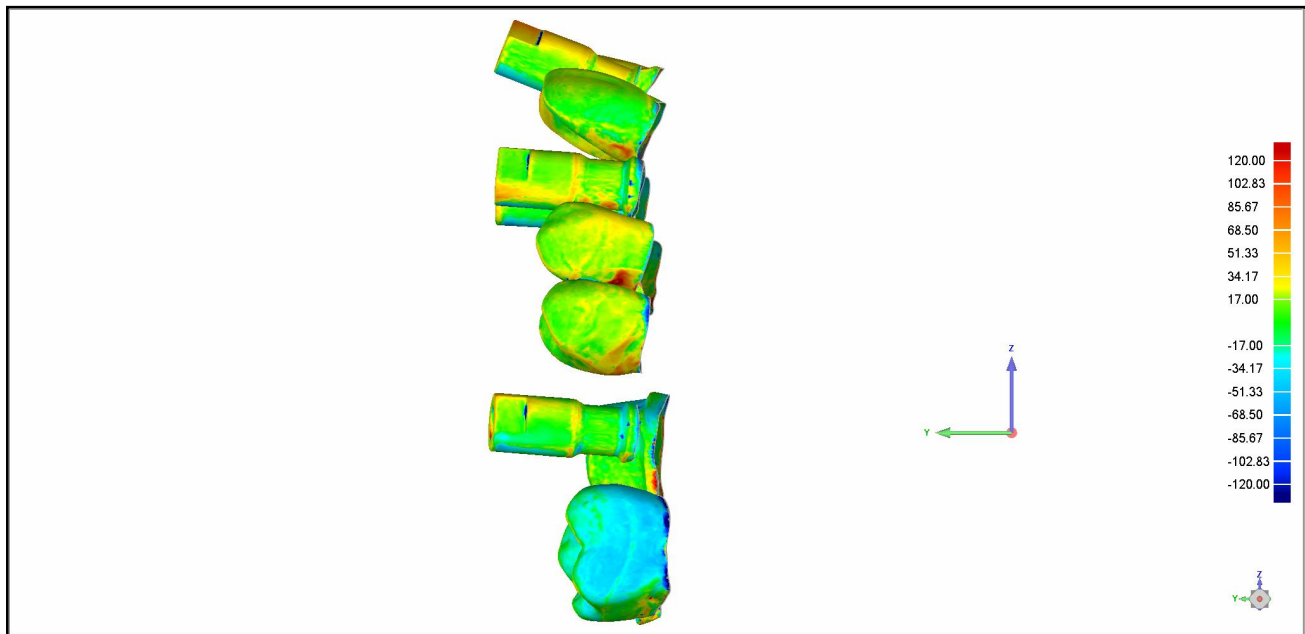

Predefinido: Derecha

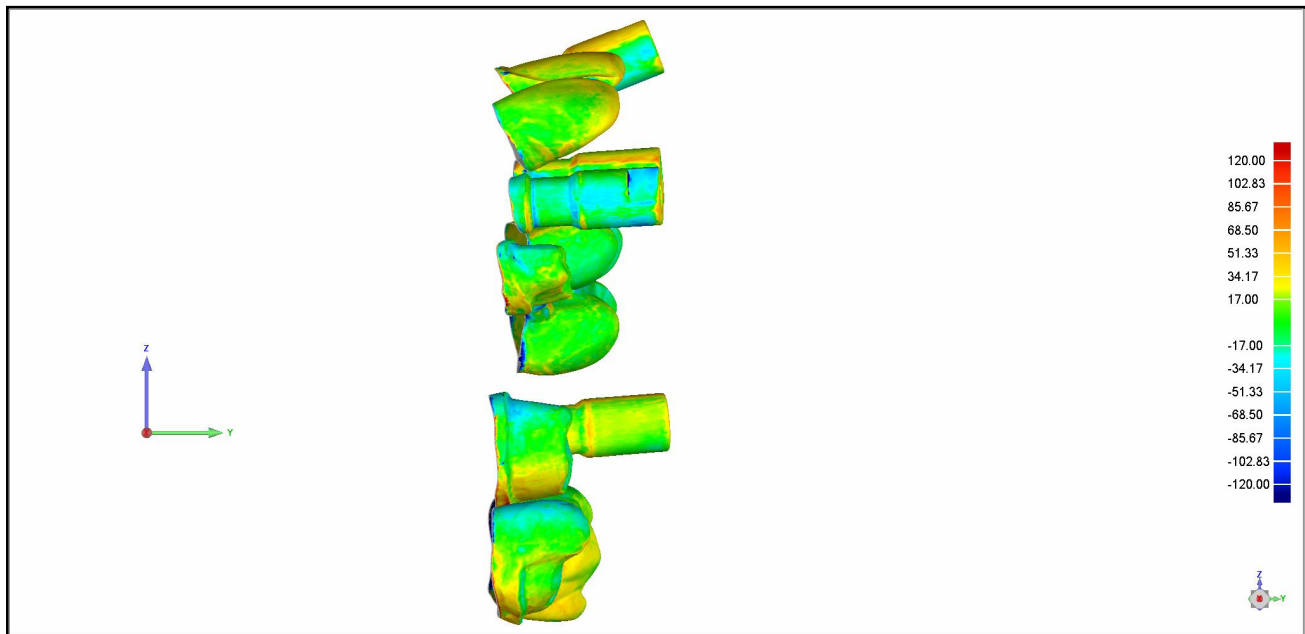

Predefinido: Superior

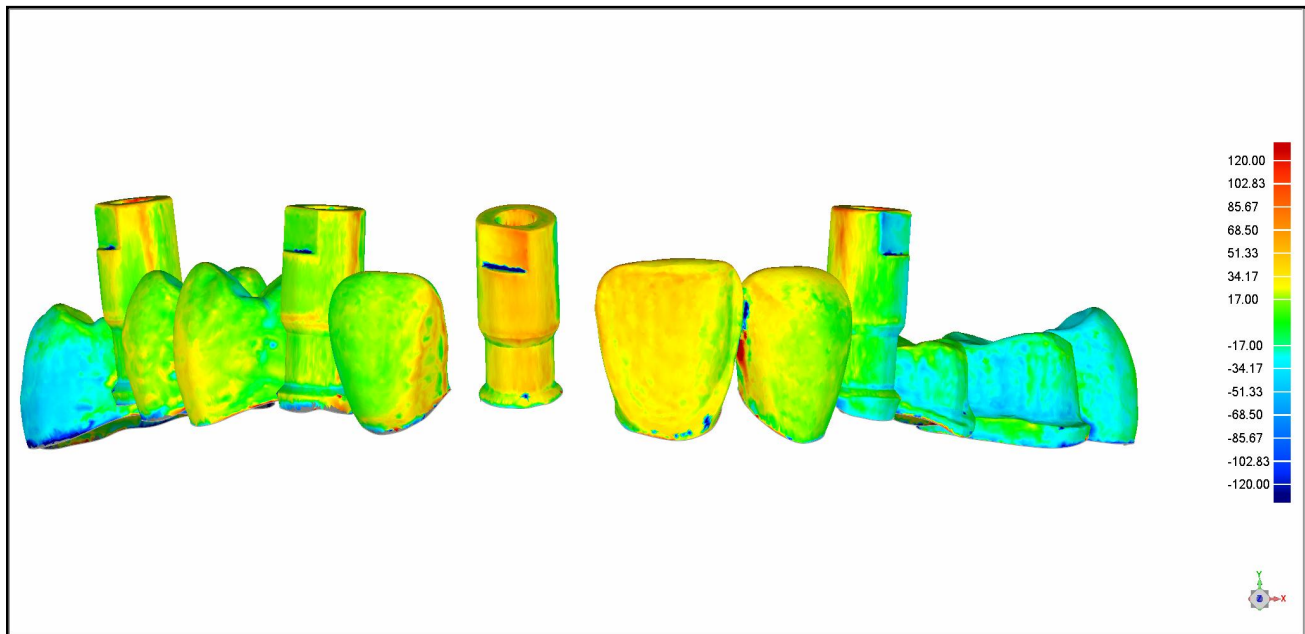

Predefinido: Inferior

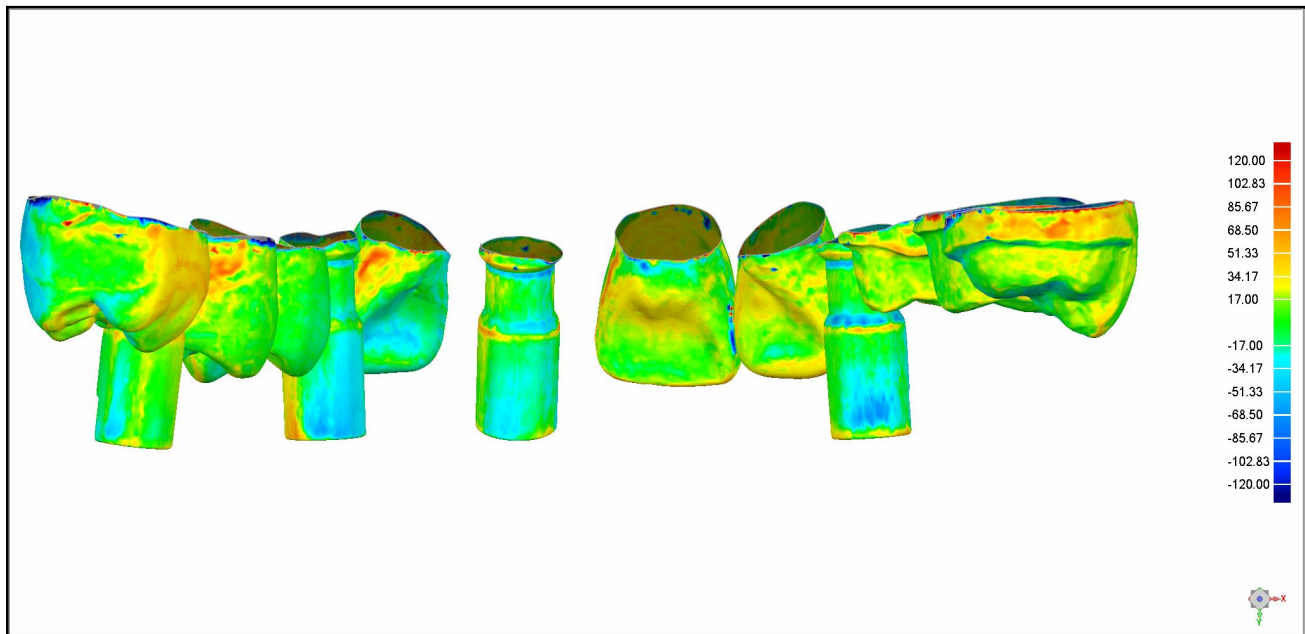

Supplement: S3 (10.1371/journal.pone.0202916.s003) [file journal.pone.0202916.s003]
