# Supplementary material for: Accuracy of four digital scanners according to scanning strategy in complete-arch impressions
Source: PLOS journal article supplement (doi:10.1371/journal.pone.0202916), 2018-09-13

### 3D Comparación Resultados

|                       |       |
|-----------------------|-------|
| Modelo referencia     | MRC   |
| Modelo test           | 3S1C  |
| Nº de puntos de datos | 99410 |
| # Aislados            | 77    |

|                 |               |
|-----------------|---------------|
| Tipo tolerancia | 3D desviación |
| Unidades        | u             |
| Máx. crítico    | 120.00        |
| Máx. nominal    | 13.00         |
| Mín. nominal    | -13.00        |
| Mín. crítico    | -120.00       |

|                          |                |
|--------------------------|----------------|
| Desviación               |                |
| Desviación superior máx. | 3056.90        |
| Desviación inferior máx. | -3000.49       |
| Desviación media         | 53.62 / -66.36 |
| Desviación estándar      | 187.31         |

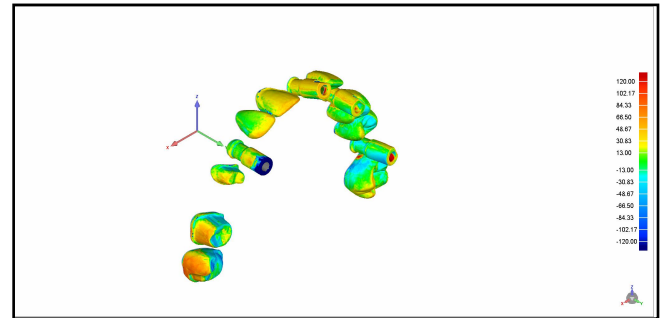

#### Distribución desviación

| >=Min   | <Max    | # Puntos | %     |
|---------|---------|----------|-------|
| -120.00 | -102.17 | 277      | 0.28  |
| -102.17 | -84.33  | 775      | 0.78  |
| -84.33  | -66.50  | 1409     | 1.42  |
| -66.50  | -48.67  | 2615     | 2.63  |
| -48.67  | -30.83  | 5127     | 5.16  |
| -30.83  | -13.00  | 10230    | 10.29 |
| -13.00  | 13.00   | 27544    | 27.71 |
| 13.00   | 30.83   | 24830    | 24.98 |
| 30.83   | 48.67   | 12749    | 12.82 |
| 48.67   | 66.50   | 5292     | 5.32  |
| 66.50   | 84.33   | 2226     | 2.24  |
| 84.33   | 102.17  | 826      | 0.83  |
| 102.17  | 120.00  | 458      | 0.46  |

|                            |      |      |
|----------------------------|------|------|
| Fuera del crítico superior | 2955 | 2.97 |
| Fuera del crítico inferior | 2097 | 2.11 |

Distribución desviación

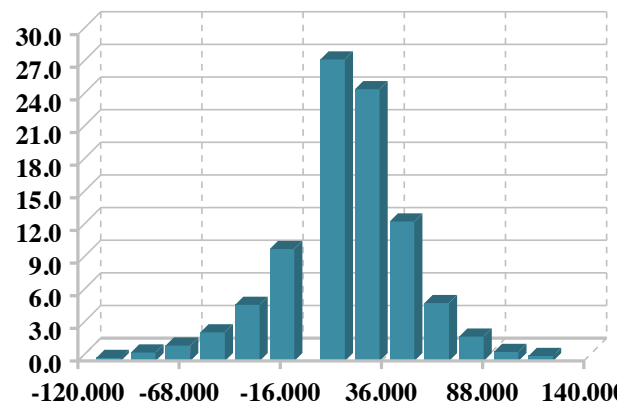

#### Desviaciones estándar

| Distribución (+/-)   | # Puntos | %     |
|----------------------|----------|-------|
| -6 * Desv. estándar. | 603      | 0.61  |
| -5 * Desv. estándar. | 201      | 0.20  |
| -4 * Desv. estándar. | 191      | 0.19  |
| -3 * Desv. estándar. | 168      | 0.17  |
| -2 * Desv. estándar. | 435      | 0.44  |
| -1 * Desv. estándar. | 49309    | 49.60 |
| 1 * Desv. estándar.  | 46374    | 46.65 |
| 2 * Desv. estándar.  | 574      | 0.58  |
| 3 * Desv. estándar.  | 273      | 0.27  |
| 4 * Desv. estándar.  | 283      | 0.28  |
| 5 * Desv. estándar.  | 259      | 0.26  |
| 6 * Desv. estándar.  | 740      | 0.74  |

Desviaciones estándar

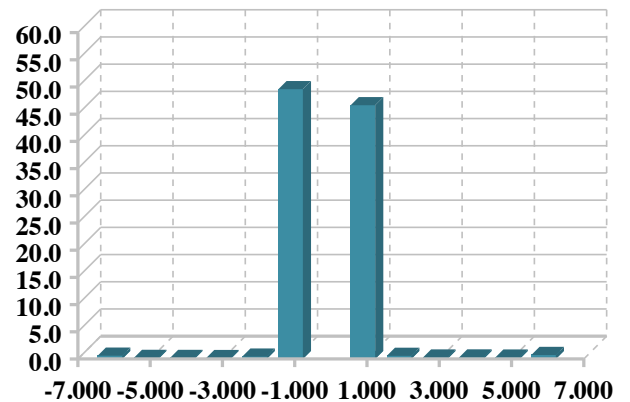

Predefinido: Isométrico

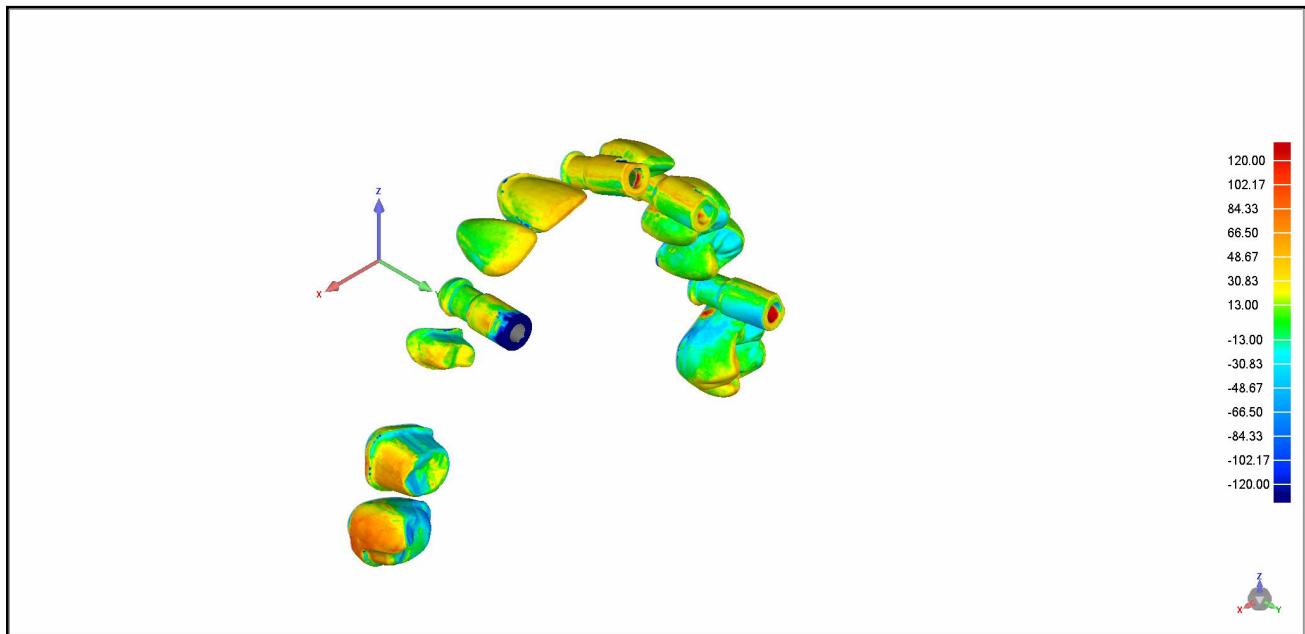

Predefinido: Frente

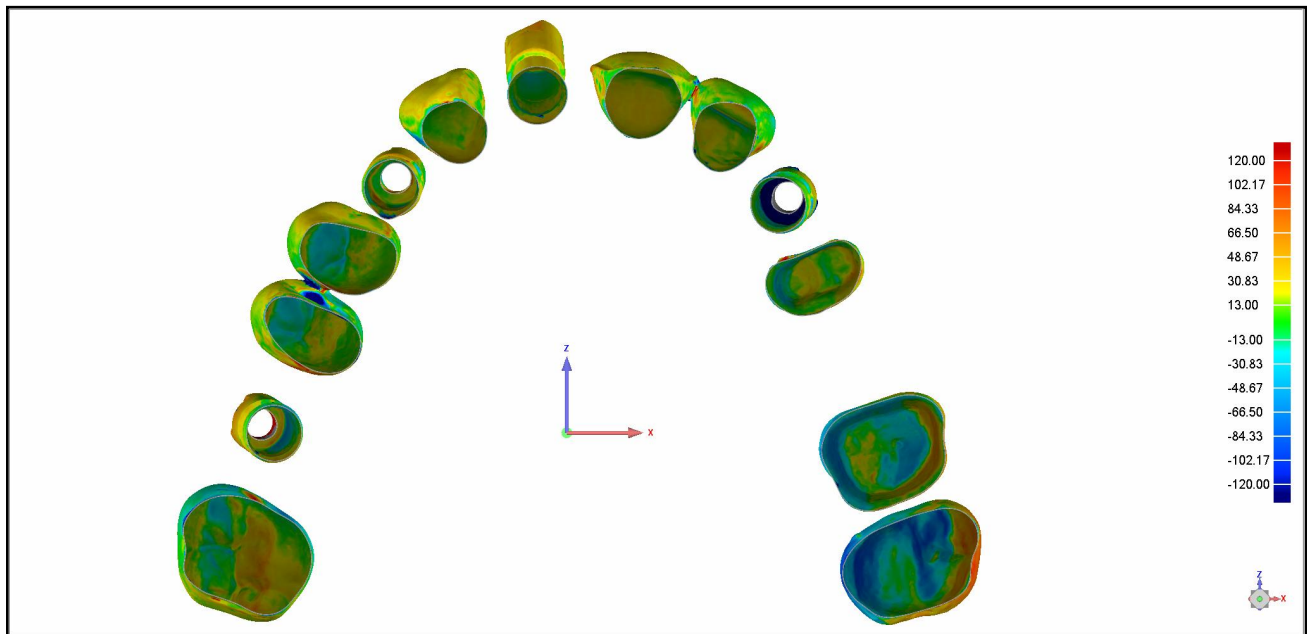

Predefinido: Atrás

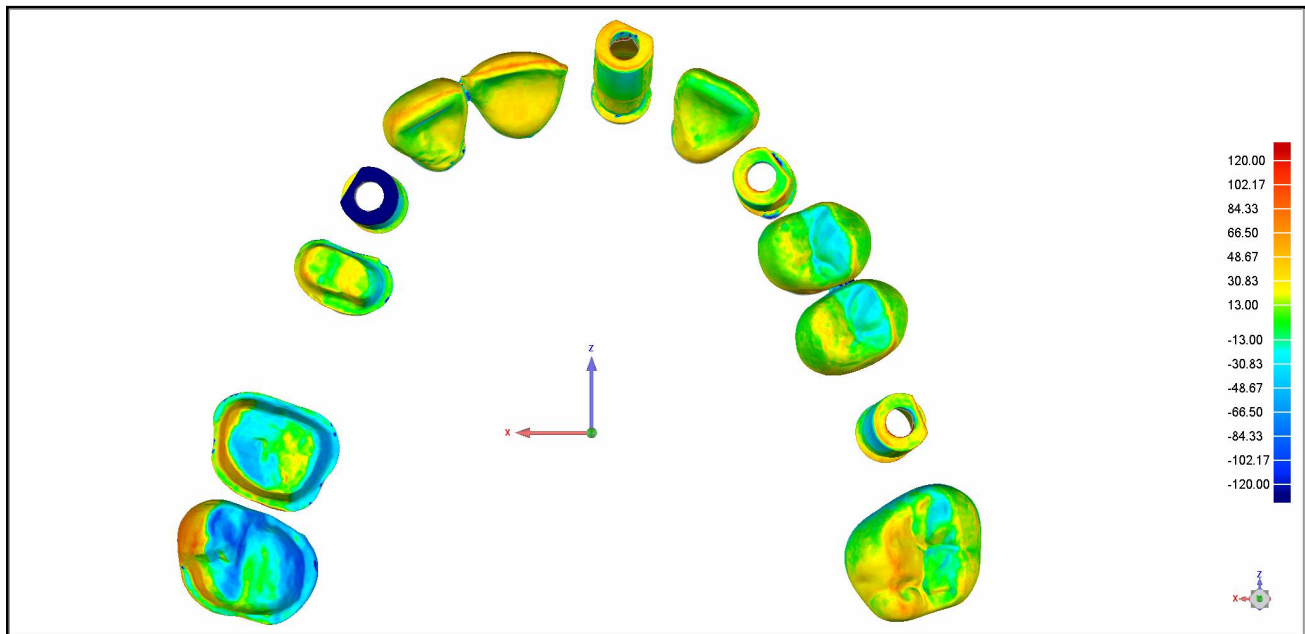

Predefinido: Izquierda

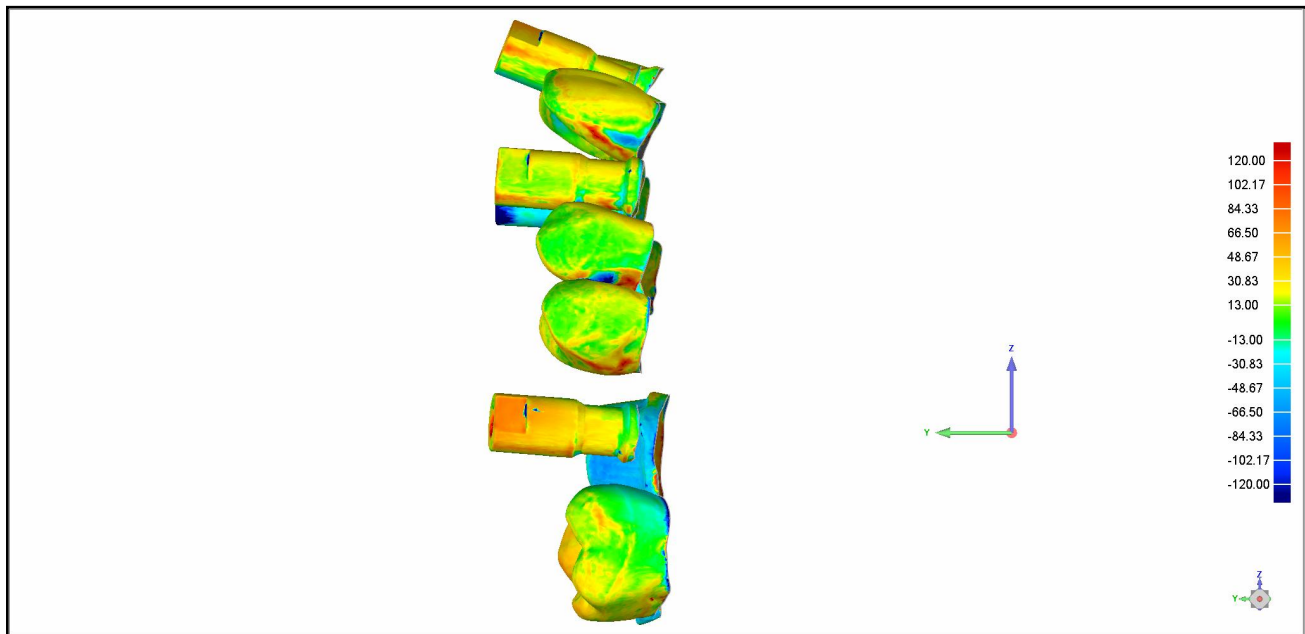

Predefinido: Derecha

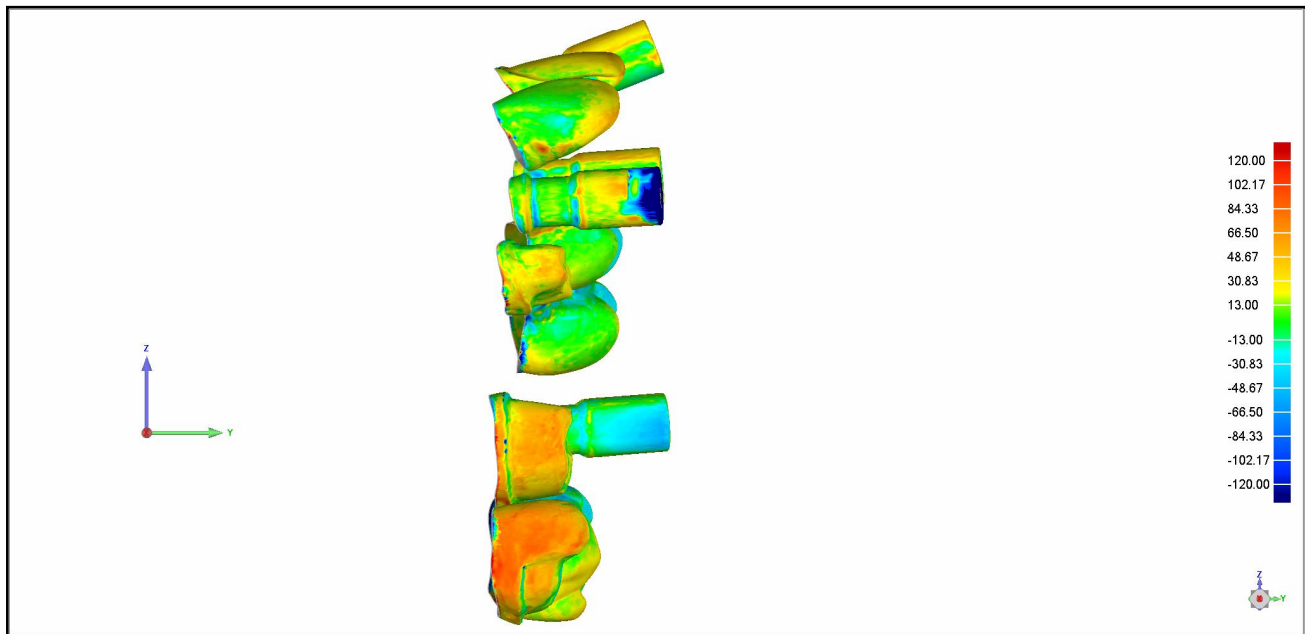

Predefinido: Superior

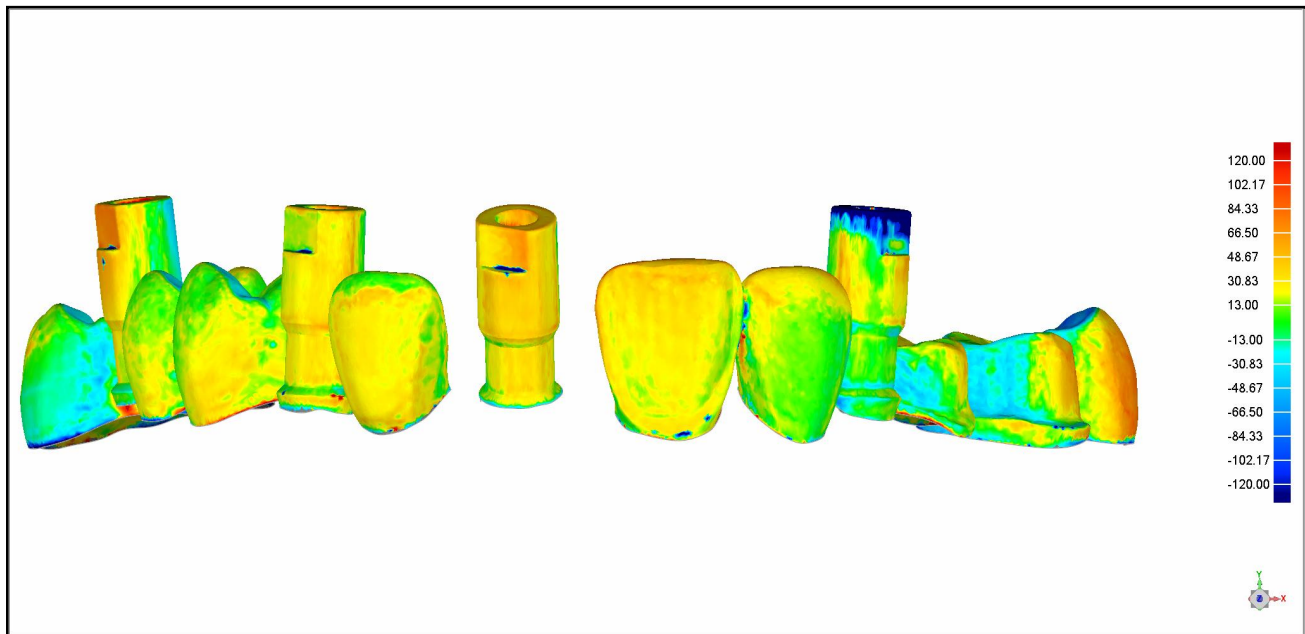

Predefinido: Inferior

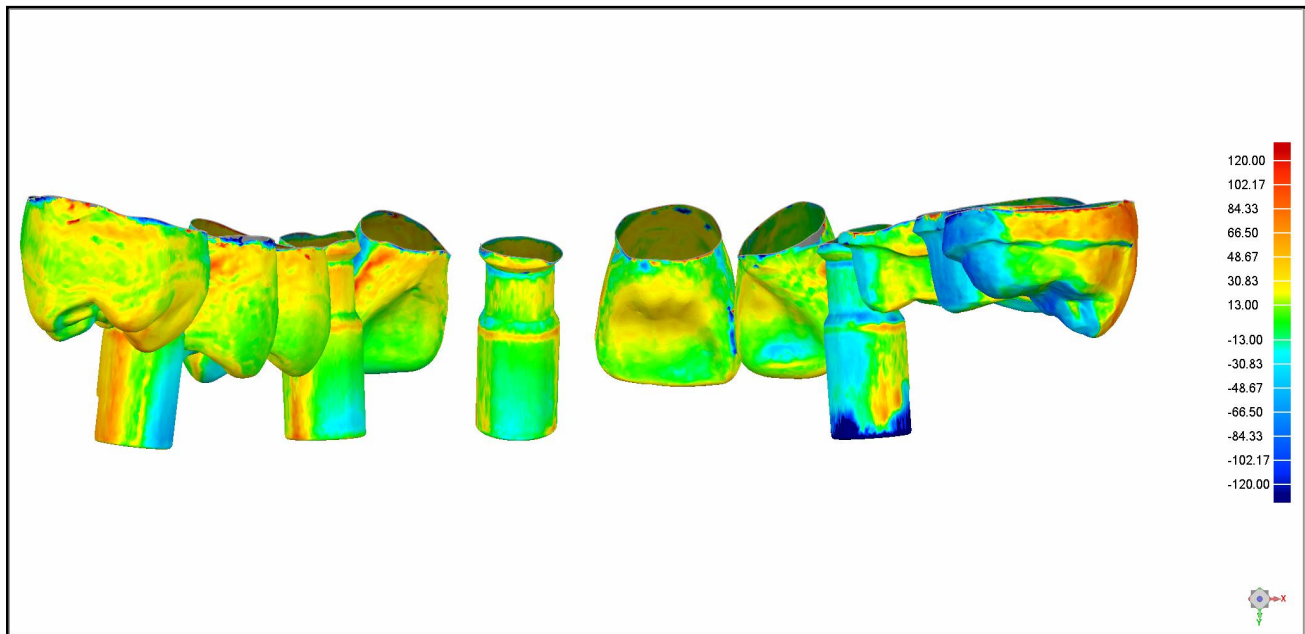

Supplement: S3 (10.1371/journal.pone.0202916.s003) [file journal.pone.0202916.s003]
