# Supplementary material for: Accuracy of four digital scanners according to scanning strategy in complete-arch impressions
Source: PubMed Central journal article supplement (PMC6136706; doi:10.1371/journal.pone.0202916), 2018-09-13
Supplement: pone.0202916.s017.pdf [file pone.0202916.s017.pdf]

Raw data manuscript: “Accuracy of four digital scanners according to scanning strategy in complete arch impressions”

Unprocess data of trueness and precisión (µm)

| Scanner | Scanning strategy | Sample | Maximum external discrepancy | Maximum internal discrepancy | Average internal discrepancy | Average external discrepancy | TRUENESS                                                         | PRECISION          |
|---------|-------------------|--------|------------------------------|------------------------------|------------------------------|------------------------------|------------------------------------------------------------------|--------------------|
|         |                   |        |                              |                              |                              |                              | Average of the mean internal and external discrepancy (no signs) | Standard deviation |
| TRIOS   | a                 | 1      | 2753,80                      | -3006,85                     | -52,65                       | 62,78                        | 57,72                                                            | 174,43             |
| TRIOS   | a                 | 2      | 2605,45                      | -2895,40                     | -43,99                       | 56,69                        | 50,34                                                            | 185,78             |
| TRIOS   | a                 | 3      | 2964,60                      | -2527,09                     | -49,42                       | 54,58                        | 52,00                                                            | 181,86             |
| TRIOS   | a                 | 4      | 3121,77                      | -2710,45                     | -45,71                       | 60,16                        | 52,94                                                            | 184,59             |
| TRIOS   | a                 | 5      | 2741,78                      | -2649,12                     | -64,30                       | 75,94                        | 70,12                                                            | 198,42             |
| TRIOS   | a                 | 6      | 2091,17                      | -2144,61                     | -49,22                       | 69,66                        | 59,44                                                            | 174,54             |
| TRIOS   | a                 | 7      | 3068,01                      | -2140,78                     | -42,41                       | 57,64                        | 50,03                                                            | 167,15             |
| TRIOS   | a                 | 8      | 2660,05                      | -2984,26                     | -59,63                       | 73,43                        | 66,53                                                            | 198,55             |
| TRIOS   | a                 | 9      | 3133,91                      | -3104,33                     | -47,28                       | 61,42                        | 54,35                                                            | 196,25             |
| TRIOS   | a                 | 10     | 3129,77                      | -2992,71                     | -48,39                       | 66,59                        | 57,49                                                            | 183,59             |
| TRIOS   | b                 | 1      | 3067,01                      | -3130,49                     | -46,72                       | 63,31                        | 55,02                                                            | 191,06             |
| TRIOS   | b                 | 2      | 3154,45                      | -2991,27                     | -51,50                       | 58,78                        | 55,14                                                            | 203,51             |
| TRIOS   | b                 | 3      | 3140,06                      | -3124,96                     | -60,61                       | 70,57                        | 65,59                                                            | 196,52             |
| TRIOS   | b                 | 4      | 3122,01                      | -3091,48                     | -46,75                       | 61,04                        | 53,90                                                            | 181,53             |
| TRIOS   | b                 | 5      | 2980,90                      | -3075,60                     | -48,11                       | 61,16                        | 54,64                                                            | 194,01             |
| TRIOS   | b                 | 6      | 3104,44                      | -3147,02                     | -50,28                       | 60,70                        | 55,49                                                            | 190,74             |
| TRIOS   | b                 | 7      | 3154,33                      | -3111,81                     | -47,21                       | 59,83                        | 53,52                                                            | 193,62             |
| TRIOS   | b                 | 8      | 3043,07                      | -3086,29                     | -44,54                       | 58,61                        | 51,58                                                            | 188,58             |

|              |   |    |         |          |         |        |        |        |
|--------------|---|----|---------|----------|---------|--------|--------|--------|
| <b>TRIOS</b> | b | 9  | 2968,28 | -3143,26 | -50,54  | 60,22  | 55,38  | 200,28 |
| <b>TRIOS</b> | b | 10 | 3151,20 | -3132,83 | -49,87  | 62,39  | 56,13  | 205,47 |
| <b>TRIOS</b> | c | 1  | 3056,90 | -3000,49 | -66,36  | 53,62  | 59,99  | 187,31 |
| <b>TRIOS</b> | c | 2  | 3014,88 | 3154,62  | -56,93  | 63,55  | 60,24  | 201,93 |
| <b>TRIOS</b> | c | 3  | 3067,57 | -3100,80 | -49,67  | 61,35  | 55,51  | 197,05 |
| <b>TRIOS</b> | c | 4  | 3153,79 | -3123,78 | -50,21  | 55,38  | 52,80  | 175,21 |
| <b>TRIOS</b> | c | 5  | 3133,67 | -3126,26 | -53,08  | 61,05  | 57,07  | 202,45 |
| <b>TRIOS</b> | c | 6  | 3095,71 | -2999,60 | -47,10  | 58,71  | 52,91  | 190,12 |
| <b>TRIOS</b> | c | 7  | 3073,71 | -3123,92 | -50,38  | 61,68  | 56,03  | 200,67 |
| <b>TRIOS</b> | c | 8  | 3110,88 | -3106,42 | -51,23  | 61,74  | 56,49  | 196,19 |
| <b>TRIOS</b> | c | 9  | 3153,61 | 3155,89  | -42,95  | 59,81  | 51,38  | 190,14 |
| <b>TRIOS</b> | c | 10 | 3039,11 | -3110,99 | -45,97  | 60,76  | 53,37  | 191,82 |
| <b>TRIOS</b> | d | 1  | 3031,69 | -3155,86 | -53,43  | 62,46  | 57,95  | 202,47 |
| <b>TRIOS</b> | d | 2  | 3121,81 | -3107,41 | 53,62   | 73,70  | 10,04  | 210,89 |
| <b>TRIOS</b> | d | 3  | 3081,99 | -3143,28 | -59,64  | 75,21  | 67,43  | 218,29 |
| <b>TRIOS</b> | d | 4  | 3088,22 | -3121,14 | -47,99  | 60,37  | 54,18  | 210,26 |
| <b>TRIOS</b> | d | 5  | 3029,34 | -3150,70 | -45,96  | 62,60  | 54,28  | 196,49 |
| <b>TRIOS</b> | d | 6  | 3083,98 | -3038,50 | -49,44  | 60,87  | 55,16  | 212,96 |
| <b>TRIOS</b> | d | 7  | 2890,23 | -3120,18 | -49,91  | 65,07  | 57,49  | 187,54 |
| <b>TRIOS</b> | d | 8  | 3041,64 | -3041,90 | -49,74  | 55,20  | 52,47  | 194,94 |
| <b>TRIOS</b> | d | 9  | 3154,10 | -3135,09 | -52,88  | 70,08  | 61,48  | 205,45 |
| <b>TRIOS</b> | d | 10 | 3155,44 | -3120,38 | -54,26  | 63,94  | 59,10  | 218,62 |
| <b>ITERO</b> | a | 1  | 3110,02 | -3107,53 | -94,23  | 98,18  | 96,21  | 210,03 |
| <b>ITERO</b> | a | 2  | 3067,66 | -2982,74 | -59,57  | 73,43  | 66,50  | 215,15 |
| <b>ITERO</b> | a | 3  | 3141,74 | -3139,97 | -176,43 | 137,77 | 157,10 | 391,69 |

|              |   |    |         |          |         |        |        |        |
|--------------|---|----|---------|----------|---------|--------|--------|--------|
| <b>ITERO</b> | a | 4  | 3148,78 | -3137,74 | -95,76  | 99,42  | 97,59  | 297,42 |
| <b>ITERO</b> | a | 5  | 3141,18 | -3149,01 | -104,59 | 115,38 | 109,99 | 304,34 |
| <b>ITERO</b> | a | 6  | 3136,93 | -3095,59 | -74,81  | 91,90  | 83,36  | 236,41 |
| <b>ITERO</b> | a | 7  | 3139,95 | -3126,84 | -122,67 | 120,67 | 121,67 | 252,13 |
| <b>ITERO</b> | a | 8  | 3155,17 | -2705,88 | -111,08 | 113,48 | 112,28 | 248,13 |
| <b>ITERO</b> | a | 9  | 3132,51 | -3145,68 | -106,56 | 112,28 | 109,42 | 249,99 |
| <b>ITERO</b> | a | 10 | 3063,25 | -3151,99 | -115,06 | 130,45 | 122,76 | 293,17 |
| <b>ITERO</b> | b | 1  | 3140,90 | -3140,18 | -128,78 | 117,20 | 122,99 | 311,30 |
| <b>ITERO</b> | b | 2  | 3139,42 | -3147,73 | -62,70  | 87,26  | 74,98  | 236,07 |
| <b>ITERO</b> | b | 3  | 3138,42 | -3082,57 | -131,88 | 127,68 | 129,78 | 286,43 |
| <b>ITERO</b> | b | 4  | 3143,93 | -3148,61 | -103,50 | 105,90 | 104,70 | 260,45 |
| <b>ITERO</b> | b | 5  | 3093,77 | -3121,70 | -108,07 | 124,74 | 116,41 | 258,56 |
| <b>ITERO</b> | b | 6  | 3141,80 | -3151,63 | -116,86 | 107,12 | 111,99 | 309,77 |
| <b>ITERO</b> | b | 7  | 3035,99 | -3118,16 | -91,39  | 101,21 | 96,30  | 231,29 |
| <b>ITERO</b> | b | 8  | 3140,14 | -3152,67 | -112,76 | 107,11 | 109,94 | 304,68 |
| <b>ITERO</b> | b | 9  | 3154,25 | -3094,08 | -109,59 | 103,31 | 106,45 | 275,24 |
| <b>ITERO</b> | b | 10 | 3058,84 | -3131,42 | -82,67  | 96,01  | 89,34  | 248,38 |
| <b>ITERO</b> | c | 1  | 3153,09 | -3132,13 | -86,01  | 100,91 | 93,46  | 283,84 |
| <b>ITERO</b> | c | 2  | 3136,54 | -3153,30 | -81,22  | 94,94  | 88,08  | 261,25 |
| <b>ITERO</b> | c | 3  | 3082,23 | -3100,14 | -78,99  | 91,92  | 85,46  | 243,10 |
| <b>ITERO</b> | c | 4  | 3135,34 | -3149,27 | -61,89  | 82,88  | 72,39  | 233,64 |
| <b>ITERO</b> | c | 5  | 3153,90 | -3119,98 | -94,39  | 87,52  | 90,96  | 238,05 |
| <b>ITERO</b> | c | 6  | 3020,04 | -2936,00 | -91,26  | 106,41 | 98,84  | 238,28 |
| <b>ITERO</b> | c | 7  | 3078,35 | -3126,61 | -94,38  | 100,10 | 97,24  | 241,49 |
| <b>ITERO</b> | c | 8  | 3089,98 | -3128,10 | -98,11  | 114,75 | 106,43 | 262,22 |

|                |   |    |         |          |         |        |        |        |
|----------------|---|----|---------|----------|---------|--------|--------|--------|
| <b>ITERO</b>   | c | 9  | 3109,55 | -3092,22 | -78,96  | 91,16  | 85,06  | 238,29 |
| <b>ITERO</b>   | c | 10 | 3135,48 | -3129,83 | -63,78  | 83,61  | 73,70  | 240,24 |
| <b>ITERO</b>   | d | 1  | 3154,62 | -3068,41 | -60,42  | 68,70  | 64,56  | 182,67 |
| <b>ITERO</b>   | d | 2  | 3044,83 | -3136,98 | -66,07  | 68,51  | 67,29  | 195,70 |
| <b>ITERO</b>   | d | 3  | 3036,73 | -3112,52 | -83,01  | 80,09  | 81,55  | 202,61 |
| <b>ITERO</b>   | d | 4  | 2553,33 | -2786,84 | -65,48  | 71,08  | 68,28  | 157,17 |
| <b>ITERO</b>   | d | 5  | 3154,97 | -3152,97 | -76,90  | 81,84  | 79,37  | 246,49 |
| <b>ITERO</b>   | d | 6  | 3143,08 | -3139,71 | -72,82  | 93,18  | 83,00  | 216,13 |
| <b>ITERO</b>   | d | 7  | 3021,46 | -3134,08 | -83,06  | 96,59  | 89,83  | 211,62 |
| <b>ITERO</b>   | d | 8  | 2912,14 | -3123,49 | -66,57  | 67,42  | 67,00  | 192,50 |
| <b>ITERO</b>   | d | 9  | 3145,24 | -3084,76 | -67,03  | 72,46  | 69,75  | 165,49 |
| <b>ITERO</b>   | d | 10 | 2681,40 | -3145,40 | -70,55  | 87,87  | 79,21  | 201,28 |
| <b>OMNICAM</b> | a | 1  | 3111,40 | -3057,69 | -89,68  | 108,77 | 99,23  | 221,99 |
| <b>OMNICAM</b> | a | 2  | 3075,82 | -3150,40 | -81,87  | 101,82 | 91,85  | 268,01 |
| <b>OMNICAM</b> | a | 3  | 3041,26 | -3125,26 | -102,87 | 106,36 | 104,62 | 282,41 |
| <b>OMNICAM</b> | a | 4  | 3132,29 | -3071,90 | -116,45 | 105,72 | 111,09 | 298,41 |
| <b>OMNICAM</b> | a | 5  | 3143,44 | -3138,92 | -127,36 | 128,10 | 127,73 | 299,87 |
| <b>OMNICAM</b> | a | 6  | 3154,90 | -3134,85 | -91,27  | 95,25  | 93,26  | 288,64 |
| <b>OMNICAM</b> | a | 7  | 2728,10 | -2945,49 | -100,39 | 111,48 | 105,94 | 209,95 |
| <b>OMNICAM</b> | a | 8  | 3131,71 | -3115,08 | -72,76  | 93,69  | 83,23  | 212,76 |
| <b>OMNICAM</b> | a | 9  | 3149,70 | -3129,55 | -122,10 | 101,18 | 111,64 | 283,96 |
| <b>OMNICAM</b> | a | 10 | 3147,10 | -3132,06 | -99,39  | 95,26  | 97,33  | 235,28 |
| <b>OMNICAM</b> | b | 1  | 3097,97 | -3145,62 | -88,02  | 90,74  | 89,38  | 251,71 |
| <b>OMNICAM</b> | b | 2  | 2918,70 | -3154,80 | -99,11  | 94,76  | 96,94  | 283,63 |
| <b>OMNICAM</b> | b | 3  | 3034,78 | -3143,34 | -101,57 | 100,42 | 101,00 | 274,37 |

|                |   |    |         |          |         |        |        |        |
|----------------|---|----|---------|----------|---------|--------|--------|--------|
| <b>OMNICAM</b> | b | 4  | 3154,69 | -3155,11 | -115,36 | 108,68 | 112,02 | 307,49 |
| <b>OMNICAM</b> | b | 5  | 3062,45 | -3106,46 | -68,44  | 82,15  | 75,30  | 215,85 |
| <b>OMNICAM</b> | b | 6  | 3116,20 | -3144,68 | -71,72  | 100,08 | 85,90  | 235,39 |
| <b>OMNICAM</b> | b | 7  | 3092,85 | -3121,55 | -75,69  | 95,56  | 85,63  | 191,23 |
| <b>OMNICAM</b> | b | 8  | 2999,42 | -3134,65 | -91,54  | 100,62 | 96,08  | 237,10 |
| <b>OMNICAM</b> | b | 9  | 3146,26 | -3153,53 | -66,01  | 83,64  | 74,83  | 221,41 |
| <b>OMNICAM</b> | b | 10 | 3146,97 | -3144,80 | -65,25  | 84,18  | 74,72  | 218,71 |
| <b>OMNICAM</b> | c | 1  | 3109,52 | -3154,15 | -105,92 | 105,23 | 105,58 | 293,56 |
| <b>OMNICAM</b> | c | 2  | 3134,81 | -3147,44 | -103,40 | 121,90 | 112,65 | 273,72 |
| <b>OMNICAM</b> | c | 3  | 3140,05 | -3155,28 | -91,59  | 93,59  | 92,59  | 277,08 |
| <b>OMNICAM</b> | c | 4  | 3145,69 | -3148,88 | -74,76  | 99,67  | 87,22  | 235,64 |
| <b>OMNICAM</b> | c | 5  | 3124,30 | -3149,24 | -78,50  | 86,78  | 82,64  | 243,41 |
| <b>OMNICAM</b> | c | 6  | 3111,58 | -3151,89 | -84,47  | 95,33  | 89,90  | 262,22 |
| <b>OMNICAM</b> | c | 7  | 3014,69 | -2982,42 | -77,52  | 90,41  | 83,97  | 238,92 |
| <b>OMNICAM</b> | c | 8  | 3146,31 | -3154,86 | -74,00  | 99,17  | 86,59  | 232,79 |
| <b>OMNICAM</b> | c | 9  | 2992,71 | -3086,35 | -109,73 | 103,04 | 106,39 | 294,70 |
| <b>OMNICAM</b> | c | 10 | 2978,00 | -3102,62 | -78,59  | 91,95  | 85,27  | 243,24 |
| <b>OMNICAM</b> | d | 1  | 3143,30 | -3153,77 | -128,60 | 110,43 | 119,52 | 327,42 |
| <b>OMNICAM</b> | d | 2  | 3113,18 | -3147,63 | -89,23  | 101,33 | 95,28  | 278,59 |
| <b>OMNICAM</b> | d | 3  | 3150,07 | -3154,29 | -112,71 | 128,42 | 120,57 | 284,17 |
| <b>OMNICAM</b> | d | 4  | 3142,13 | -2922,04 | -112,24 | 126,40 | 119,32 | 253,29 |
| <b>OMNICAM</b> | d | 5  | 3148,61 | -3145,94 | -121,55 | 116,01 | 118,78 | 291,14 |
| <b>OMNICAM</b> | d | 6  | 3123,67 | -3145,33 | -88,22  | 98,67  | 93,45  | 272,25 |
| <b>OMNICAM</b> | d | 7  | 2666,87 | -3152,31 | -100,49 | 82,66  | 91,58  | 277,80 |
| <b>OMNICAM</b> | d | 8  | 3091,72 | -3153,91 | -92,82  | 93,64  | 93,23  | 261,86 |

|                        |   |    |         |          |         |         |         |        |
|------------------------|---|----|---------|----------|---------|---------|---------|--------|
| <b>OMNICAM</b>         | d | 9  | 3150,17 | -3155,38 | -116,68 | 110,84  | 113,76  | 318,45 |
| <b>OMNICAM</b>         | d | 10 | 3117,92 | -3130,03 | -117,91 | 116,83  | 117,37  | 272,42 |
| <b>TRUE DEFINITION</b> | a | 1  | 1985,89 | -2119,41 | 40,77   | -26,64  | -33,71  | 83,77  |
| <b>TRUE DEFINITION</b> | a | 2  | 2880,78 | -3111,94 | 115,96  | -95,90  | -105,93 | 172,84 |
| <b>TRUE DEFINITION</b> | a | 3  | 2924,25 | -2699,40 | 63,14   | -53,46  | -58,30  | 86,91  |
| <b>TRUE DEFINITION</b> | a | 4  | 2413,14 | -2930,92 | 43,93   | -36,33  | -40,13  | 89,59  |
| <b>TRUE DEFINITION</b> | a | 5  | 2976,55 | -3096,48 | 126,77  | -106,47 | -116,62 | 209,94 |
| <b>TRUE DEFINITION</b> | a | 6  | 1717,20 | -1517,69 | 40,59   | -30,44  | -35,52  | 64,89  |
| <b>TRUE DEFINITION</b> | a | 7  | 2137,69 | -3087,47 | 93,53   | -85,24  | -89,39  | 145,95 |
| <b>TRUE DEFINITION</b> | a | 8  | 2503,71 | -2268,21 | 39,82   | -32,82  | -36,32  | 73,49  |
| <b>TRUE DEFINITION</b> | a | 9  | 1866,02 | -3019,21 | 50,81   | -45,61  | -48,21  | 93,62  |
| <b>TRUE DEFINITION</b> | a | 10 | 2763,99 | -2509,23 | 49,80   | -38,07  | -43,94  | 77,36  |
| <b>TRUE DEFINITION</b> | b | 1  | 2217,98 | -2513,38 | 44,30   | -37,01  | -40,66  | 87,94  |
| <b>TRUE DEFINITION</b> | b | 2  | 2396,34 | -1159,73 | 53,11   | -34,34  | -43,73  | 77,20  |
| <b>TRUE DEFINITION</b> | b | 3  | 2993,89 | -3083,23 | 124,88  | -80,30  | -102,59 | 203,24 |
| <b>TRUE DEFINITION</b> | b | 4  | 2074,58 | -1214,69 | 40,78   | -24,63  | -32,71  | 81,07  |
| <b>TRUE DEFINITION</b> | b | 5  | 2180,49 | -2921,27 | 105,85  | -69,31  | -87,58  | 168,12 |
| <b>TRUE DEFINITION</b> | b | 6  | 2680,46 | -3142,68 | 92,88   | -74,91  | -83,90  | 141,58 |

|                 |   |    |         |          |        |        |        |        |
|-----------------|---|----|---------|----------|--------|--------|--------|--------|
| TRUE DEFINITION | b | 7  | 2537,14 | -2400,03 | 54,52  | -31,77 | -43,15 | 90,87  |
| TRUE DEFINITION | b | 8  | 1913,26 | -3146,49 | 67,40  | -48,75 | -58,08 | 104,07 |
| TRUE DEFINITION | b | 9  | 2174,04 | -2089,97 | 57,19  | -42,64 | -49,92 | 89,84  |
| TRUE DEFINITION | b | 10 | 2311,62 | -2576,28 | 39,95  | -28,72 | -34,34 | 73,91  |
| TRUE DEFINITION | c | 1  | 2399,42 | -2481,72 | 35,34  | -32,99 | -34,17 | 74,02  |
| TRUE DEFINITION | c | 2  | 2230,83 | -2607,87 | 50,49  | -43,74 | -47,12 | 91,97  |
| TRUE DEFINITION | c | 3  | 2308,04 | -2127,31 | 48,63  | -36,21 | -42,42 | 84,49  |
| TRUE DEFINITION | c | 4  | 1808,04 | -2540,77 | 43,53  | -35,60 | -39,57 | 68,88  |
| TRUE DEFINITION | c | 5  | 3154,56 | -3096,94 | 51,61  | -39,99 | -45,80 | 96,91  |
| TRUE DEFINITION | c | 6  | 2340,64 | -2690,39 | 106,12 | -79,70 | -92,91 | 193,31 |
| TRUE DEFINITION | c | 7  | 2646,03 | -2692,01 | 45,23  | -30,55 | -37,89 | 84,07  |
| TRUE DEFINITION | c | 8  | 3121,59 | -2082,09 | 43,78  | -29,73 | -36,76 | 59,47  |
| TRUE DEFINITION | c | 9  | 3136,55 | -2471,00 | 50,23  | -38,24 | -44,24 | 78,54  |
| TRUE DEFINITION | c | 10 | 2999,04 | -1892,75 | 49,71  | -43,27 | -46,49 | 76,32  |
| TRUE DEFINITION | d | 1  | 2472,29 | -2522,96 | 51,67  | -35,77 | -43,72 | 73,49  |
| TRUE DEFINITION | d | 2  | 2039,06 | -2714,69 | 40,23  | -29,50 | -34,87 | 70,57  |
| TRUE DEFINITION | d | 3  | 2517,39 | -3135,62 | 51,56  | -41,11 | -46,34 | 85,28  |
| TRUE DEFINITION | d | 4  | 2729,57 | -2172,87 | 53,22  | -51,21 | -52,22 | 88,72  |

|                        |   |    |         |          |       |        |        |        |
|------------------------|---|----|---------|----------|-------|--------|--------|--------|
| <b>TRUE DEFINITION</b> | d | 5  | 2269,42 | -3040,20 | 68,91 | -70,26 | -69,59 | 108,56 |
| <b>TRUE DEFINITION</b> | d | 6  | 1885,22 | -1993,48 | 39,79 | -28,22 | -34,01 | 57,83  |
| <b>TRUE DEFINITION</b> | d | 7  | 1386,23 | -2158,66 | 39,15 | -33,24 | -36,20 | 56,64  |
| <b>TRUE DEFINITION</b> | d | 8  | 3056,40 | -2940,45 | 82,69 | -80,90 | -81,80 | 132,36 |
| <b>TRUE DEFINITION</b> | d | 9  | 2179,83 | -2038,72 | 66,52 | -44,13 | -55,33 | 97,59  |
| <b>TRUE DEFINITION</b> | d | 10 | 2224,78 | -2716,46 | 33,51 | -25,34 | -29,43 | 57,30  |
