# Supplementary material for: Accuracy of four digital scanners according to scanning strategy in complete-arch impressions
Source: PLOS journal article supplement (doi:10.1371/journal.pone.0202916), 2018-09-13
Supplement: S13 (10.1371/journal.pone.0202916.s013) [file journal.pone.0202916.s013]

### 3D Comparación Resultados

|                       |        |
|-----------------------|--------|
| Modelo referencia     | MRC    |
| Modelo test           | TD2A   |
| Nº de puntos de datos | 129107 |
| # Aislados            | 318    |

|                 |               |
|-----------------|---------------|
| Tipo tolerancia | 3D desviación |
| Unidades        | u             |
| Máx. crítico    | 120.00        |
| Máx. nominal    | 32.00         |
| Mín. nominal    | -32.00        |
| Mín. crítico    | -120.00       |

|                          |                |
|--------------------------|----------------|
| Desviación               |                |
| Desviación superior máx. | 2880.78        |
| Desviación inferior máx. | -3111.94       |
| Desviación media         | 115.96 / 95.90 |
| Desviación estándar      | 172.84         |

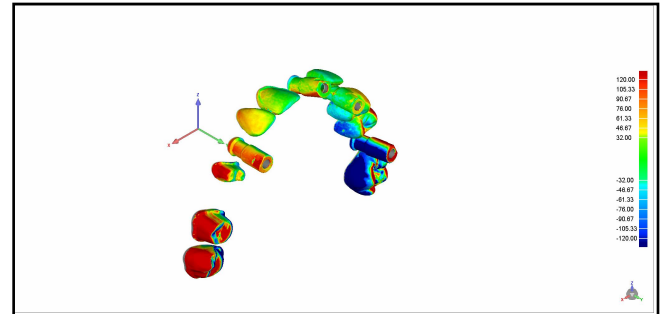

#### Distribución desviación

| >=Min   | <Max    | # Puntos | %     |
|---------|---------|----------|-------|
| -120.00 | -105.33 | 1419     | 1.10  |
| -105.33 | -90.67  | 1869     | 1.45  |
| -90.67  | -76.00  | 2266     | 1.76  |
| -76.00  | -61.33  | 2746     | 2.13  |
| -61.33  | -46.67  | 4011     | 3.11  |
| -46.67  | -32.00  | 5479     | 4.24  |
| -32.00  | 32.00   | 42576    | 32.98 |
| 32.00   | 46.67   | 9176     | 7.11  |
| 46.67   | 61.33   | 7763     | 6.01  |
| 61.33   | 76.00   | 6162     | 4.77  |
| 76.00   | 90.67   | 4222     | 3.27  |
| 90.67   | 105.33  | 3151     | 2.44  |
| 105.33  | 120.00  | 2690     | 2.08  |

|                            |       |       |
|----------------------------|-------|-------|
| Fuera del crítico superior | 22530 | 17.45 |
| Fuera del crítico inferior | 13047 | 10.11 |

Distribución desviación

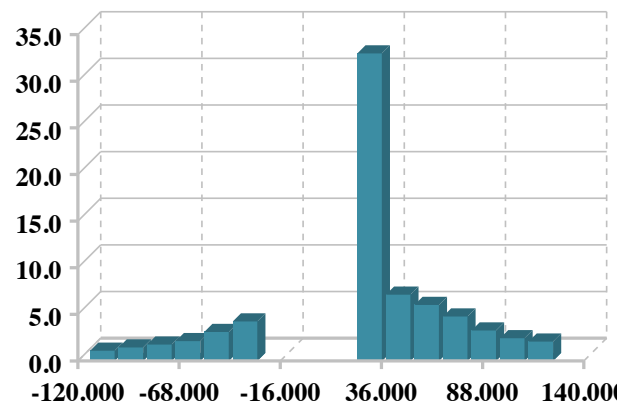

#### Desviaciones estándar

| Distribución (+/-)   | # Puntos | %     |
|----------------------|----------|-------|
| -6 * Desv. estándar. | 96       | 0.07  |
| -5 * Desv. estándar. | 71       | 0.05  |
| -4 * Desv. estándar. | 493      | 0.38  |
| -3 * Desv. estándar. | 2999     | 2.32  |
| -2 * Desv. estándar. | 7909     | 6.13  |
| -1 * Desv. estándar. | 61923    | 47.96 |
| 1 * Desv. estándar.  | 41475    | 32.12 |
| 2 * Desv. estándar.  | 8112     | 6.28  |
| 3 * Desv. estándar.  | 5637     | 4.37  |
| 4 * Desv. estándar.  | 142      | 0.11  |
| 5 * Desv. estándar.  | 66       | 0.05  |
| 6 * Desv. estándar.  | 184      | 0.14  |

Desviaciones estándar

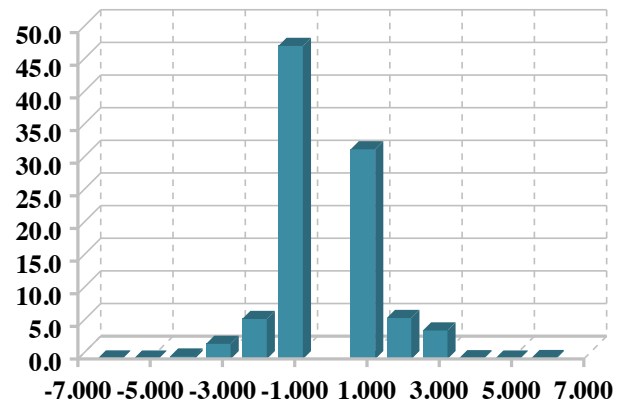

Predefinido: Isométrico

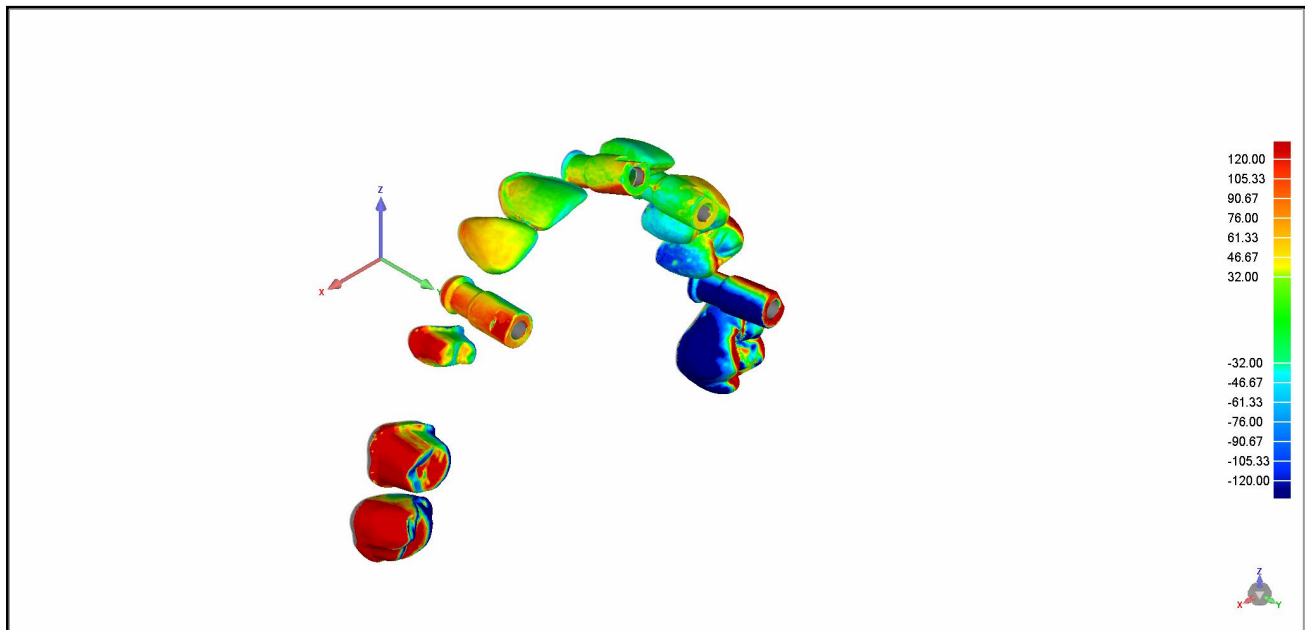

Predefinido: Frente

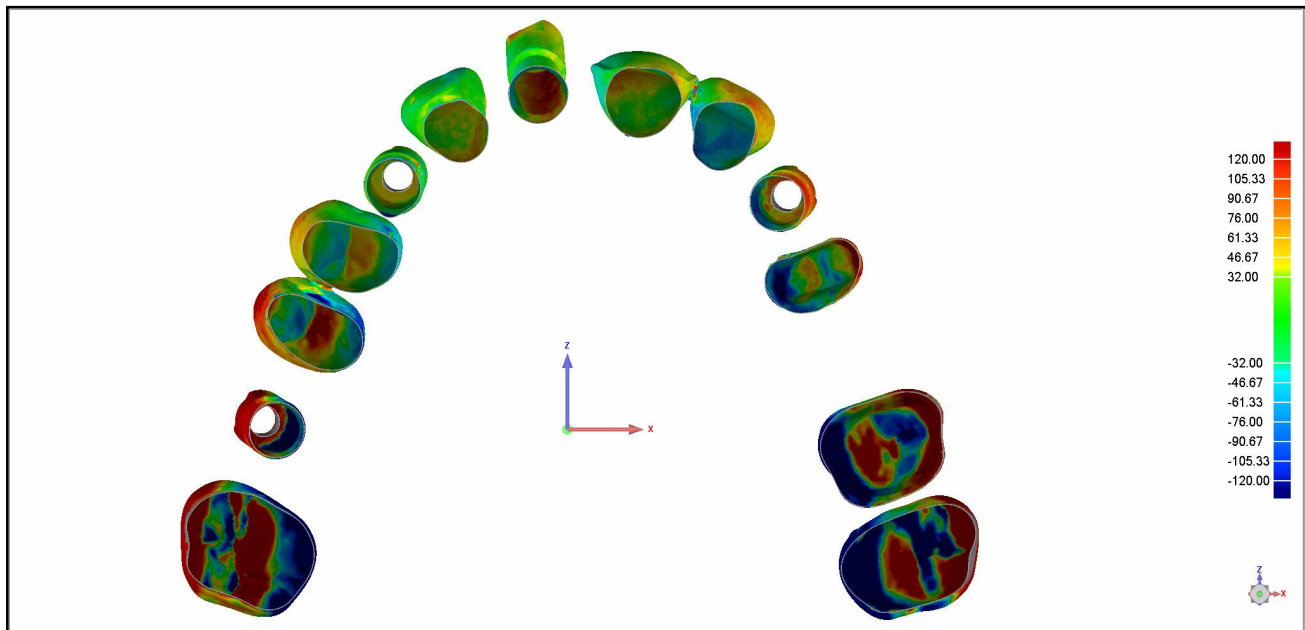

Predefinido: Atrás

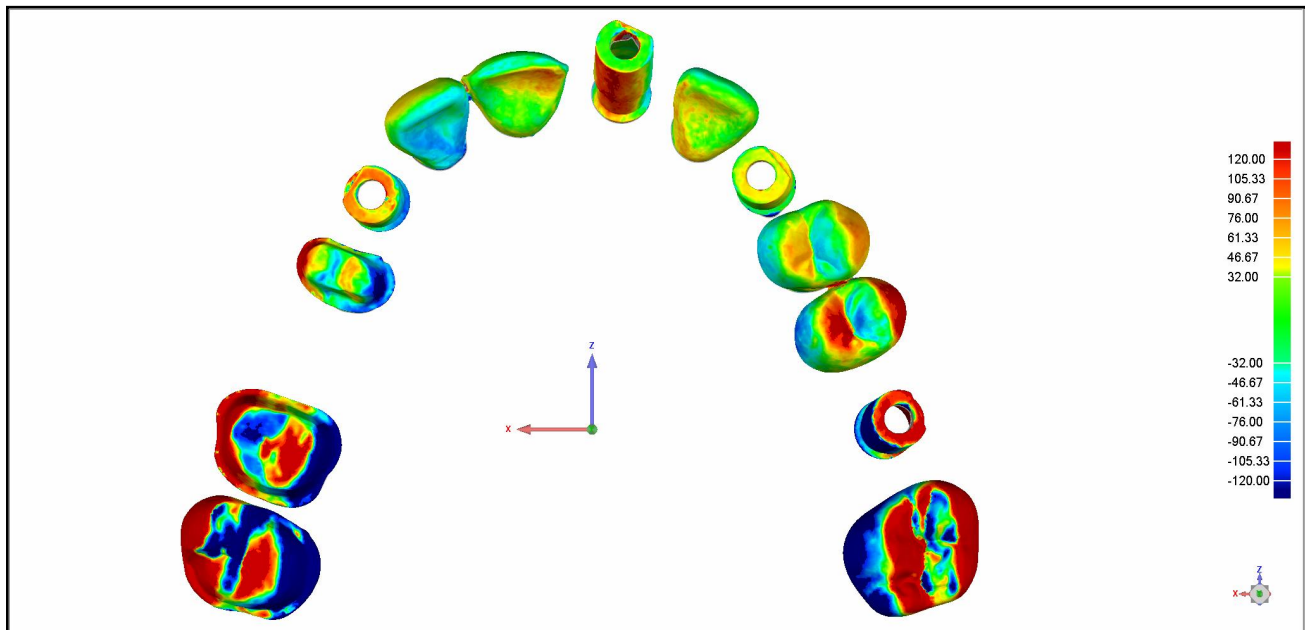

Predefinido: Izquierda

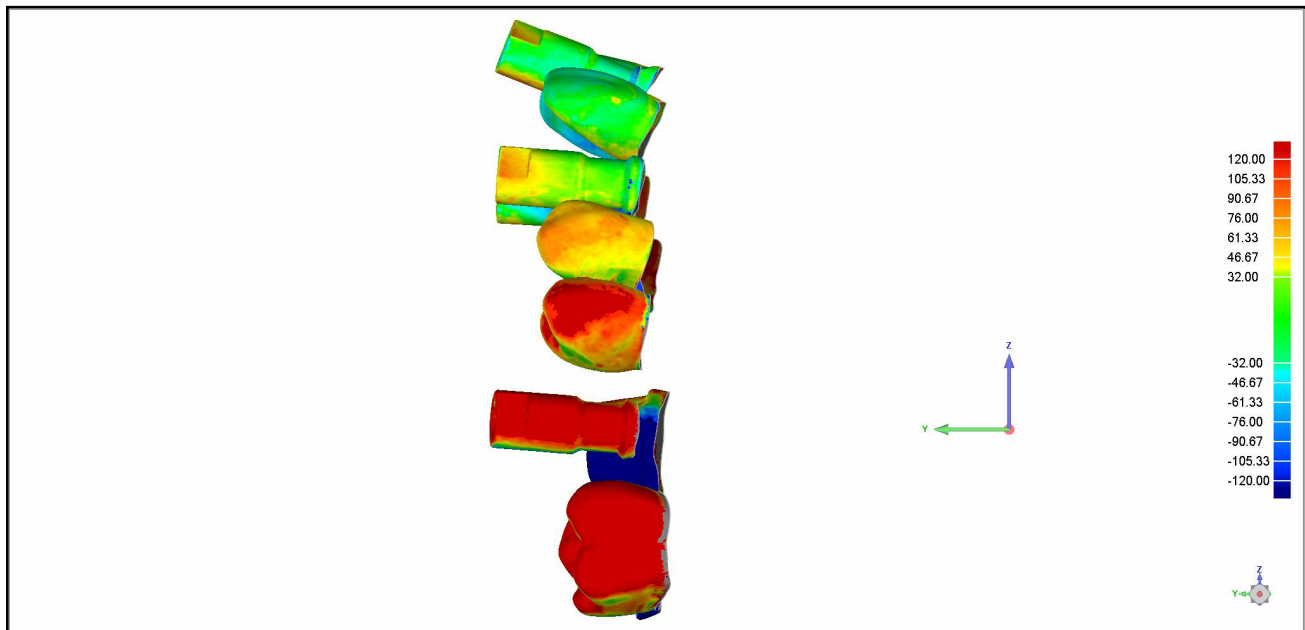

Predefinido: Derecha

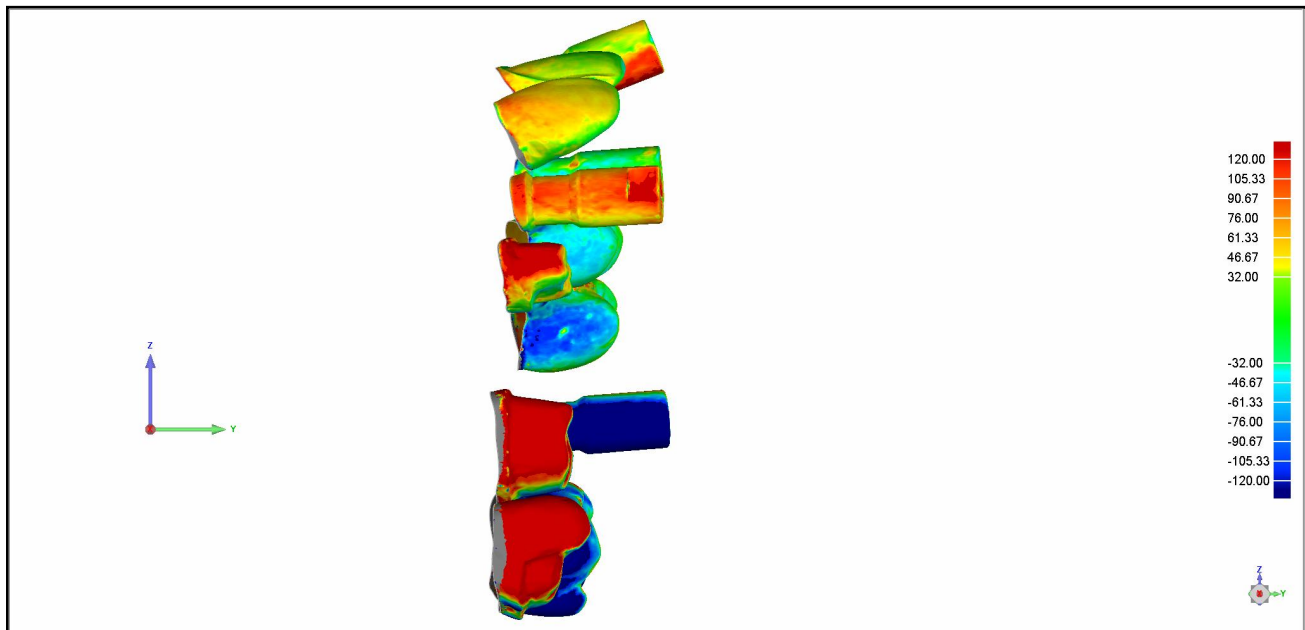

Predefinido: Superior

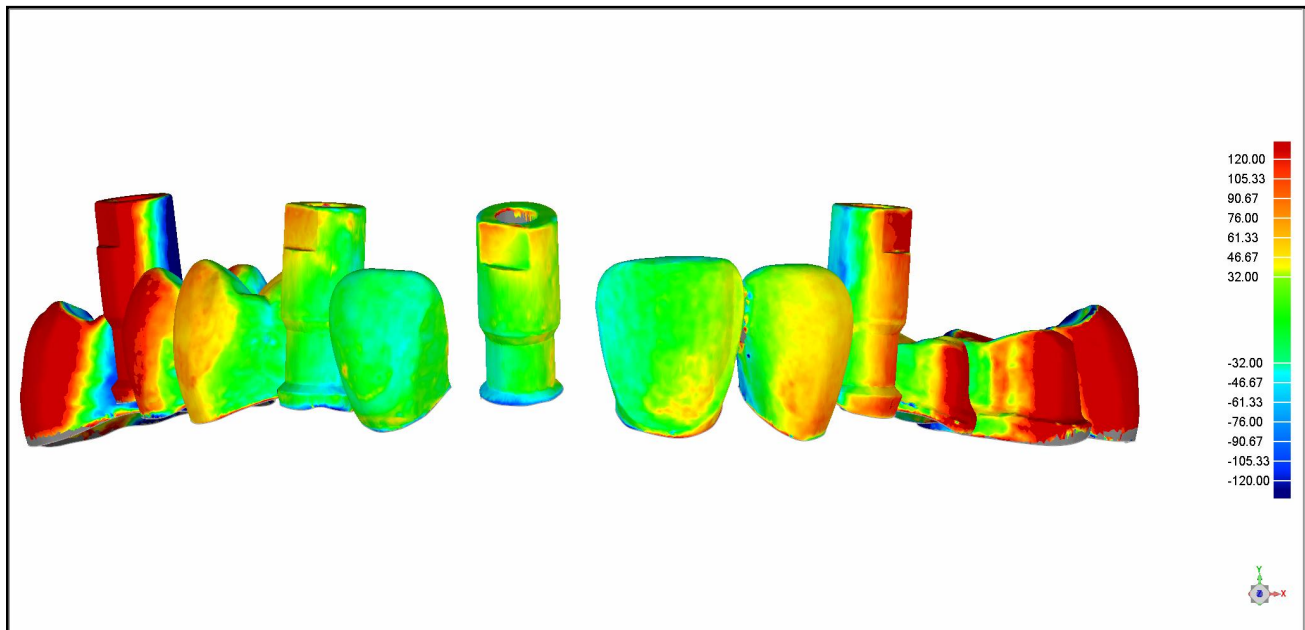

Predefinido: Inferior

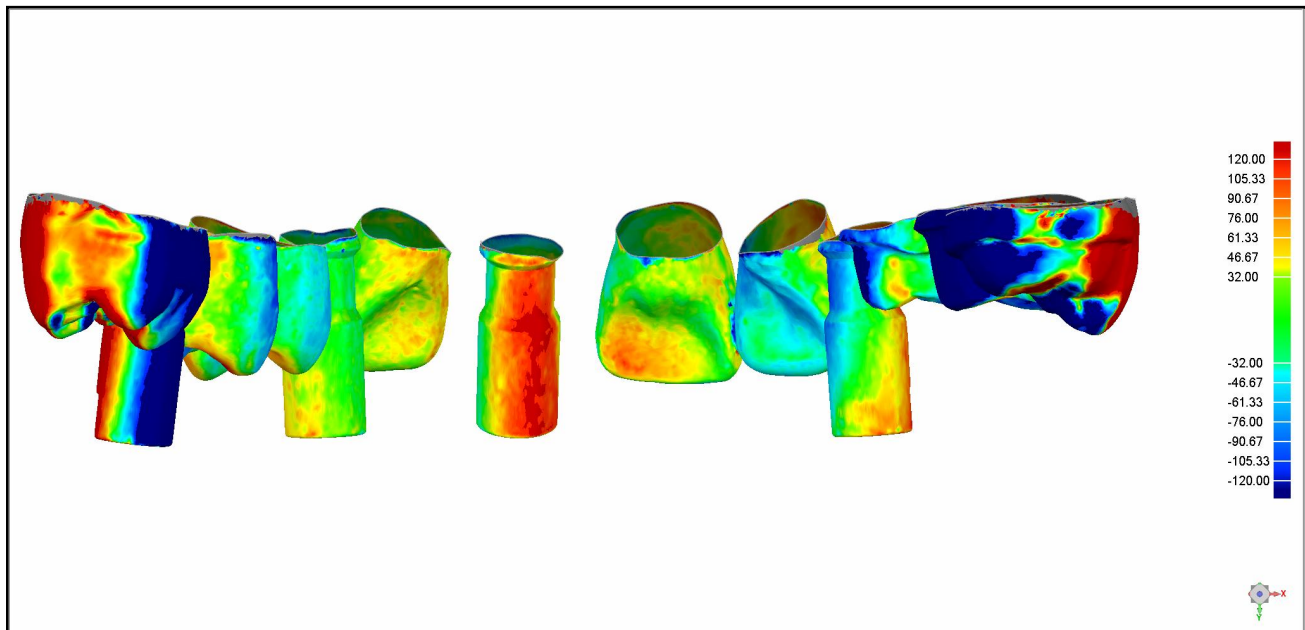



## Ajuste de ubicación: Desviaciones superior e inferior

Unidades: u

| Nombre         | Desv     | Estado | Superior Tol | Inferior Tol | Ref X    | Ref Y    | Ref Z    | Radio | Desv X   | Desv Y | Desv Z   | Medido X | Medido Y | Medido Z  | Dir. proy. X | Dir. proy. Y | Dir. proy. Z |
|----------------|----------|--------|--------------|--------------|----------|----------|----------|-------|----------|--------|----------|----------|----------|-----------|--------------|--------------|--------------|
| Desv. inferior | -3111.94 |        |              |              | 32061.00 | 27268.70 | -9389.56 | n/a   | -505.91  | 486.14 | -3031.81 | 31555.09 | 27754.85 | -12421.38 | 0.16         | -0.16        | 0.97         |
| Desv. superior | 2880.78  |        |              |              | 32263.48 | 27229.24 | -7694.37 | n/a   | -2119.88 | 283.63 | 1929.91  | 30143.59 | 27512.87 | -5764.46  | -0.74        | 0.10         | 0.67         |
