# Supplementary material for: Accuracy of four digital scanners according to scanning strategy in complete-arch impressions
Source: PLOS journal article supplement (doi:10.1371/journal.pone.0202916), 2018-09-13
Supplement: S13 (10.1371/journal.pone.0202916.s013) [file journal.pone.0202916.s013]

### 3D Comparación Resultados

|                       |        |
|-----------------------|--------|
| Modelo referencia     | MRC    |
| Modelo test           | TD6A   |
| Nº de puntos de datos | 130600 |
| # Aislados            | 396    |

|                 |               |
|-----------------|---------------|
| Tipo tolerancia | 3D desviación |
| Unidades        | u             |
| Máx. crítico    | 120.00        |
| Máx. nominal    | 9.00          |
| Mín. nominal    | -9.00         |
| Mín. crítico    | -120.00       |

|                          |                |
|--------------------------|----------------|
| Desviación               |                |
| Desviación superior máx. | 1717.20        |
| Desviación inferior máx. | -1517.69       |
| Desviación media         | 40.59 / -30.44 |
| Desviación estándar      | 64.89          |

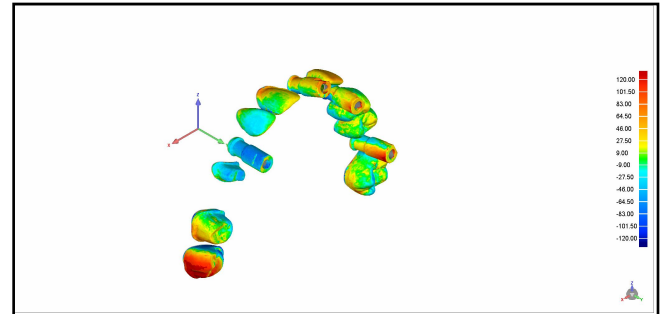

#### Distribución desviación

| >=Min   | <Max    | # Puntos | %     |
|---------|---------|----------|-------|
| -120.00 | -101.50 | 475      | 0.36  |
| -101.50 | -83.00  | 1164     | 0.89  |
| -83.00  | -64.50  | 3246     | 2.49  |
| -64.50  | -46.00  | 5783     | 4.43  |
| -46.00  | -27.50  | 11431    | 8.75  |
| -27.50  | -9.00   | 21069    | 16.13 |
| -9.00   | 9.00    | 27244    | 20.86 |
| 9.00    | 27.50   | 23810    | 18.23 |
| 27.50   | 46.00   | 15396    | 11.79 |
| 46.00   | 64.50   | 8176     | 6.26  |
| 64.50   | 83.00   | 3844     | 2.94  |
| 83.00   | 101.50  | 2454     | 1.88  |
| 101.50  | 120.00  | 1913     | 1.46  |

|                            |      |      |
|----------------------------|------|------|
| Fuera del crítico superior | 3505 | 2.68 |
| Fuera del crítico inferior | 1090 | 0.83 |

Distribución desviación

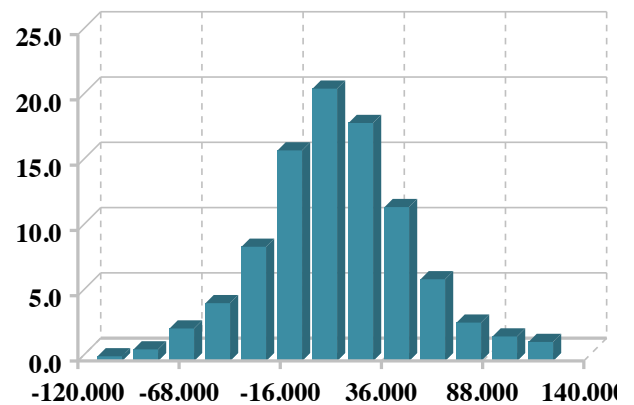

#### Desviaciones estándar

| Distribución (+/-)   | # Puntos | %     |
|----------------------|----------|-------|
| -6 * Desv. estándar. | 98       | 0.08  |
| -5 * Desv. estándar. | 99       | 0.08  |
| -4 * Desv. estándar. | 246      | 0.19  |
| -3 * Desv. estándar. | 634      | 0.49  |
| -2 * Desv. estándar. | 7095     | 5.43  |
| -1 * Desv. estándar. | 63505    | 48.63 |
| 1 * Desv. estándar.  | 49499    | 37.90 |
| 2 * Desv. estándar.  | 7238     | 5.54  |
| 3 * Desv. estándar.  | 1472     | 1.13  |
| 4 * Desv. estándar.  | 208      | 0.16  |
| 5 * Desv. estándar.  | 102      | 0.08  |
| 6 * Desv. estándar.  | 404      | 0.31  |

Desviaciones estándar

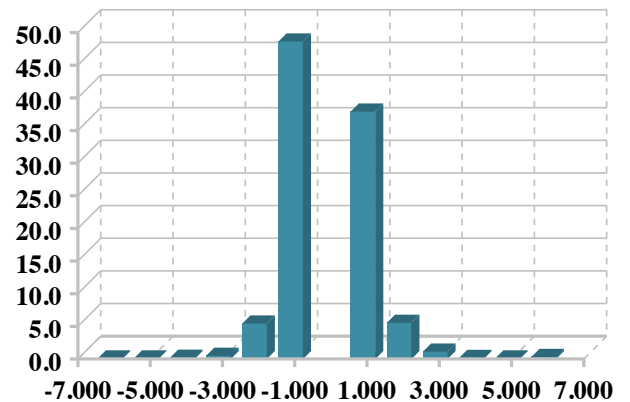

Predefinido: Isométrico

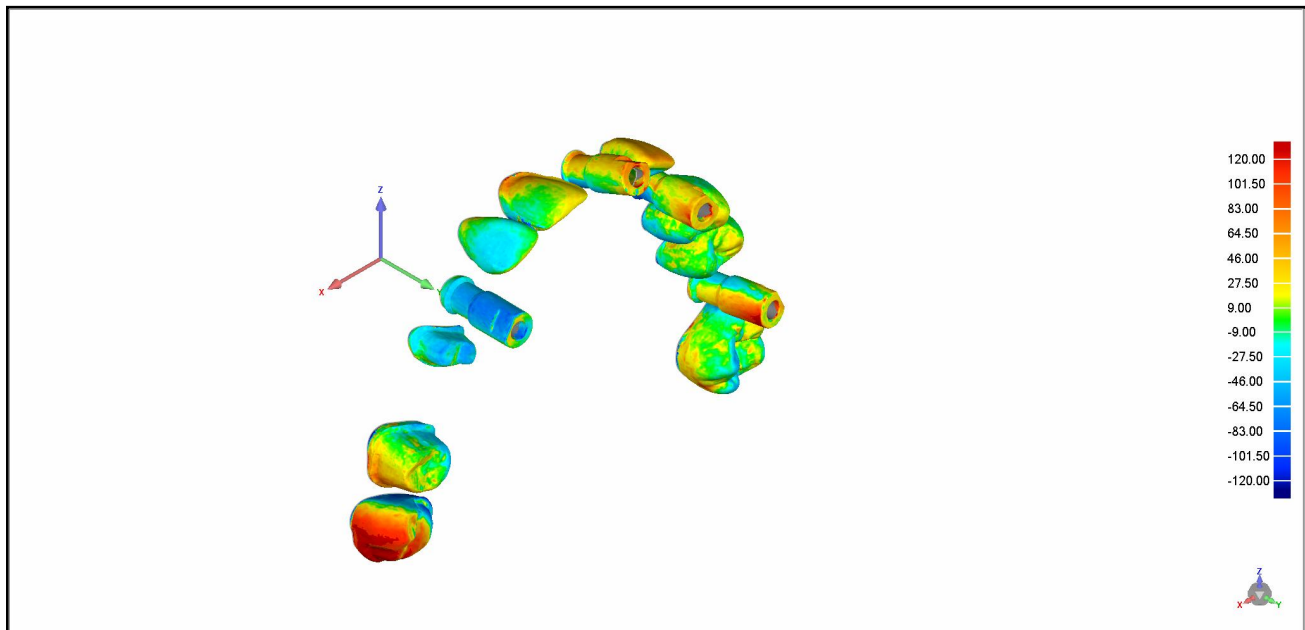

Predefinido: Frente

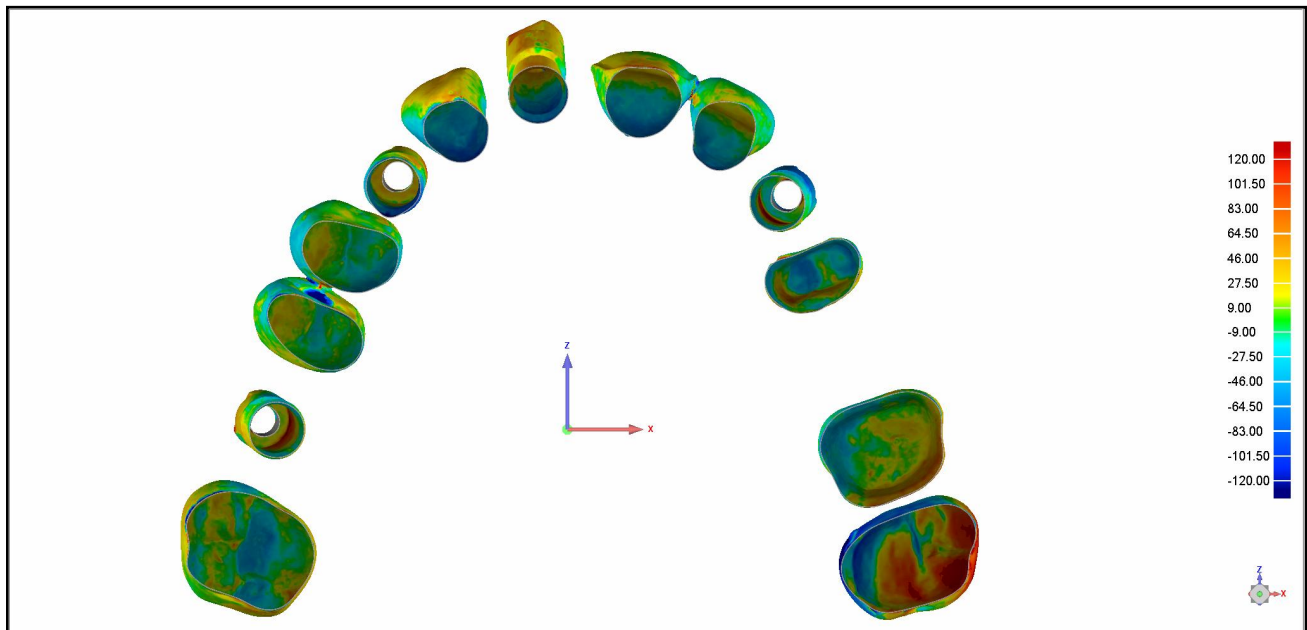

Predefinido: Atrás

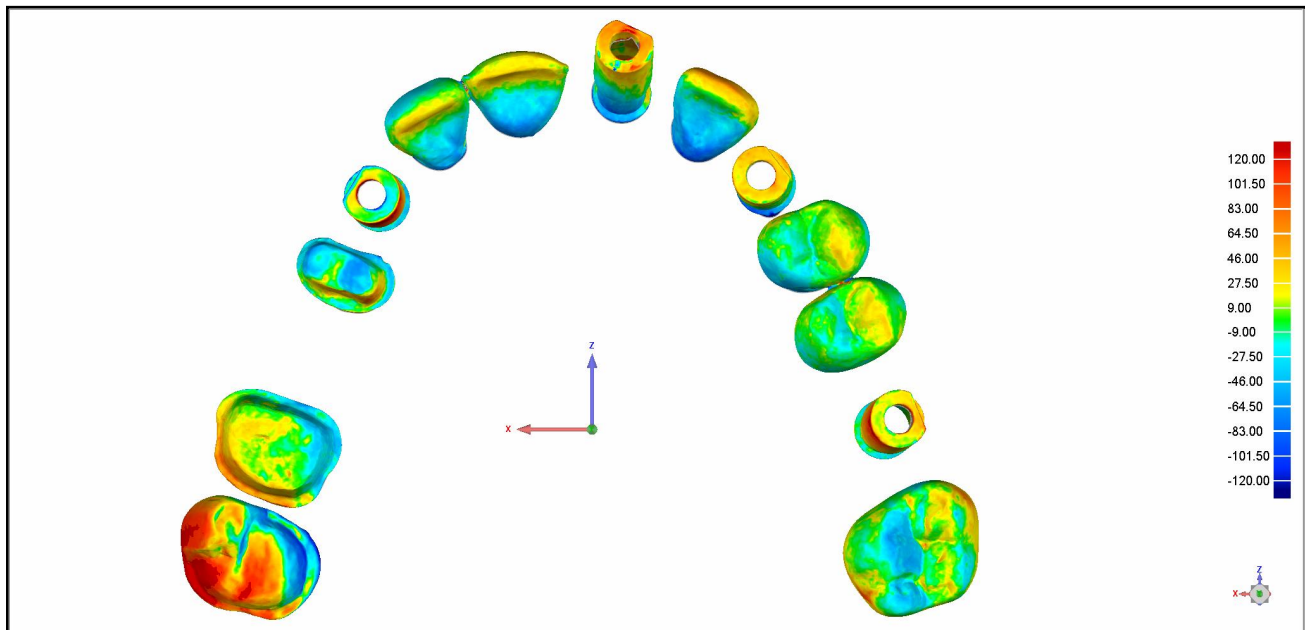

Predefinido: Izquierda

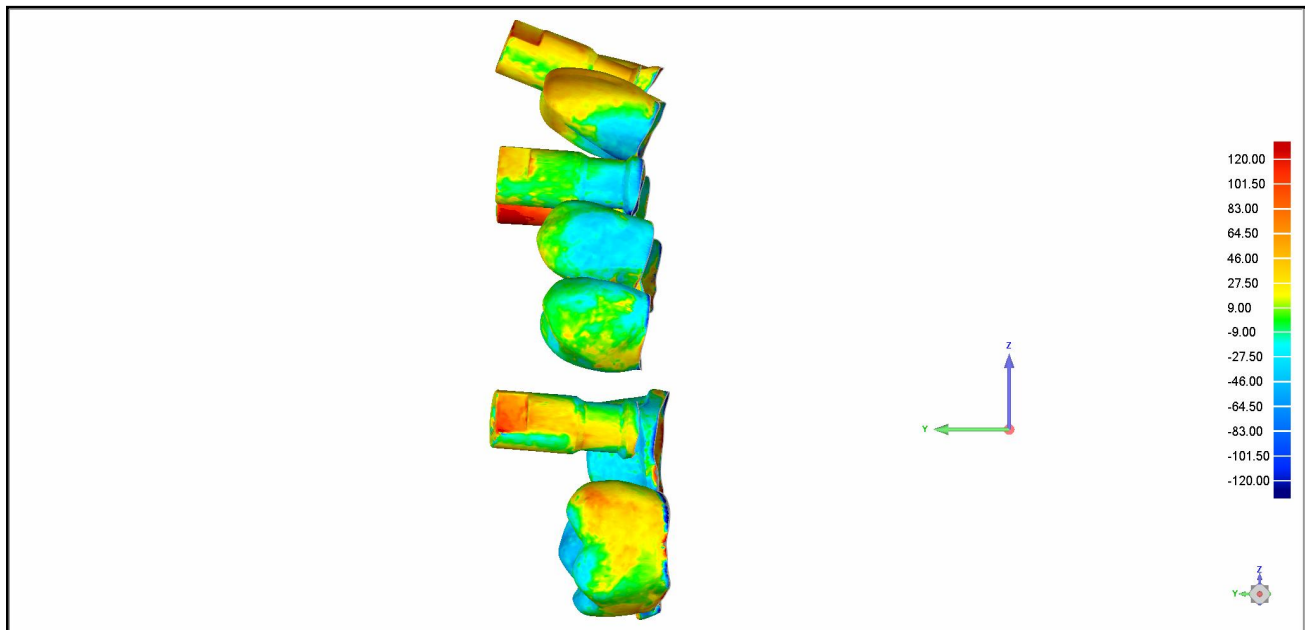

Predefinido: Derecha

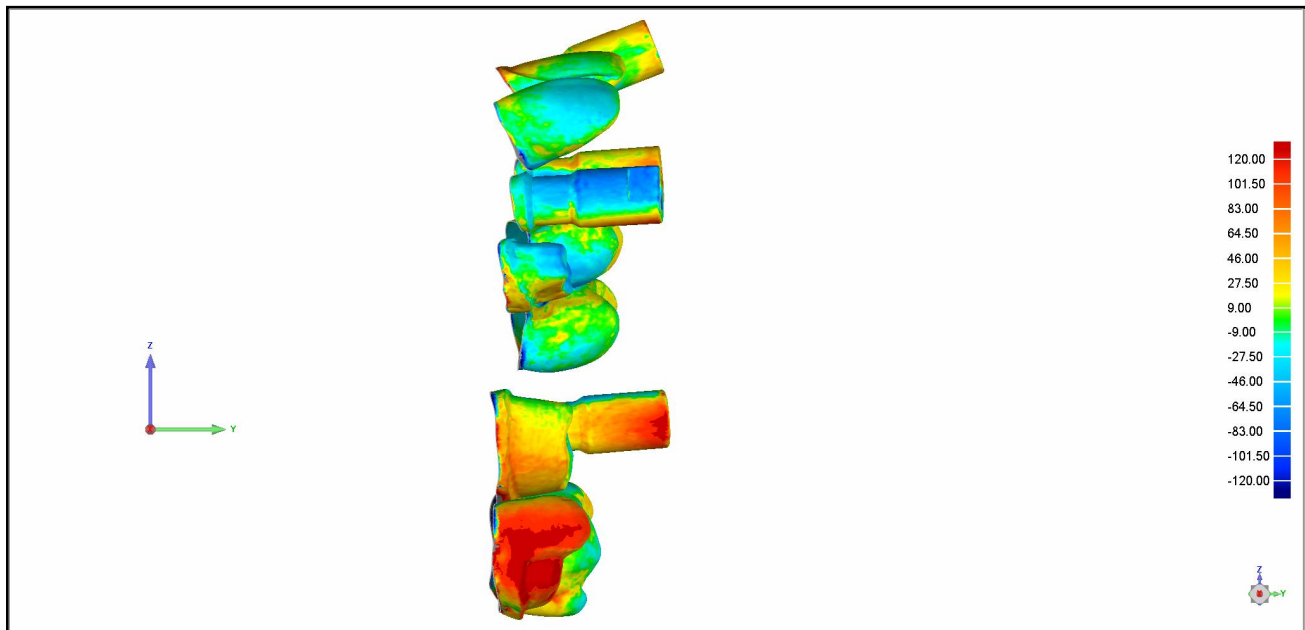

Predefinido: Superior

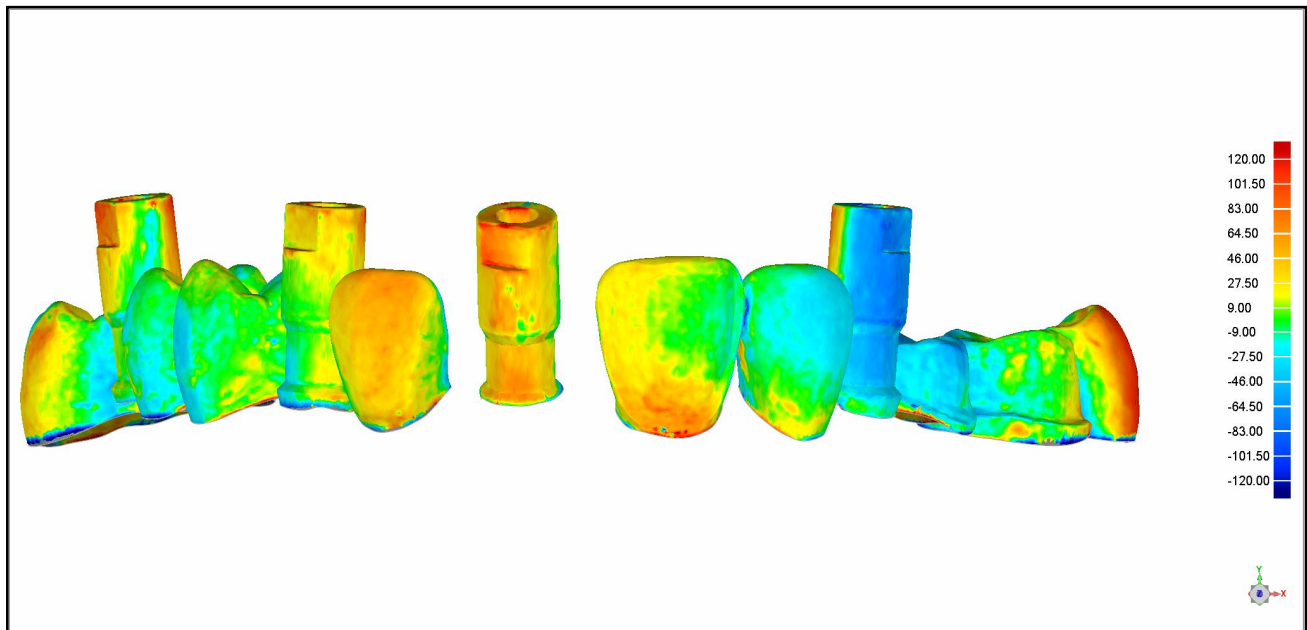

Predefinido: Inferior

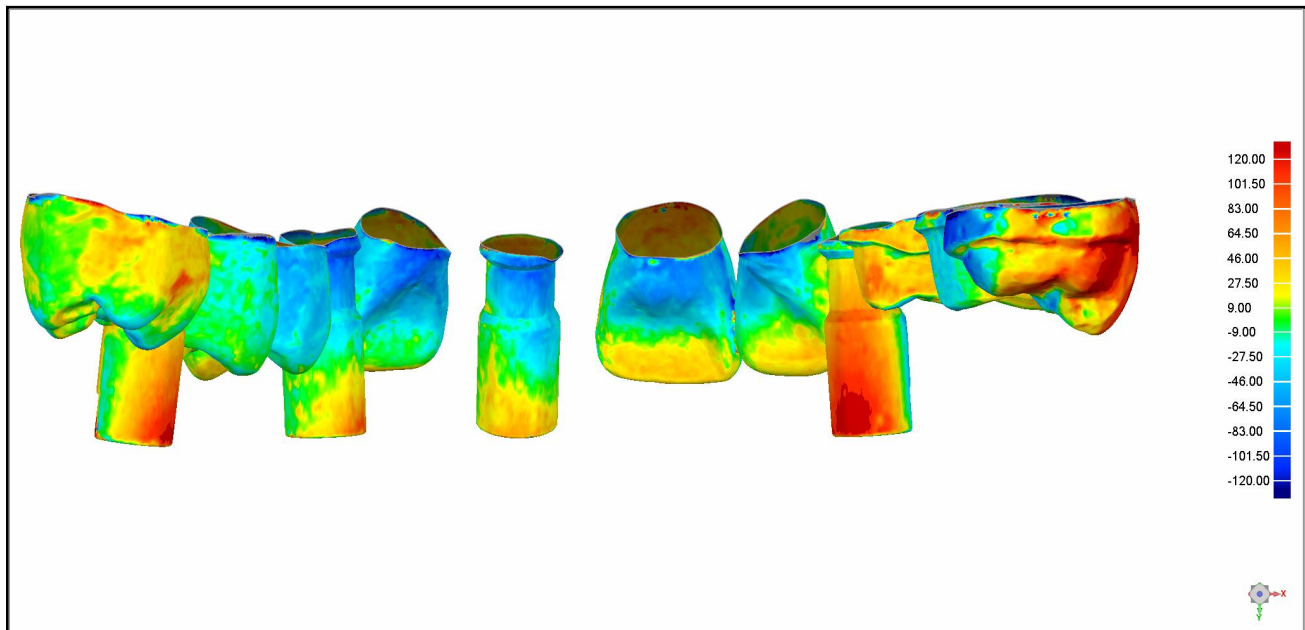



## Ajuste de ubicación: Desviaciones superior e inferior

Unidades: u

| Nombre         | Desv     | Estado | Superior Tol | Inferior Tol | Ref X    | Ref Y    | Ref Z    | Radio | Desv X   | Desv Y   | Desv Z | Medido X | Medido Y | Medido Z | Dir. proy. X | Dir. proy. Y | Dir. proy. Z |
|----------------|----------|--------|--------------|--------------|----------|----------|----------|-------|----------|----------|--------|----------|----------|----------|--------------|--------------|--------------|
| Desv. inferior | -1517.69 |        |              |              | 32064.02 | 27122.94 | -7196.92 | n/a   | -1249.59 | 63.30    | 859.02 | 30814.43 | 27186.23 | -6337.89 | 0.82         | -0.04        | -0.57        |
| Desv. superior | 1717.20  |        |              |              | 16520.24 | 38298.02 | 19351.69 | n/a   | 842.59   | -1494.06 | -81.34 | 17362.83 | 36803.96 | 19270.35 | 0.49         | -0.87        | -0.05        |
