# Supplementary material for: Accuracy of four digital scanners according to scanning strategy in complete-arch impressions
Source: PLOS journal article supplement (doi:10.1371/journal.pone.0202916), 2018-09-13
Supplement: S13 (10.1371/journal.pone.0202916.s013) [file journal.pone.0202916.s013]

### 3D Comparación Resultados

|                       |        |
|-----------------------|--------|
| Modelo referencia     | MRC    |
| Modelo test           | TD4A   |
| Nº de puntos de datos | 128482 |
| # Aislados            | 197    |

|                 |               |
|-----------------|---------------|
| Tipo tolerancia | 3D desviación |
| Unidades        | u             |
| Máx. crítico    | 120.00        |
| Máx. nominal    | 10.00         |
| Mín. nominal    | -10.00        |
| Mín. crítico    | -120.00       |

|                          |               |
|--------------------------|---------------|
| Desviación               |               |
| Desviación superior máx. | 2413.14       |
| Desviación inferior máx. | -2930.92      |
| Desviación media         | 43.93 /-36.33 |
| Desviación estándar      | 89.59         |

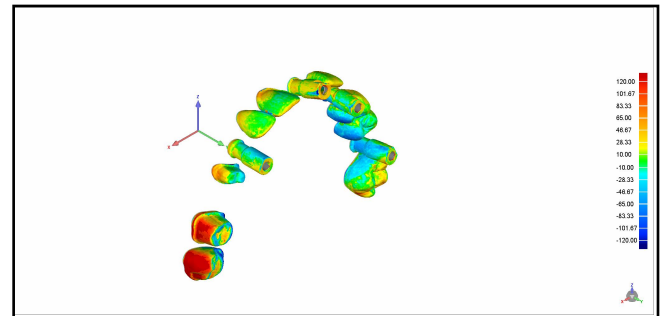

#### Distribución desviación

| >=Min   | <Max    | # Puntos | %     |
|---------|---------|----------|-------|
| -120.00 | -101.67 | 958      | 0.75  |
| -101.67 | -83.33  | 1306     | 1.02  |
| -83.33  | -65.00  | 3213     | 2.50  |
| -65.00  | -46.67  | 5443     | 4.24  |
| -46.67  | -28.33  | 8987     | 6.99  |
| -28.33  | -10.00  | 15995    | 12.45 |
| -10.00  | 10.00   | 30848    | 24.01 |
| 10.00   | 28.33   | 27243    | 21.20 |
| 28.33   | 46.67   | 14169    | 11.03 |
| 46.67   | 65.00   | 5887     | 4.58  |
| 65.00   | 83.33   | 2578     | 2.01  |
| 83.33   | 101.67  | 1884     | 1.47  |
| 101.67  | 120.00  | 1910     | 1.49  |

|                            |      |      |
|----------------------------|------|------|
| Fuera del crítico superior | 5177 | 4.03 |
| Fuera del crítico inferior | 2884 | 2.24 |

Distribución desviación

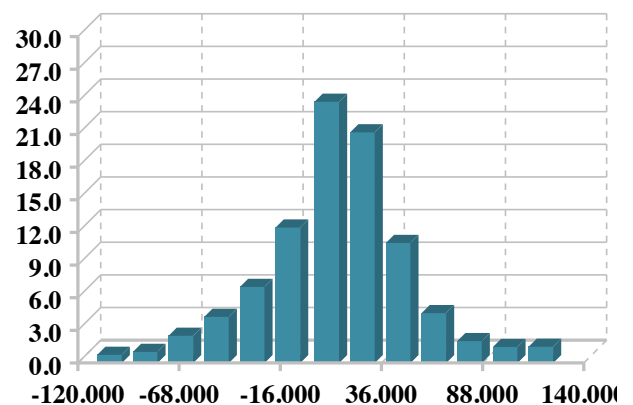

#### Desviaciones estándar

| Distribución (+/-)   | # Puntos | %     |
|----------------------|----------|-------|
| -6 * Desv. estándar. | 70       | 0.05  |
| -5 * Desv. estándar. | 40       | 0.03  |
| -4 * Desv. estándar. | 74       | 0.06  |
| -3 * Desv. estándar. | 313      | 0.24  |
| -2 * Desv. estándar. | 5190     | 4.04  |
| -1 * Desv. estándar. | 65153    | 50.71 |
| 1 * Desv. estándar.  | 50396    | 39.22 |
| 2 * Desv. estándar.  | 5810     | 4.52  |
| 3 * Desv. estándar.  | 643      | 0.50  |
| 4 * Desv. estándar.  | 164      | 0.13  |
| 5 * Desv. estándar.  | 104      | 0.08  |
| 6 * Desv. estándar.  | 525      | 0.41  |

Desviaciones estándar

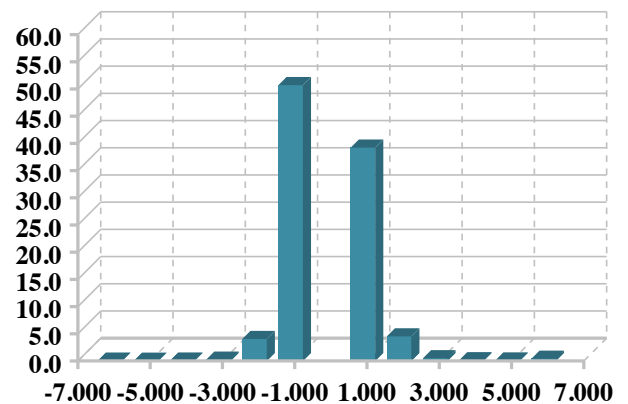

Predefinido: Isométrico

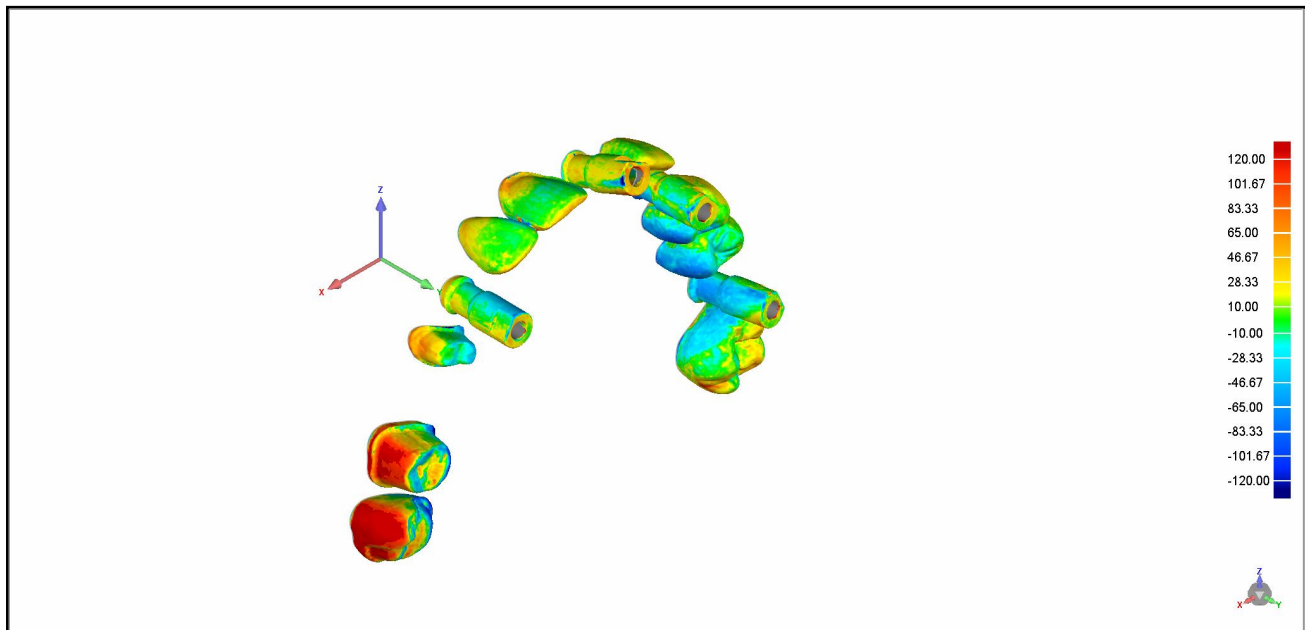

Predefinido: Frente

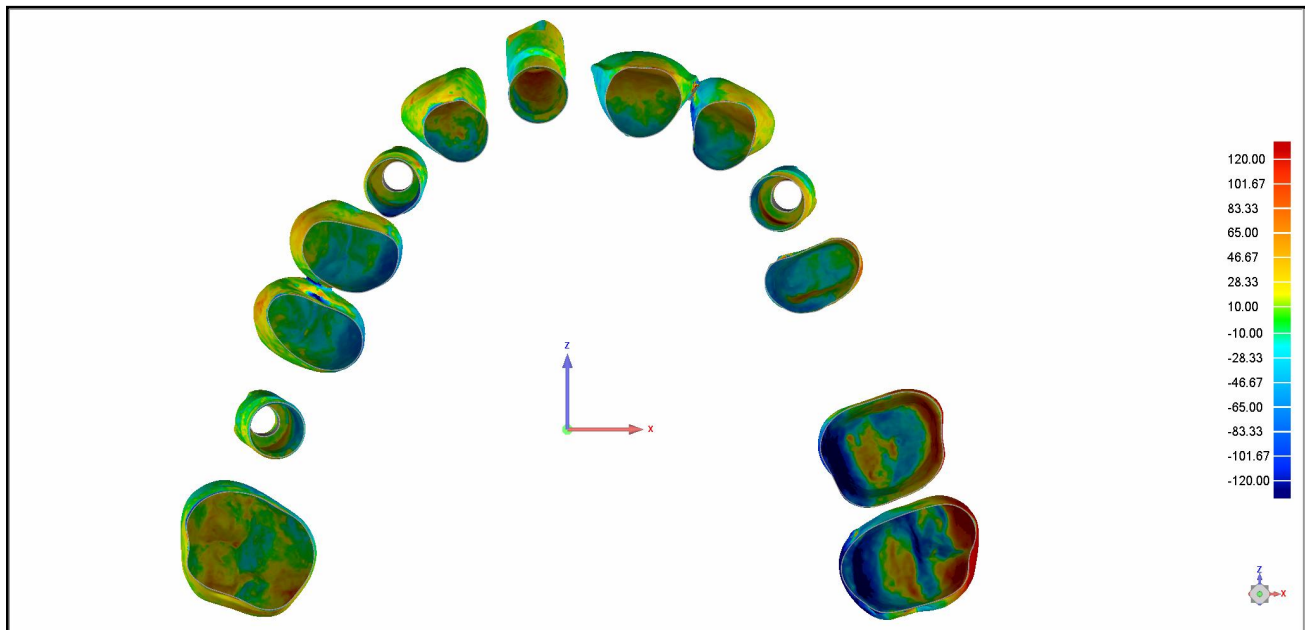

Predefinido: Atrás

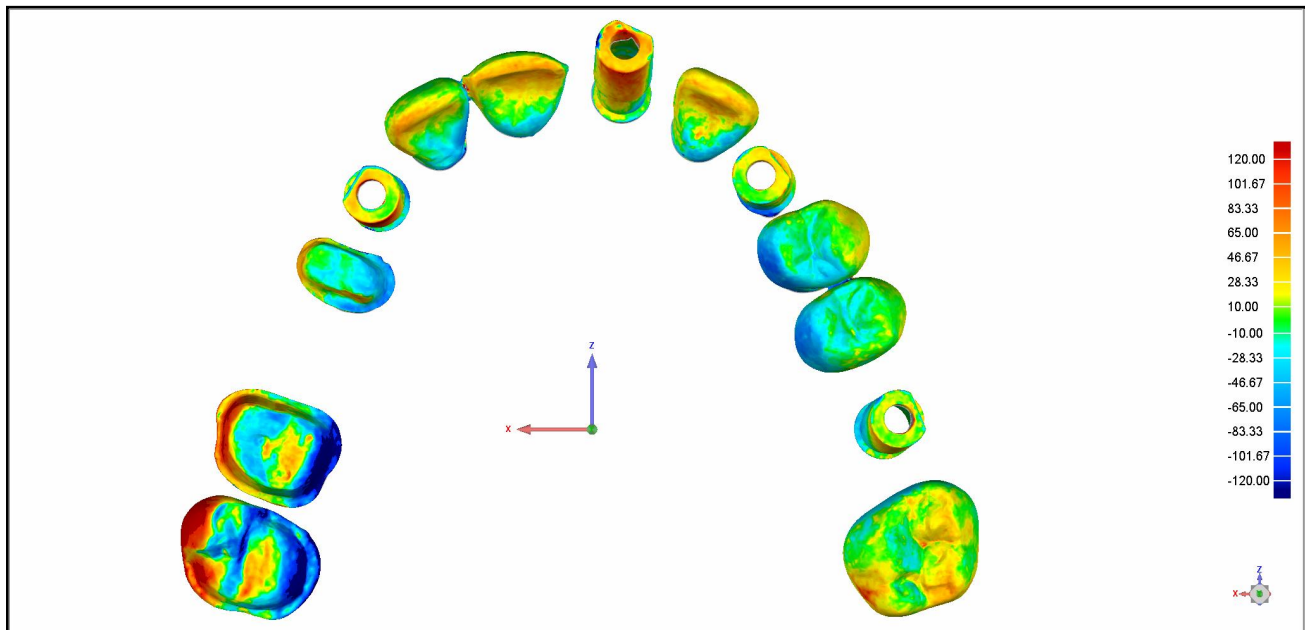

Predefinido: Izquierda

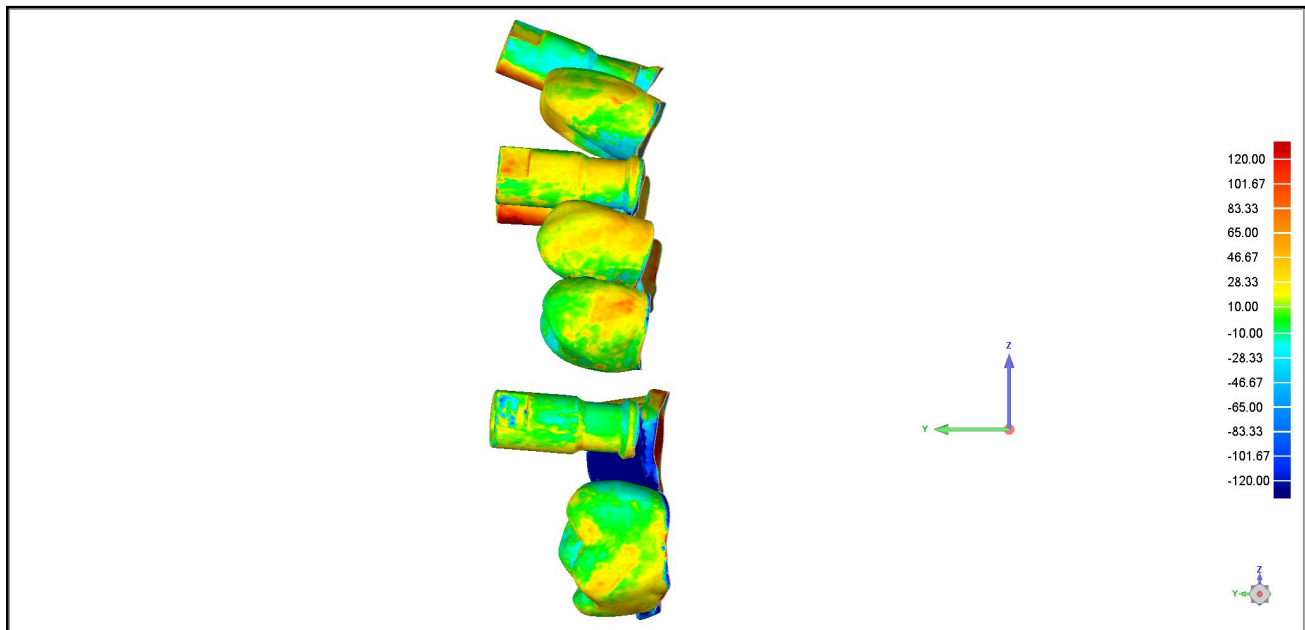

Predefinido: Derecha

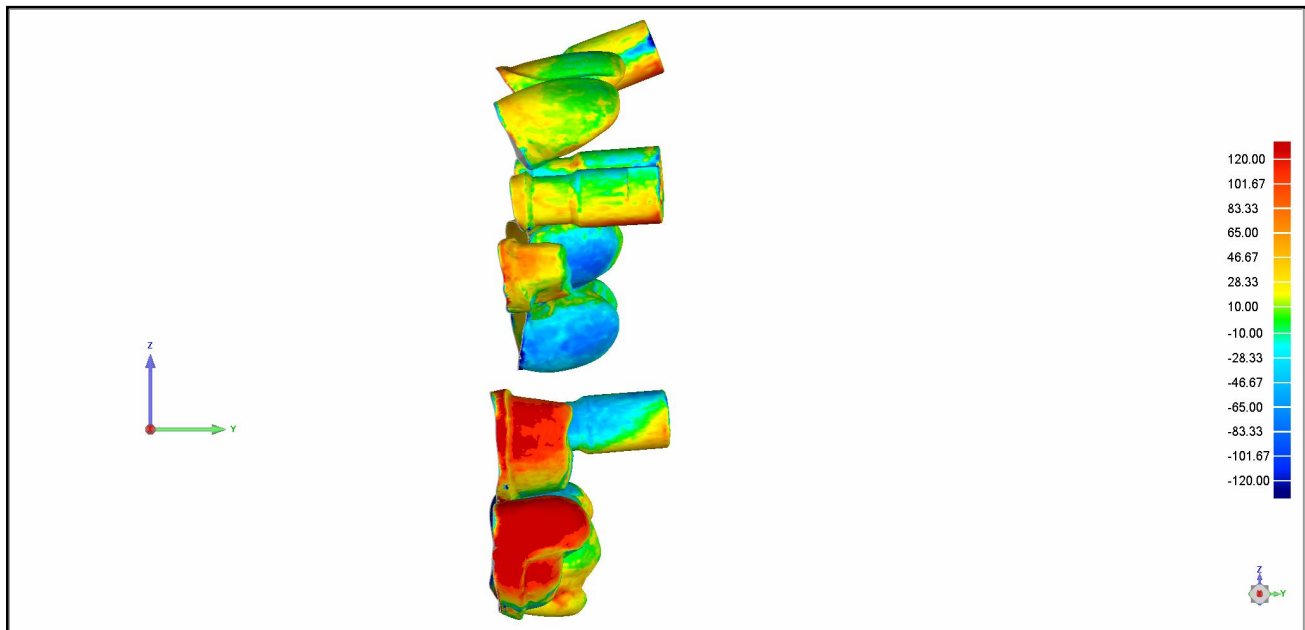

Predefinido: Superior

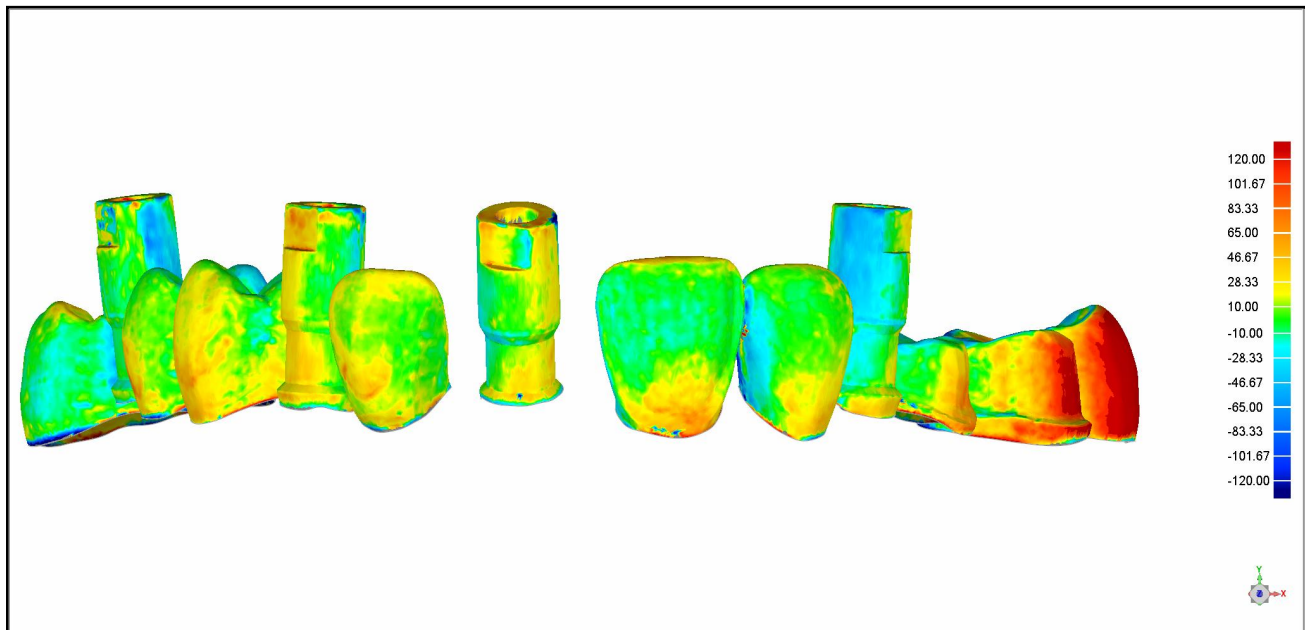

Predefinido: Inferior

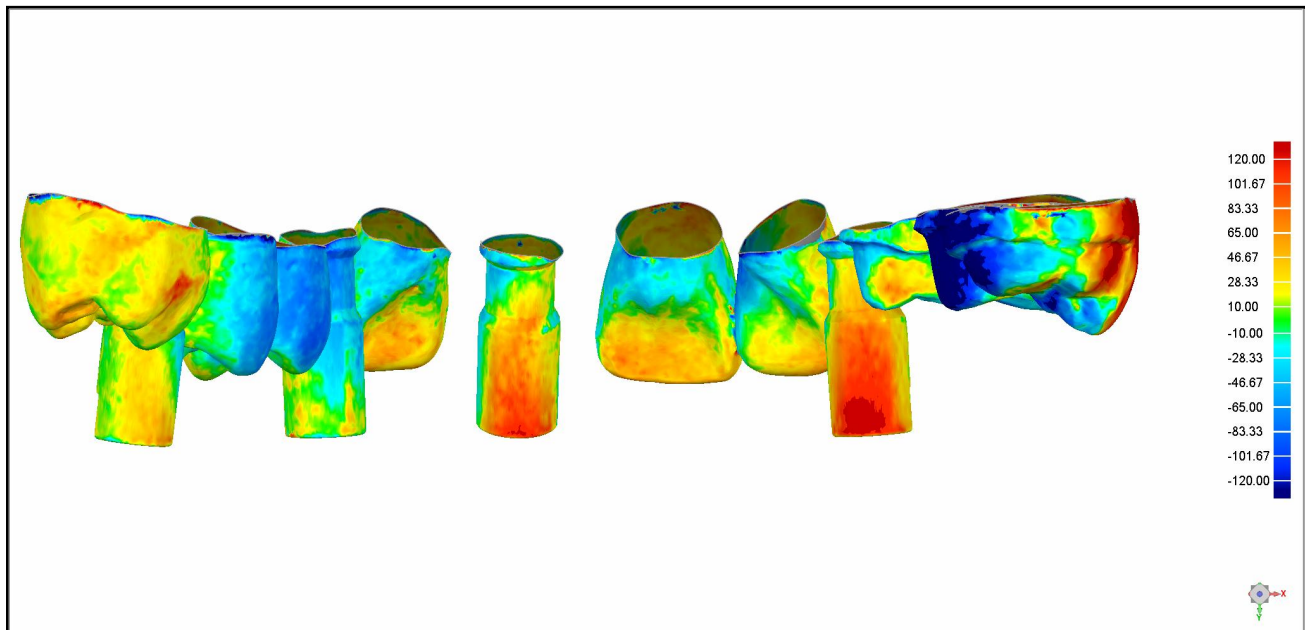



Ajuste de ubicación: Desviaciones superior e inferior

Unidades: u

| Nombre         | Desv     | Estado | Superior Tol | Inferior Tol | Ref X     | Ref Y    | Ref Z    | Radio | Desv X   | Desv Y  | Desv Z  | Medido X  | Medido Y | Medido Z | Dir. proy. X | Dir. proy. Y | Dir. proy. Z |
|----------------|----------|--------|--------------|--------------|-----------|----------|----------|-------|----------|---------|---------|-----------|----------|----------|--------------|--------------|--------------|
| Desv. inferior | -2930.92 |        |              |              | -13203.90 | 38507.15 | 18811.31 | n/a   | -2203.44 | 1903.44 | 334.78  | -15407.33 | 40410.59 | 19146.09 | 0.75         | -0.65        | -0.11        |
| Desv. superior | 2413.14  |        |              |              | 25410.11  | 27462.45 | -5764.99 | n/a   | 2288.76  | 31.04   | -764.09 | 27698.87  | 27493.50 | -6529.08 | 0.95         | 0.01         | -0.32        |
