# Supplementary material for: Accuracy of four digital scanners according to scanning strategy in complete-arch impressions
Source: PLOS journal article supplement (doi:10.1371/journal.pone.0202916), 2018-09-13
Supplement: S13 (10.1371/journal.pone.0202916.s013) [file journal.pone.0202916.s013]

### 3D Comparación Resultados

|                       |        |
|-----------------------|--------|
| Modelo referencia     | MRC    |
| Modelo test           | TD5A   |
| Nº de puntos de datos | 129491 |
| # Aislados            | 447    |

|                 |               |
|-----------------|---------------|
| Tipo tolerancia | 3D desviación |
| Unidades        | u             |
| Máx. crítico    | 120.00        |
| Máx. nominal    | 31.00         |
| Mín. nominal    | -31.00        |
| Mín. crítico    | -120.00       |

|                          |                  |
|--------------------------|------------------|
| Desviación               |                  |
| Desviación superior máx. | 2976.55          |
| Desviación inferior máx. | -3096.48         |
| Desviación media         | 126.77 / -106.47 |
| Desviación estándar      | 209.94           |

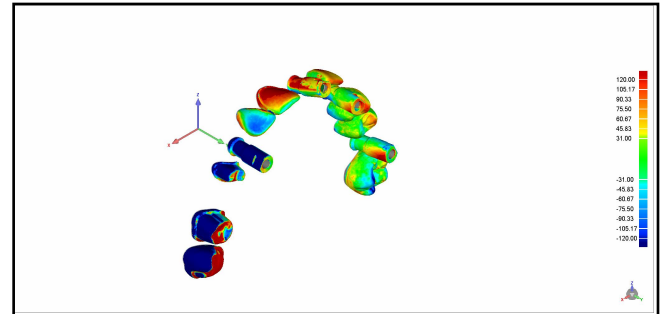

#### Distribución desviación

| >=Min   | <Max    | # Puntos | %     |
|---------|---------|----------|-------|
| -120.00 | -105.17 | 1347     | 1.04  |
| -105.17 | -90.33  | 2218     | 1.71  |
| -90.33  | -75.50  | 2853     | 2.20  |
| -75.50  | -60.67  | 3541     | 2.73  |
| -60.67  | -45.83  | 4205     | 3.25  |
| -45.83  | -31.00  | 5894     | 4.55  |
| -31.00  | 31.00   | 43826    | 33.84 |
| 31.00   | 45.83   | 8345     | 6.44  |
| 45.83   | 60.67   | 7138     | 5.51  |
| 60.67   | 75.50   | 5448     | 4.21  |
| 75.50   | 90.33   | 4268     | 3.30  |
| 90.33   | 105.17  | 3503     | 2.71  |
| 105.17  | 120.00  | 2697     | 2.08  |

|                            |       |       |
|----------------------------|-------|-------|
| Fuera del crítico superior | 22259 | 17.19 |
| Fuera del crítico inferior | 11949 | 9.23  |

Distribución desviación

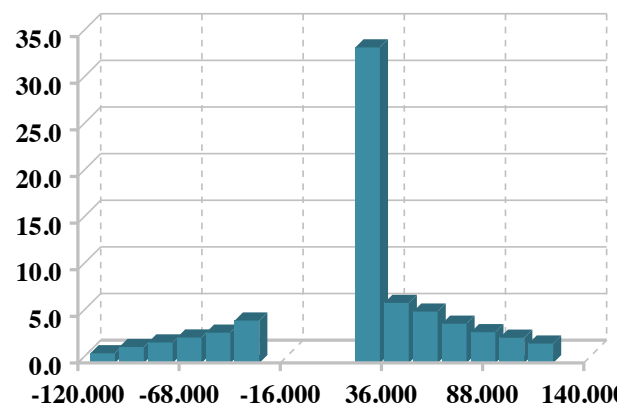

#### Desviaciones estándar

| Distribución (+/-)   | # Puntos | %     |
|----------------------|----------|-------|
| -6 * Desv. estándar. | 140      | 0.11  |
| -5 * Desv. estándar. | 64       | 0.05  |
| -4 * Desv. estándar. | 1141     | 0.88  |
| -3 * Desv. estándar. | 2382     | 1.84  |
| -2 * Desv. estándar. | 5322     | 4.11  |
| -1 * Desv. estándar. | 67159    | 51.86 |
| 1 * Desv. estándar.  | 41984    | 32.42 |
| 2 * Desv. estándar.  | 5753     | 4.44  |
| 3 * Desv. estándar.  | 3713     | 2.87  |
| 4 * Desv. estándar.  | 1517     | 1.17  |
| 5 * Desv. estándar.  | 143      | 0.11  |
| 6 * Desv. estándar.  | 173      | 0.13  |

Desviaciones estándar

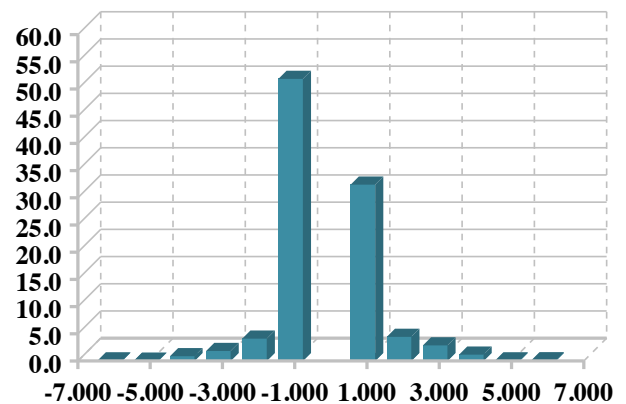

Predefinido: Isométrico

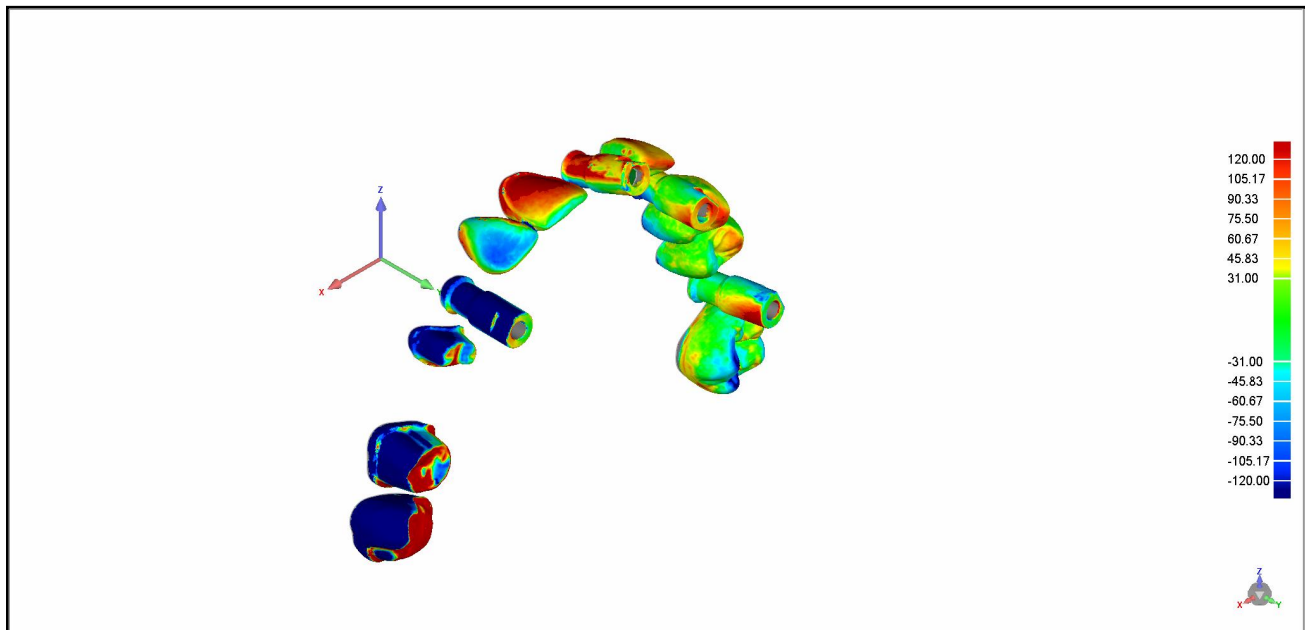

Predefinido: Frente

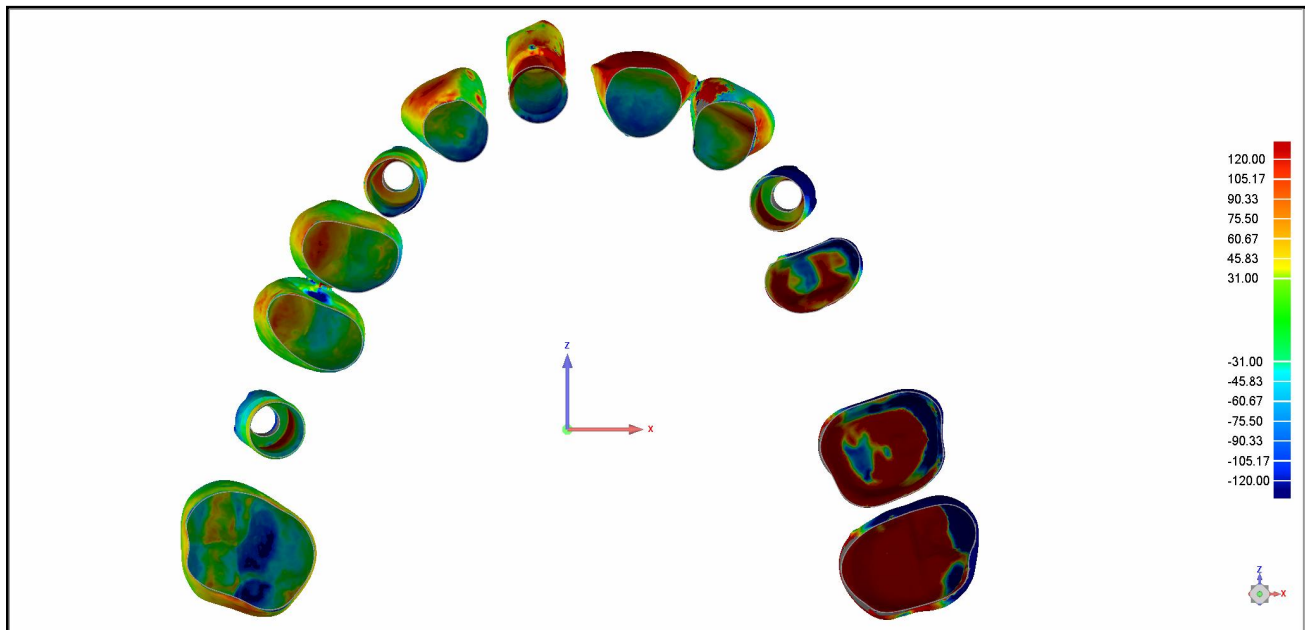

Predefinido: Atrás

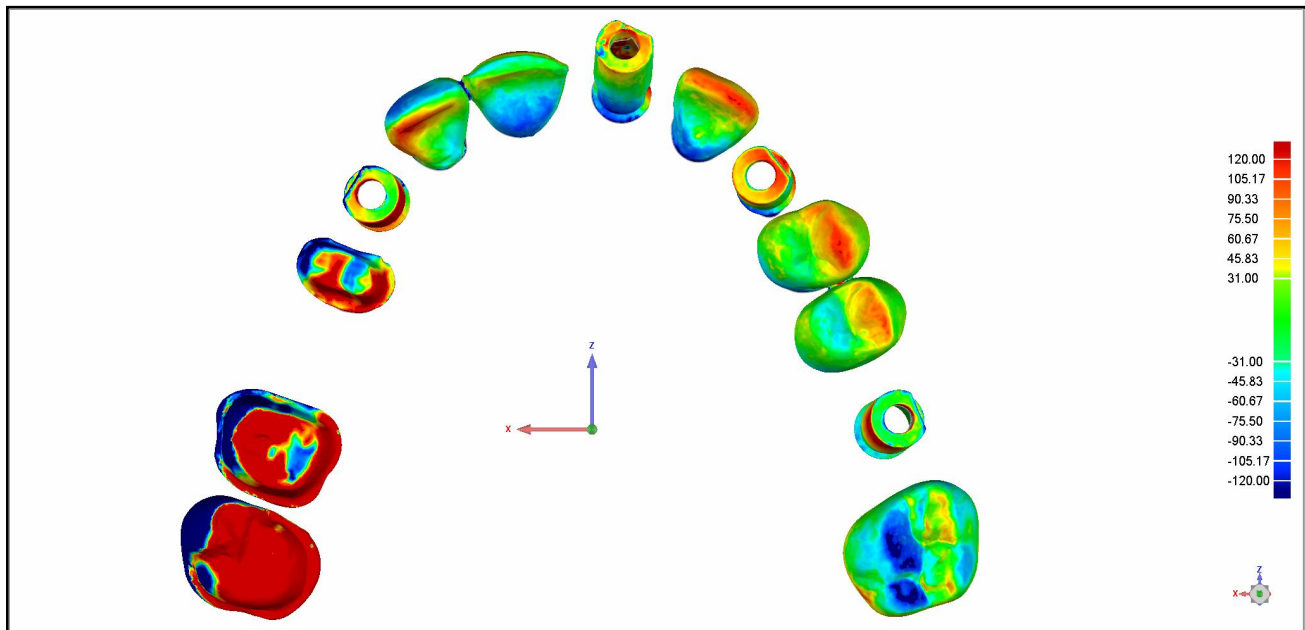

Predefinido: Izquierda

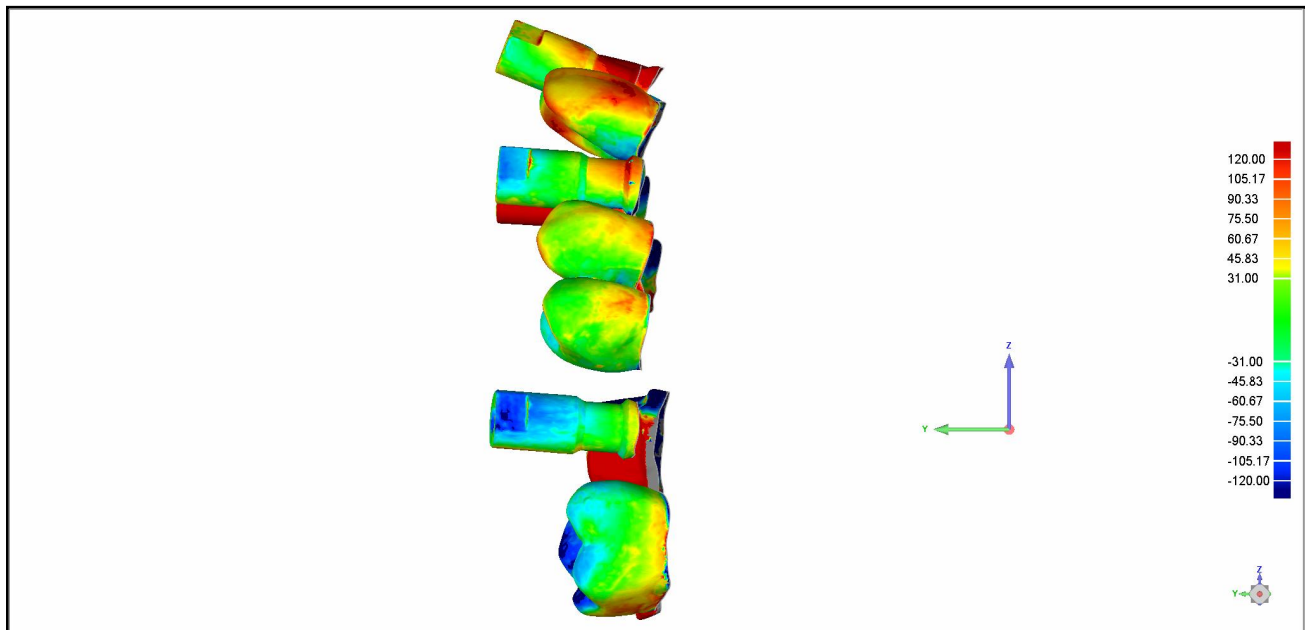

Predefinido: Derecha

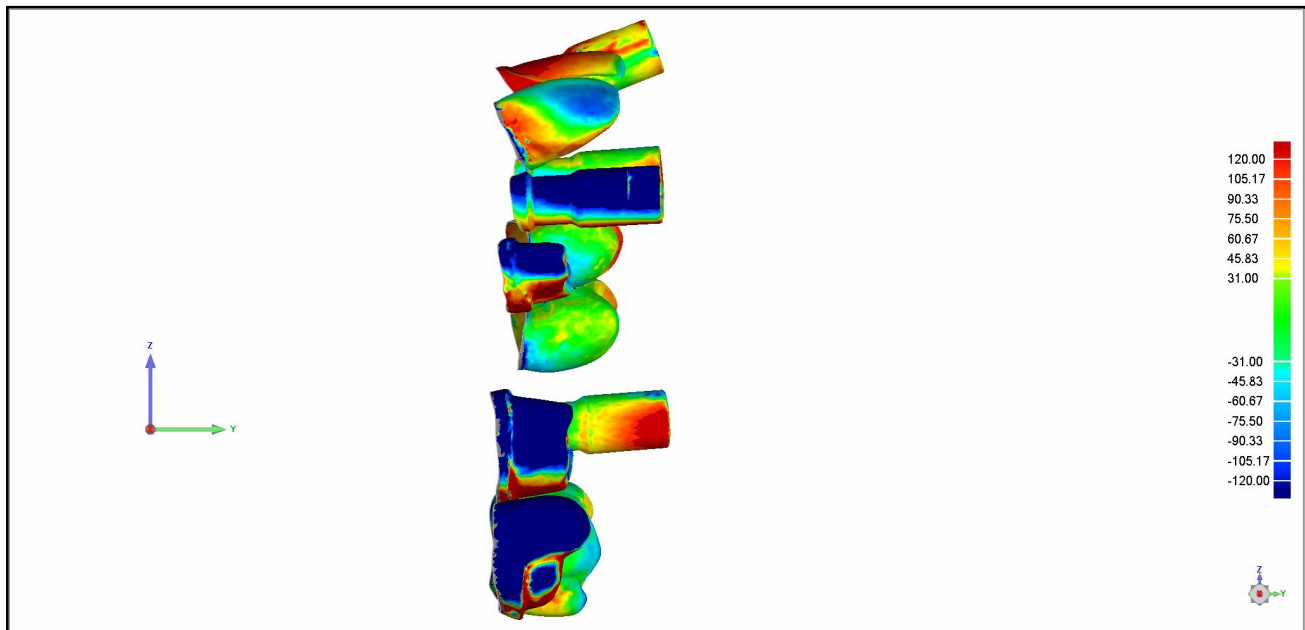

Predefinido: Superior

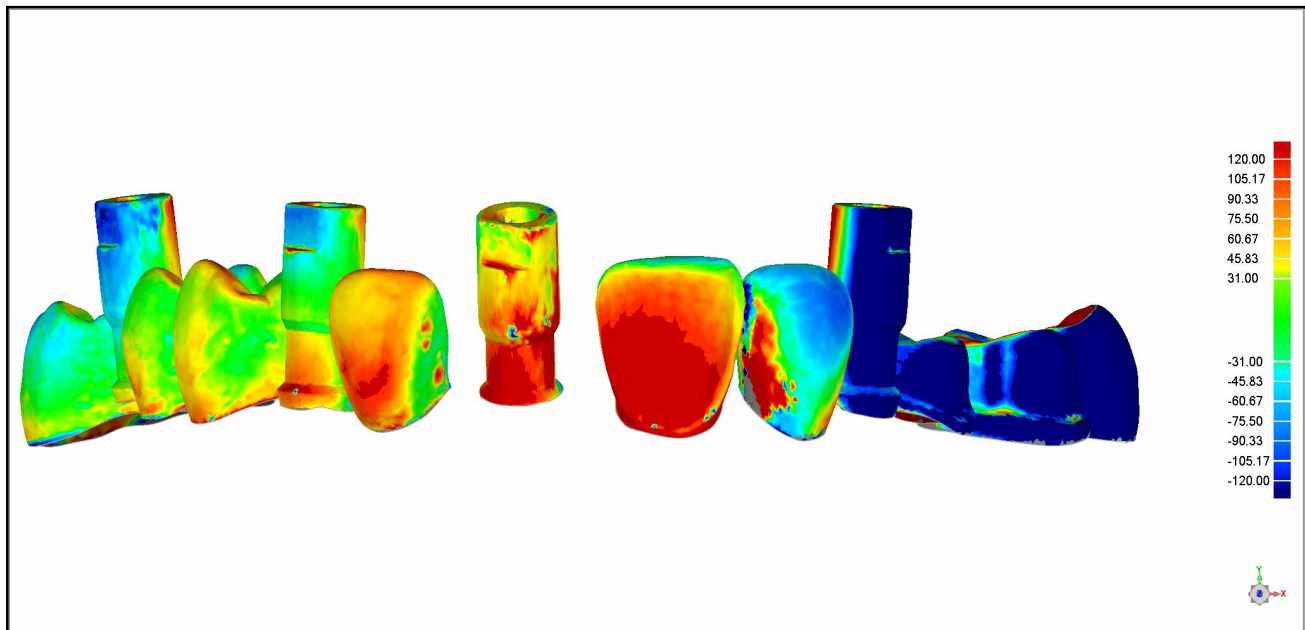

Predefinido: Inferior

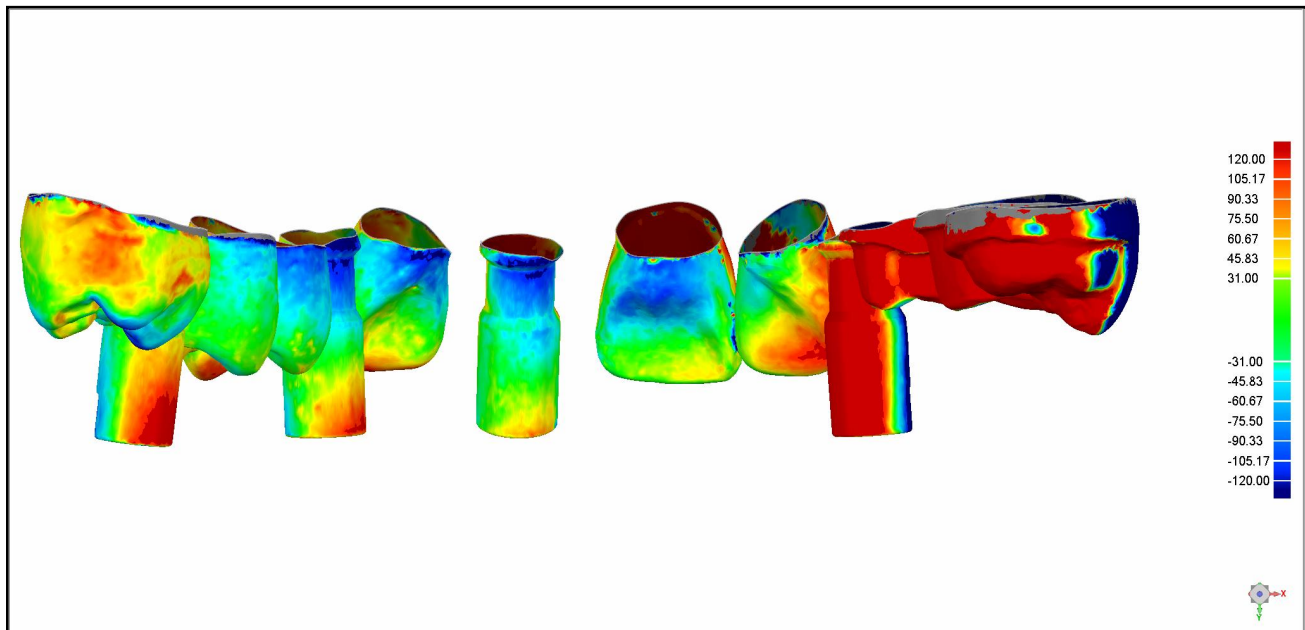



# Ajuste de ubicación: Desviaciones superior e inferior

Unidades: u

| Nombre         | Desv     | Estado | Superior Tol | Inferior Tol | Ref X    | Ref Y    | Ref Z    | Radio | Desv X  | Desv Y | Desv Z   | Medido X | Medido Y | Medido Z  | Dir. proy. X | Dir. proy. Y | Dir. proy. Z |
|----------------|----------|--------|--------------|--------------|----------|----------|----------|-------|---------|--------|----------|----------|----------|-----------|--------------|--------------|--------------|
| Desv. inferior | -3096.48 |        |              |              | 32061.00 | 27268.70 | -9389.57 | n/a   | -867.70 | 282.17 | -2959.00 | 31193.30 | 27550.87 | -12348.57 | 0.28         | -0.09        | 0.96         |
| Desv. superior | 2976.55  |        |              |              | 25410.11 | 27462.45 | -5764.99 | n/a   | 2916.56 | 130.17 | -580.12  | 28326.67 | 27592.62 | -6345.12  | 0.98         | 0.04         | -0.19        |
