# Supplementary material for: Accuracy of four digital scanners according to scanning strategy in complete-arch impressions
Source: PLOS journal article supplement (doi:10.1371/journal.pone.0202916), 2018-09-13
Supplement: S13 (10.1371/journal.pone.0202916.s013) [file journal.pone.0202916.s013]

### 3D Comparación Resultados

|                       |        |
|-----------------------|--------|
| Modelo referencia     | MRC    |
| Modelo test           | TD7A   |
| Nº de puntos de datos | 130011 |
| # Aislados            | 324    |

|                 |               |
|-----------------|---------------|
| Tipo tolerancia | 3D desviación |
| Unidades        | u             |
| Máx. crítico    | 120.00        |
| Máx. nominal    | 28.00         |
| Mín. nominal    | -28.00        |
| Mín. crítico    | -120.00       |

|                          |                |
|--------------------------|----------------|
| Desviación               |                |
| Desviación superior máx. | 2137.69        |
| Desviación inferior máx. | -3087.47       |
| Desviación media         | 93.53 / -85.24 |
| Desviación estándar      | 145.95         |

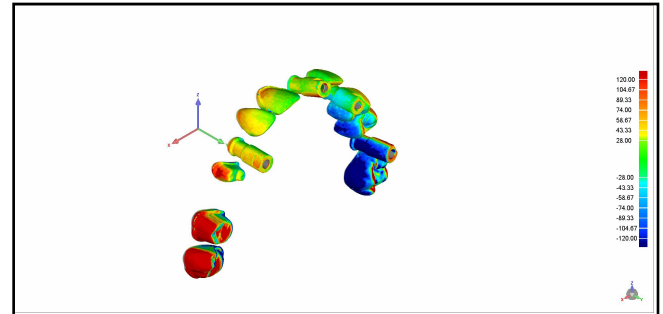

### Distribución desviación

| >=Min   | <Max    | # Puntos | %     |
|---------|---------|----------|-------|
| -120.00 | -104.67 | 1919     | 1.48  |
| -104.67 | -89.33  | 2668     | 2.05  |
| -89.33  | -74.00  | 3467     | 2.67  |
| -74.00  | -58.67  | 3730     | 2.87  |
| -58.67  | -43.33  | 4532     | 3.49  |
| -43.33  | -28.00  | 5772     | 4.44  |
| -28.00  | 28.00   | 37162    | 28.58 |
| 28.00   | 43.33   | 12450    | 9.58  |
| 43.33   | 58.67   | 10524    | 8.09  |
| 58.67   | 74.00   | 7601     | 5.85  |
| 74.00   | 89.33   | 4549     | 3.50  |
| 89.33   | 104.67  | 2923     | 2.25  |
| 104.67  | 120.00  | 2584     | 1.99  |

|                            |       |       |
|----------------------------|-------|-------|
| Fuera del crítico superior | 19057 | 14.66 |
| Fuera del crítico inferior | 11073 | 8.52  |

Distribución desviación

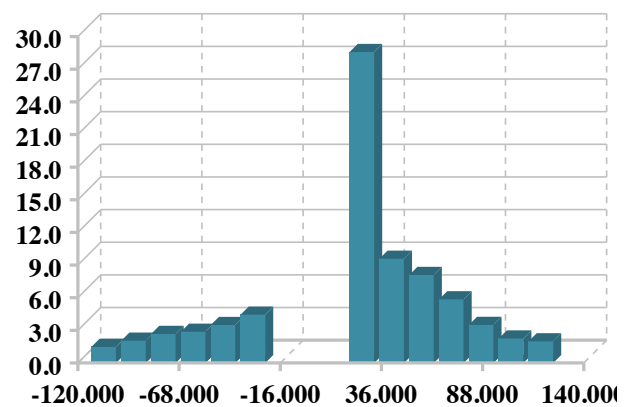

### Desviaciones estándar

| Distribución (+/-)   | # Puntos | %     |
|----------------------|----------|-------|
| -6 * Desv. estándar. | 117      | 0.09  |
| -5 * Desv. estándar. | 52       | 0.04  |
| -4 * Desv. estándar. | 309      | 0.24  |
| -3 * Desv. estándar. | 1897     | 1.46  |
| -2 * Desv. estándar. | 9009     | 6.93  |
| -1 * Desv. estándar. | 59665    | 45.89 |
| 1 * Desv. estándar.  | 45746    | 35.19 |
| 2 * Desv. estándar.  | 9925     | 7.63  |
| 3 * Desv. estándar.  | 2635     | 2.03  |
| 4 * Desv. estándar.  | 157      | 0.12  |
| 5 * Desv. estándar.  | 86       | 0.07  |
| 6 * Desv. estándar.  | 413      | 0.32  |

Desviaciones estándar

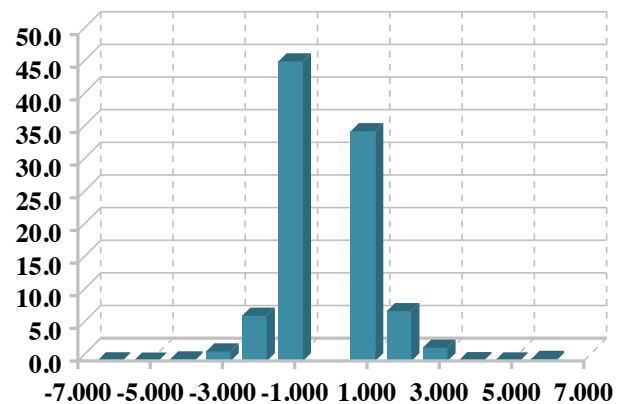

Predefinido: Isométrico

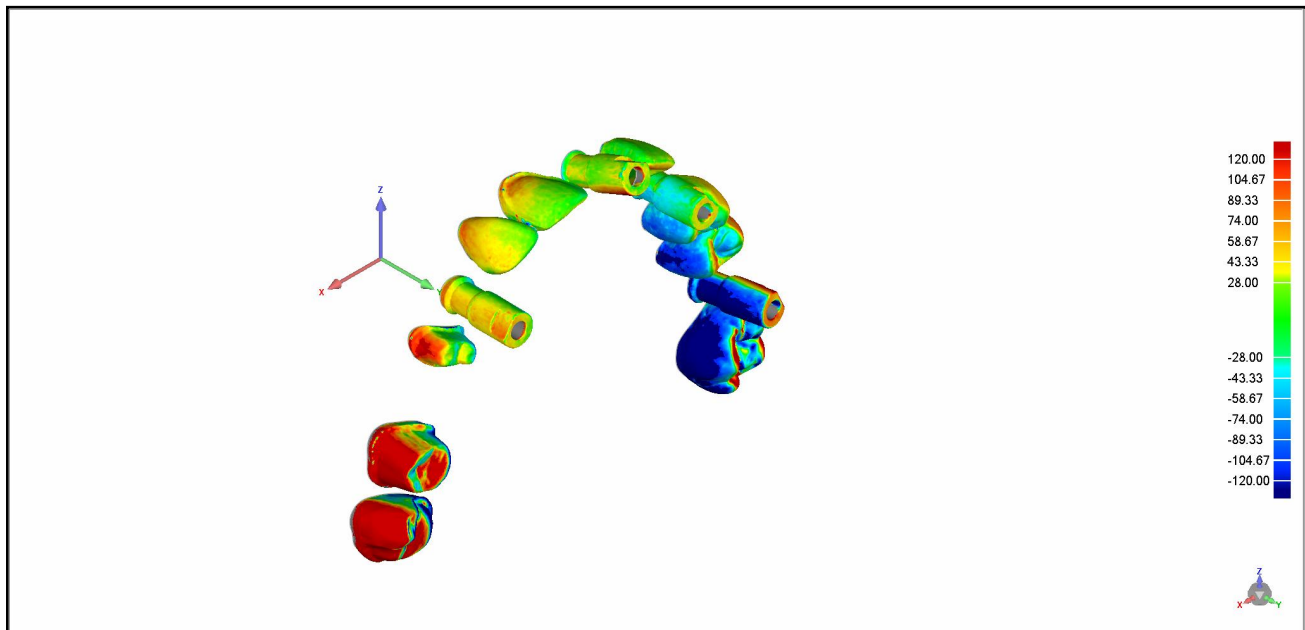

Predefinido: Frente

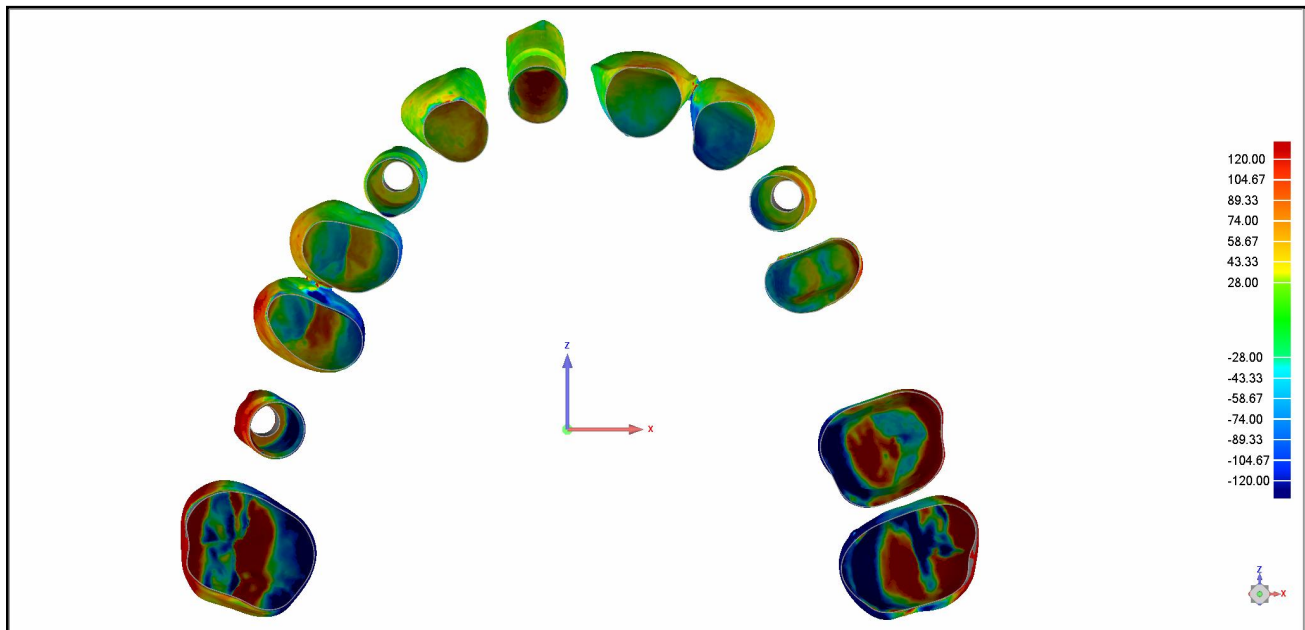

Predefinido: Atrás

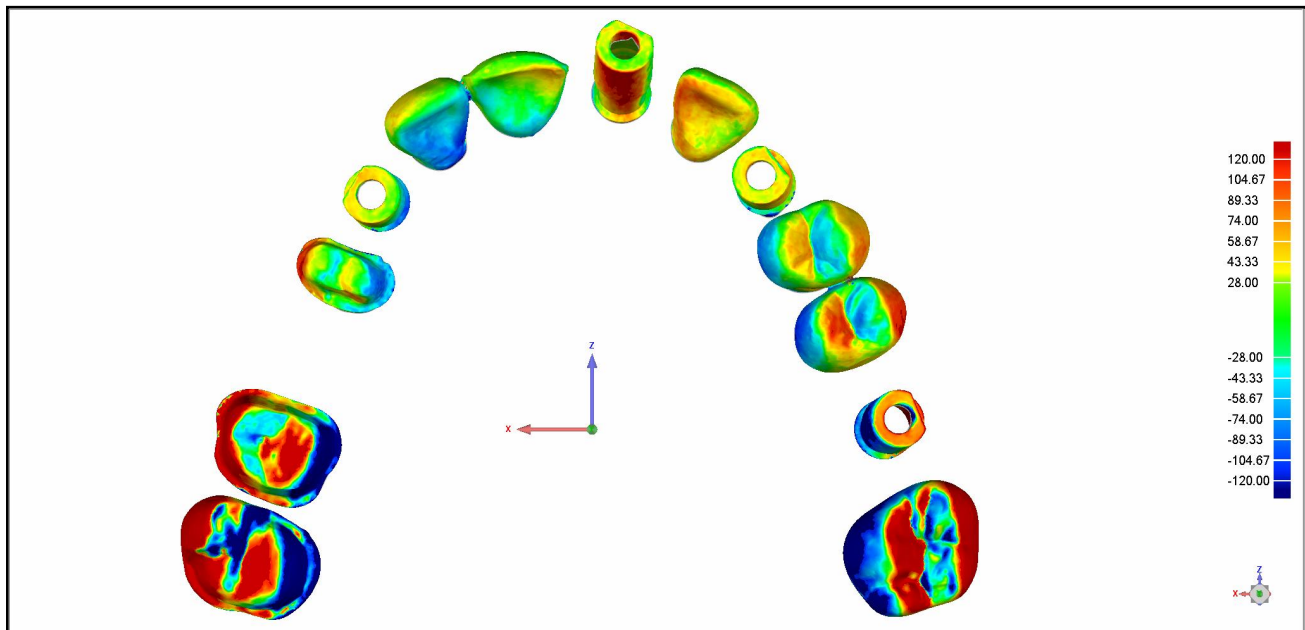

Predefinido: Izquierda

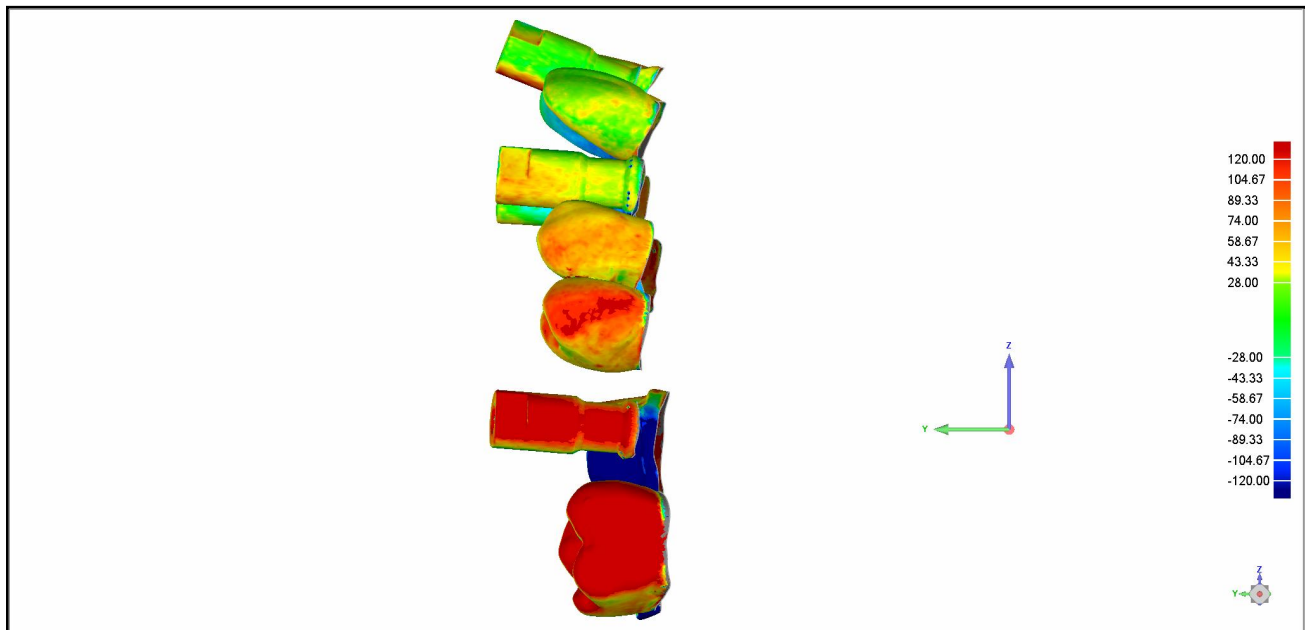

Predefinido: Derecha

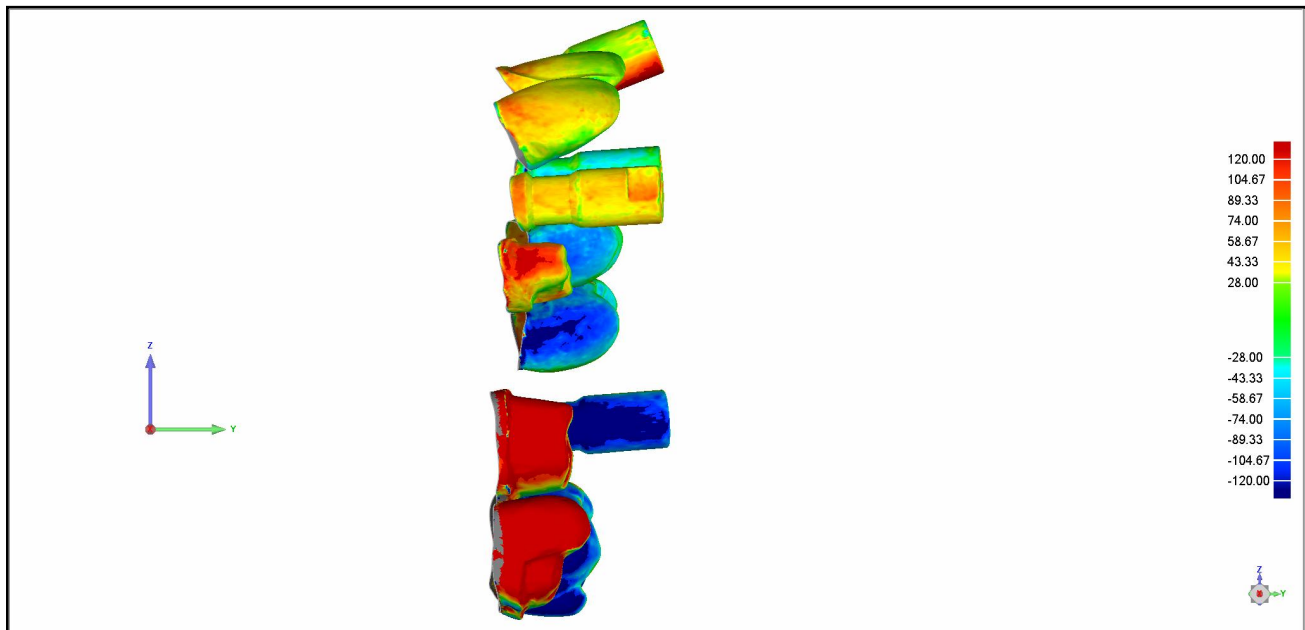

Predefinido: Superior

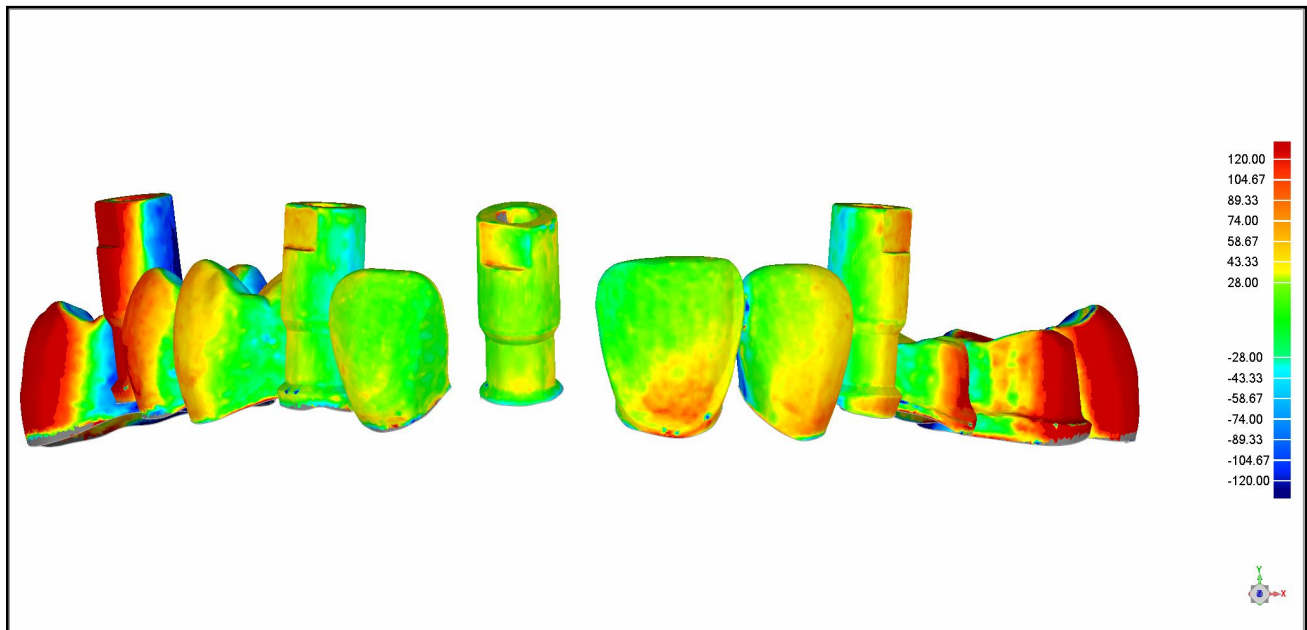

Predefinido: Inferior

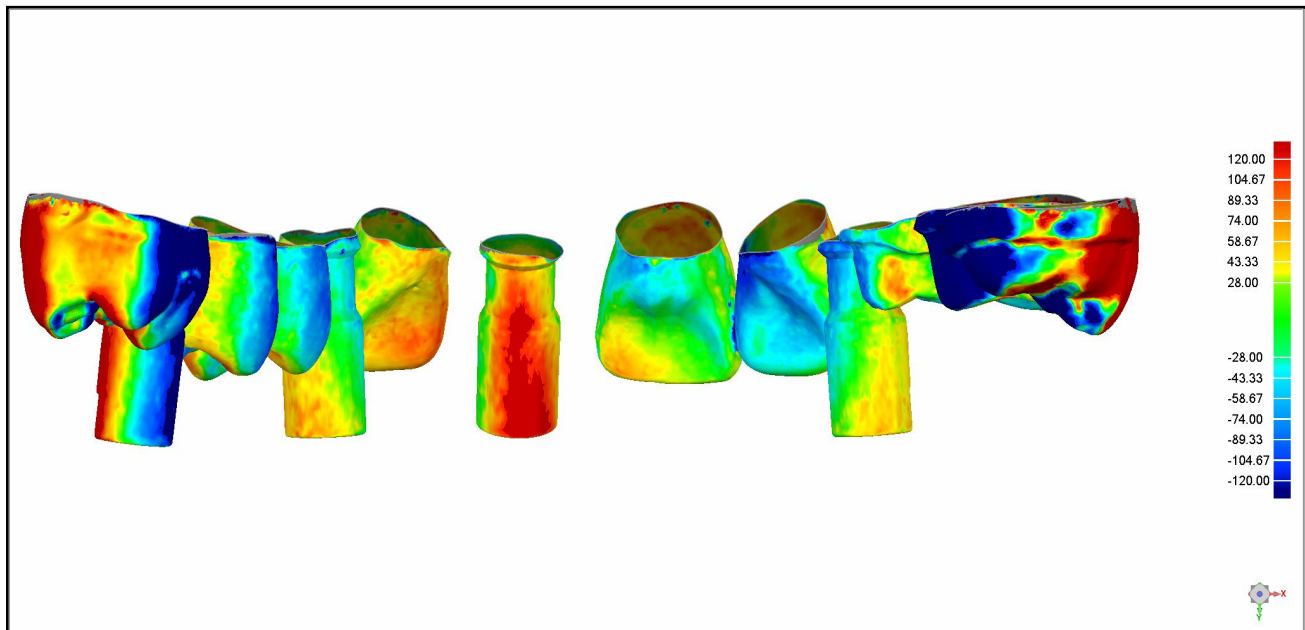



## Ajuste de ubicación: Desviaciones superior e inferior

Unidades: u

| Nombre         | Desv     | Estado | Superior Tol | Inferior Tol | Ref X    | Ref Y    | Ref Z    | Radio | Desv X  | Desv Y   | Desv Z   | Medido X | Medido Y | Medido Z  | Dir. proy. X | Dir. proy. Y | Dir. proy. Z |
|----------------|----------|--------|--------------|--------------|----------|----------|----------|-------|---------|----------|----------|----------|----------|-----------|--------------|--------------|--------------|
| Desv. inferior | -3087.47 |        |              |              | 32061.00 | 27268.70 | -9389.57 | n/a   | -556.97 | 310.39   | -3020.91 | 31504.03 | 27579.10 | -12410.47 | 0.18         | -0.10        | 0.98         |
| Desv. superior | 2137.69  |        |              |              | 16660.54 | 38373.51 | 19471.23 | n/a   | 651.89  | -2029.59 | -159.84  | 17312.42 | 36343.93 | 19311.39  | 0.30         | -0.95        | -0.07        |
