# Supplementary material for: Accuracy of four digital scanners according to scanning strategy in complete-arch impressions
Source: PLOS journal article supplement (doi:10.1371/journal.pone.0202916), 2018-09-13
Supplement: S13 (10.1371/journal.pone.0202916.s013) [file journal.pone.0202916.s013]

### 3D Comparación Resultados

|                       |        |
|-----------------------|--------|
| Modelo referencia     | MRC    |
| Modelo test           | TD8A   |
| Nº de puntos de datos | 129317 |
| # Aislados            | 399    |

|                 |               |
|-----------------|---------------|
| Tipo tolerancia | 3D desviación |
| Unidades        | u             |
| Máx. crítico    | 120.00        |
| Máx. nominal    | 5.00          |
| Mín. nominal    | -5.00         |
| Mín. crítico    | -120.00       |

|                          |               |
|--------------------------|---------------|
| Desviación               |               |
| Desviación superior máx. | 2503.71       |
| Desviación inferior máx. | -2268.21      |
| Desviación media         | 39.82 /-32.82 |
| Desviación estándar      | 73.49         |

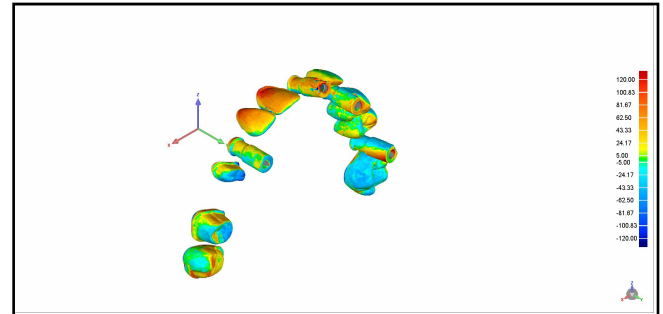

#### Distribución desviación

| >=Min   | <Max    | # Puntos | %     |
|---------|---------|----------|-------|
| -120.00 | -100.83 | 1053     | 0.81  |
| -100.83 | -81.67  | 1679     | 1.30  |
| -81.67  | -62.50  | 2512     | 1.94  |
| -62.50  | -43.33  | 6738     | 5.21  |
| -43.33  | -24.17  | 17260    | 13.35 |
| -24.17  | -5.00   | 23895    | 18.48 |
| -5.00   | 5.00    | 13019    | 10.07 |
| 5.00    | 24.17   | 22747    | 17.59 |
| 24.17   | 43.33   | 17324    | 13.40 |
| 43.33   | 62.50   | 11900    | 9.20  |
| 62.50   | 81.67   | 5298     | 4.10  |
| 81.67   | 100.83  | 2155     | 1.67  |
| 100.83  | 120.00  | 941      | 0.73  |

|                            |      |      |
|----------------------------|------|------|
| Fuera del crítico superior | 1582 | 1.22 |
| Fuera del crítico inferior | 1214 | 0.94 |

Distribución desviación

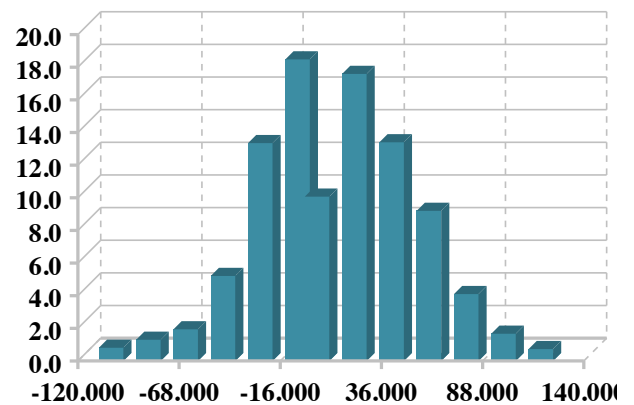

#### Desviaciones estándar

| Distribución (+/-)   | # Puntos | %     |
|----------------------|----------|-------|
| -6 * Desv. estándar. | 130      | 0.10  |
| -5 * Desv. estándar. | 77       | 0.06  |
| -4 * Desv. estándar. | 160      | 0.12  |
| -3 * Desv. estándar. | 401      | 0.31  |
| -2 * Desv. estándar. | 4859     | 3.76  |
| -1 * Desv. estándar. | 62306    | 48.18 |
| 1 * Desv. estándar.  | 56264    | 43.51 |
| 2 * Desv. estándar.  | 4102     | 3.17  |
| 3 * Desv. estándar.  | 397      | 0.31  |
| 4 * Desv. estándar.  | 213      | 0.16  |
| 5 * Desv. estándar.  | 102      | 0.08  |
| 6 * Desv. estándar.  | 306      | 0.24  |

Desviaciones estándar

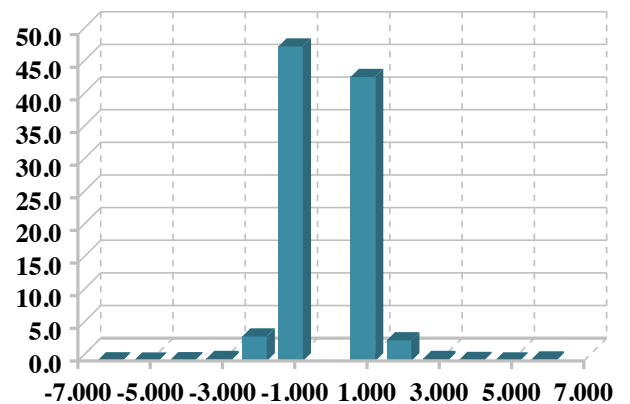

Predefinido: Isométrico

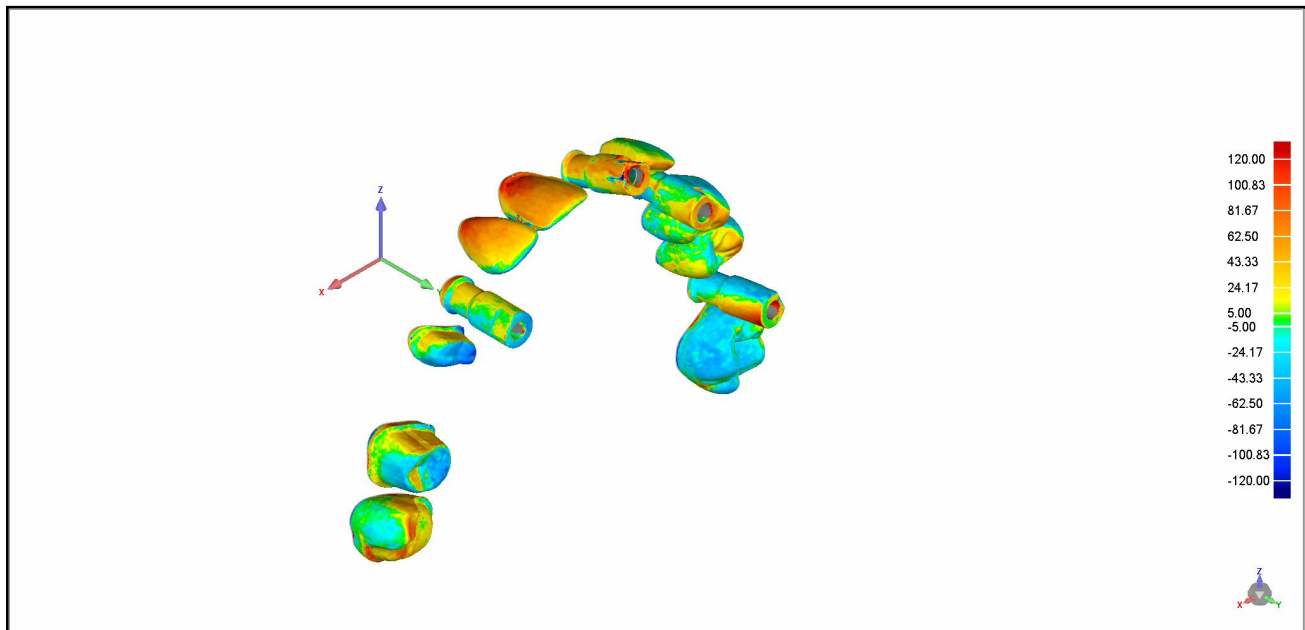

Predefinido: Frente

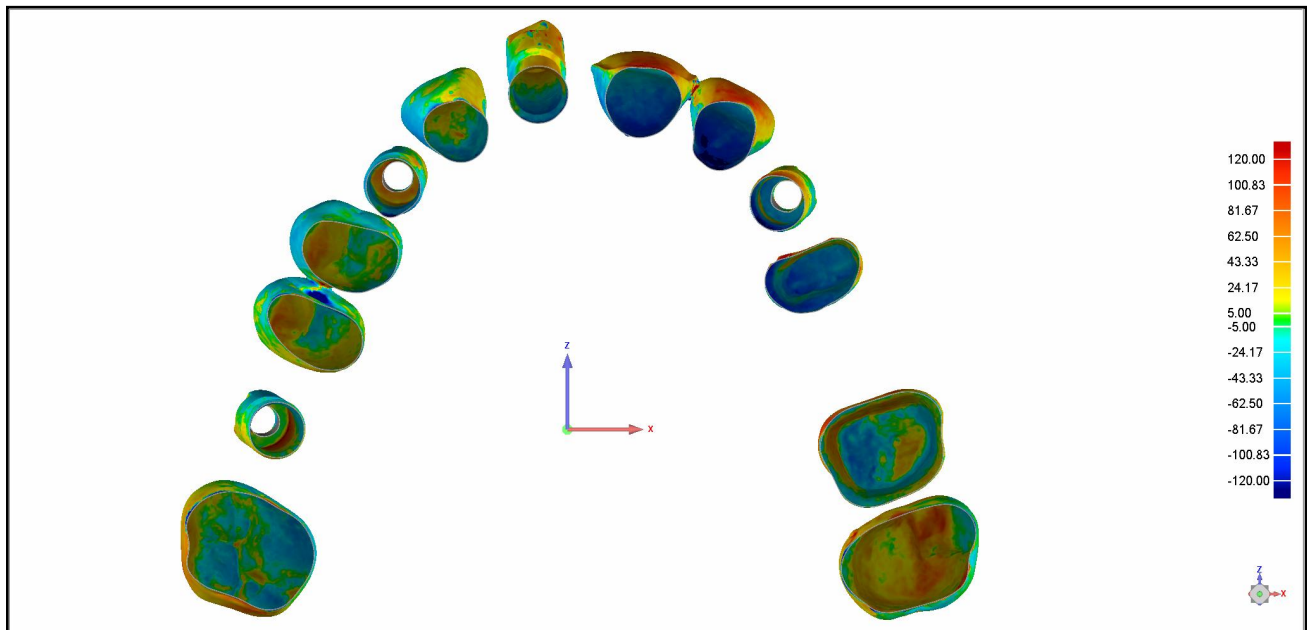

Predefinido: Atrás

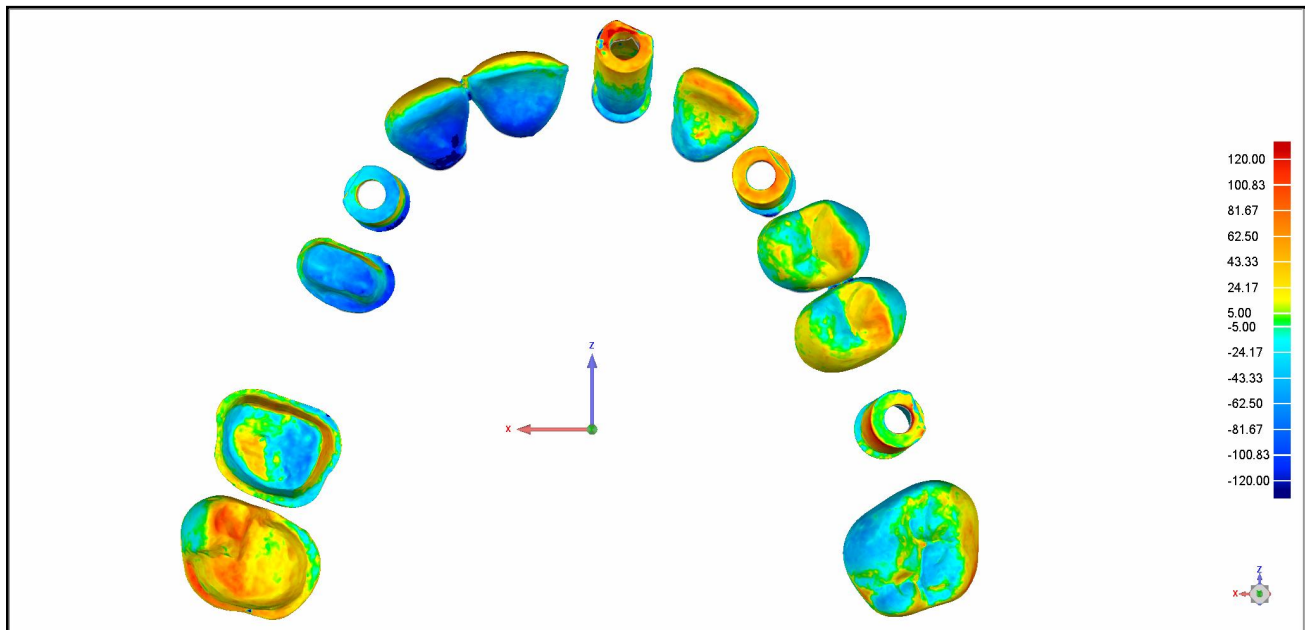

Predefinido: Izquierda

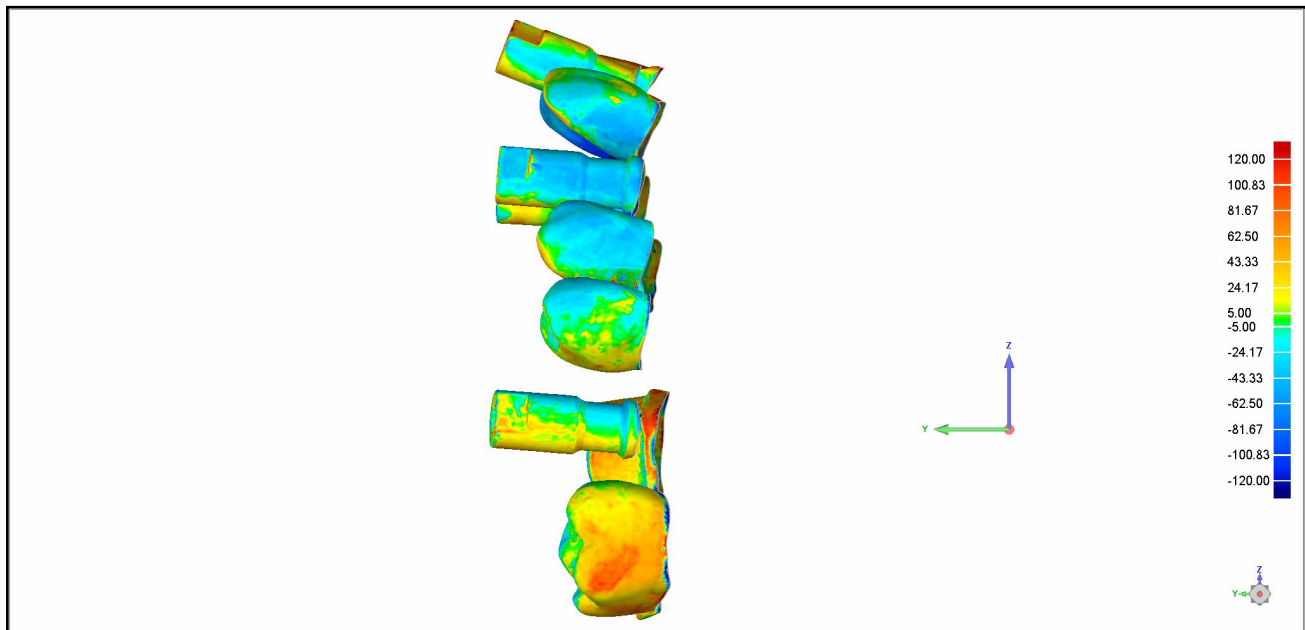

Predefinido: Derecha

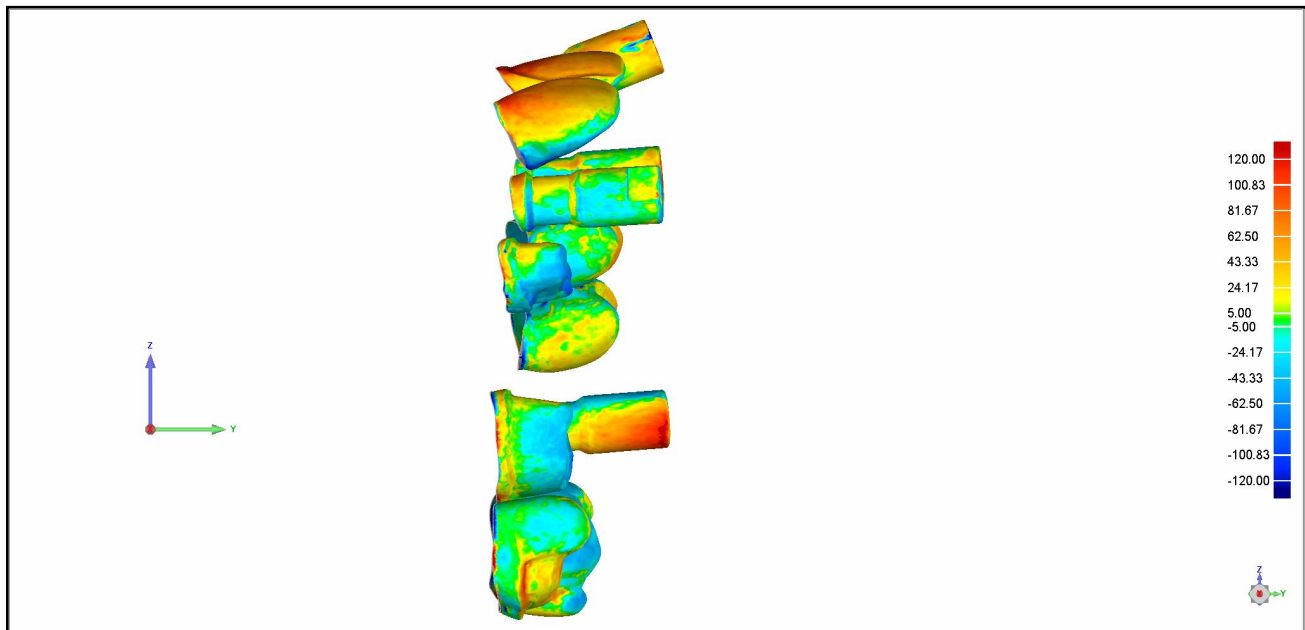

Predefinido: Superior

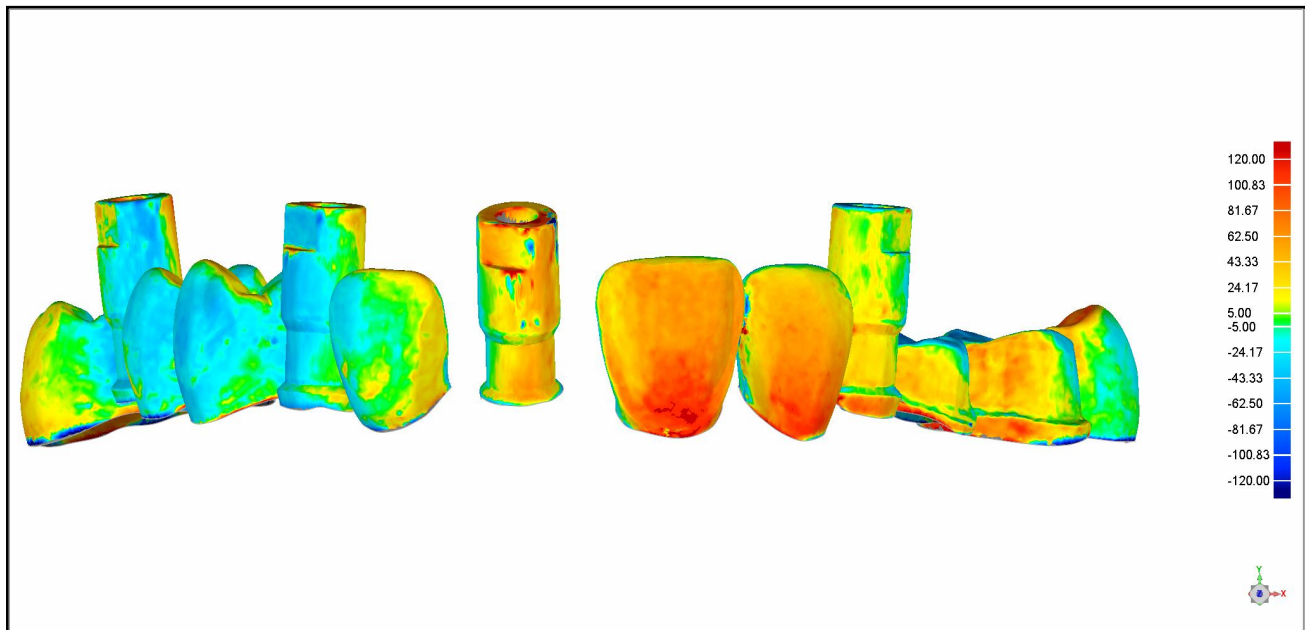

Predefinido: Inferior

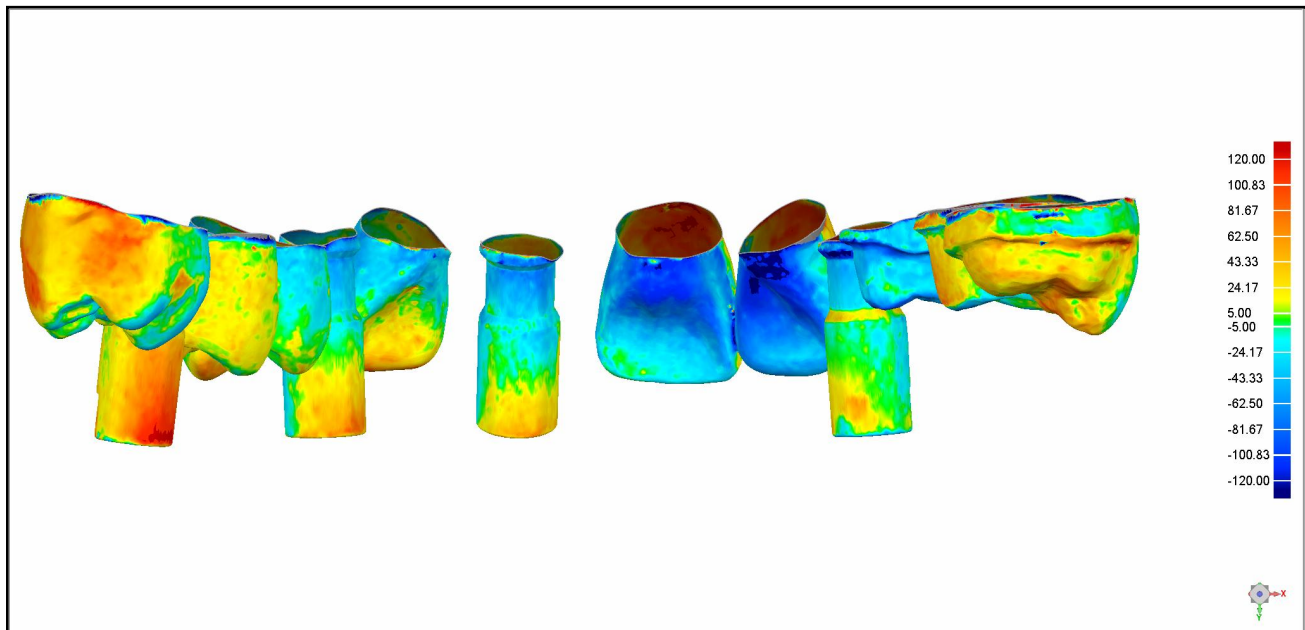



## Ajuste de ubicación: Desviaciones superior e inferior

Unidades: u

| Nombre         | Desv     | Estado | Superior Tol | Inferior Tol | Ref X     | Ref Y    | Ref Z    | Radio | Desv X   | Desv Y | Desv Z  | Medido X  | Medido Y | Medido Z | Dir. proy. X | Dir. proy. Y | Dir. proy. Z |
|----------------|----------|--------|--------------|--------------|-----------|----------|----------|-------|----------|--------|---------|-----------|----------|----------|--------------|--------------|--------------|
| Desv. inferior | -2268.21 |        |              |              | -16597.07 | 29132.89 | 5701.00  | n/a   | -2063.82 | 168.49 | -925.74 | -18660.90 | 29301.39 | 4775.26  | 0.91         | -0.07        | 0.41         |
| Desv. superior | 2503.71  |        |              |              | 25491.12  | 27467.20 | -5778.68 | n/a   | 2464.59  | 144.62 | -416.45 | 27955.71  | 27611.82 | -6195.13 | 0.98         | 0.06         | -0.17        |
