# Supplementary material for: Accuracy of four digital scanners according to scanning strategy in complete-arch impressions
Source: PLOS journal article supplement (doi:10.1371/journal.pone.0202916), 2018-09-13
Supplement: S13 (10.1371/journal.pone.0202916.s013) [file journal.pone.0202916.s013]

### 3D Comparación Resultados

|                       |        |
|-----------------------|--------|
| Modelo referencia     | MRC    |
| Modelo test           | TD9A   |
| Nº de puntos de datos | 129287 |
| # Aislados            | 388    |

|                 |               |
|-----------------|---------------|
| Tipo tolerancia | 3D desviación |
| Unidades        | u             |
| Máx. crítico    | 120.00        |
| Máx. nominal    | 13.00         |
| Mín. nominal    | -13.00        |
| Mín. crítico    | -120.00       |

|                          |               |
|--------------------------|---------------|
| Desviación               |               |
| Desviación superior máx. | 1866.02       |
| Desviación inferior máx. | -3019.21      |
| Desviación media         | 50.81 /-45.61 |
| Desviación estándar      | 93.62         |

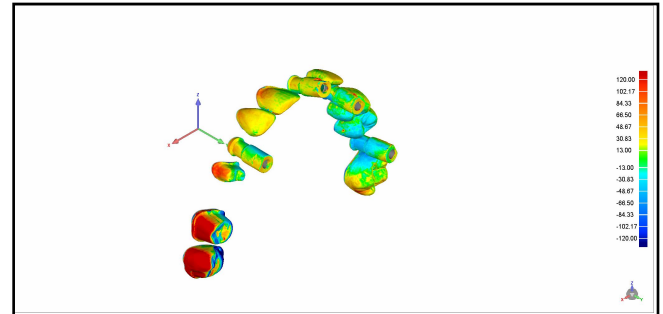

#### Distribución desviación

| >=Min   | <Max    | # Puntos | %     |
|---------|---------|----------|-------|
| -120.00 | -102.17 | 651      | 0.50  |
| -102.17 | -84.33  | 746      | 0.58  |
| -84.33  | -66.50  | 1360     | 1.05  |
| -66.50  | -48.67  | 3510     | 2.71  |
| -48.67  | -30.83  | 7901     | 6.11  |
| -30.83  | -13.00  | 15645    | 12.10 |
| -13.00  | 13.00   | 32071    | 24.81 |
| 13.00   | 30.83   | 24767    | 19.16 |
| 30.83   | 48.67   | 16776    | 12.98 |
| 48.67   | 66.50   | 6850     | 5.30  |
| 66.50   | 84.33   | 3120     | 2.41  |
| 84.33   | 102.17  | 1982     | 1.53  |
| 102.17  | 120.00  | 1341     | 1.04  |

|                            |      |      |
|----------------------------|------|------|
| Fuera del crítico superior | 7277 | 5.63 |
| Fuera del crítico inferior | 5290 | 4.09 |

Distribución desviación

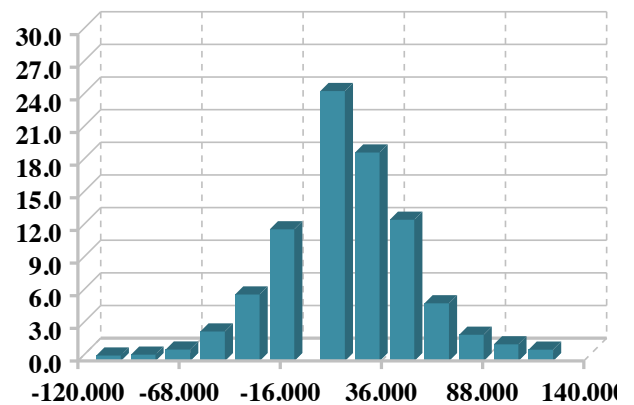

#### Desviaciones estándar

| Distribución (+/-)   | # Puntos | %     |
|----------------------|----------|-------|
| -6 * Desv. estándar. | 147      | 0.11  |
| -5 * Desv. estándar. | 64       | 0.05  |
| -4 * Desv. estándar. | 458      | 0.35  |
| -3 * Desv. estándar. | 2547     | 1.97  |
| -2 * Desv. estándar. | 3706     | 2.87  |
| -1 * Desv. estándar. | 61285    | 47.40 |
| 1 * Desv. estándar.  | 52912    | 40.93 |
| 2 * Desv. estándar.  | 4677     | 3.62  |
| 3 * Desv. estándar.  | 2549     | 1.97  |
| 4 * Desv. estándar.  | 432      | 0.33  |
| 5 * Desv. estándar.  | 90       | 0.07  |
| 6 * Desv. estándar.  | 420      | 0.32  |

Desviaciones estándar

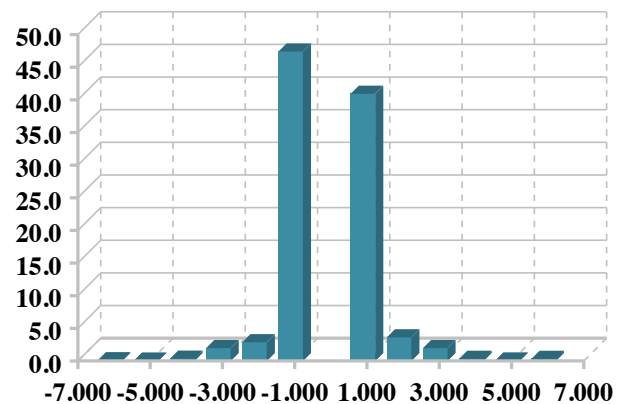

Predefinido: Isométrico

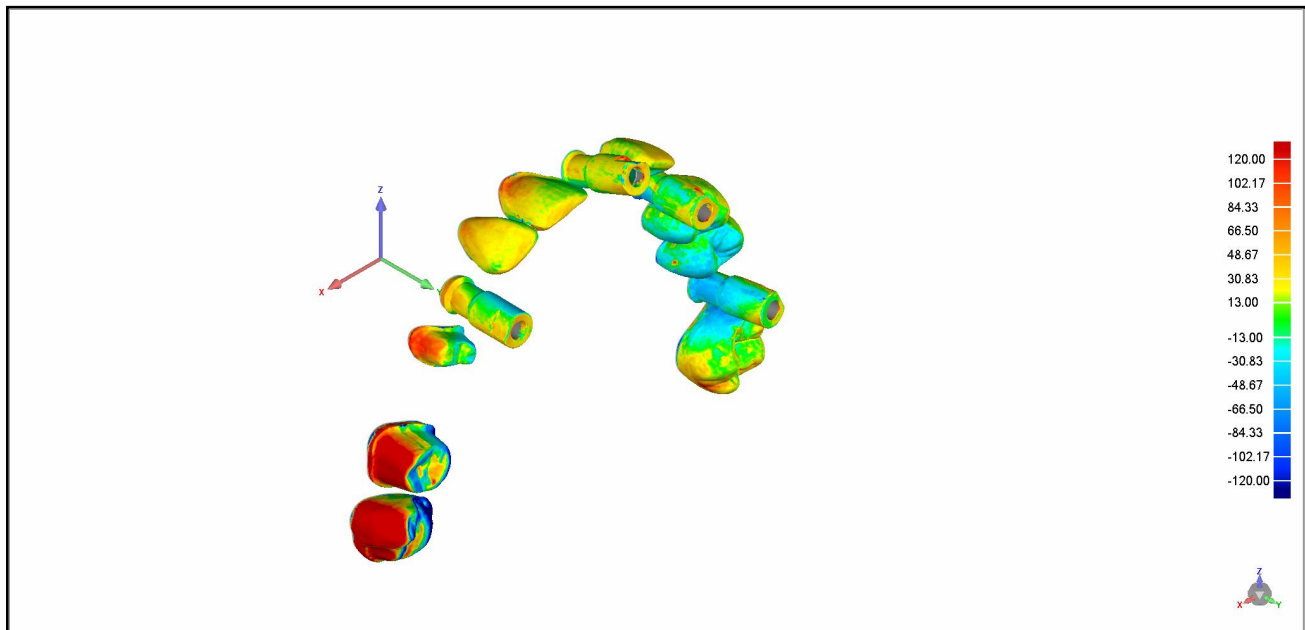

Predefinido: Frente

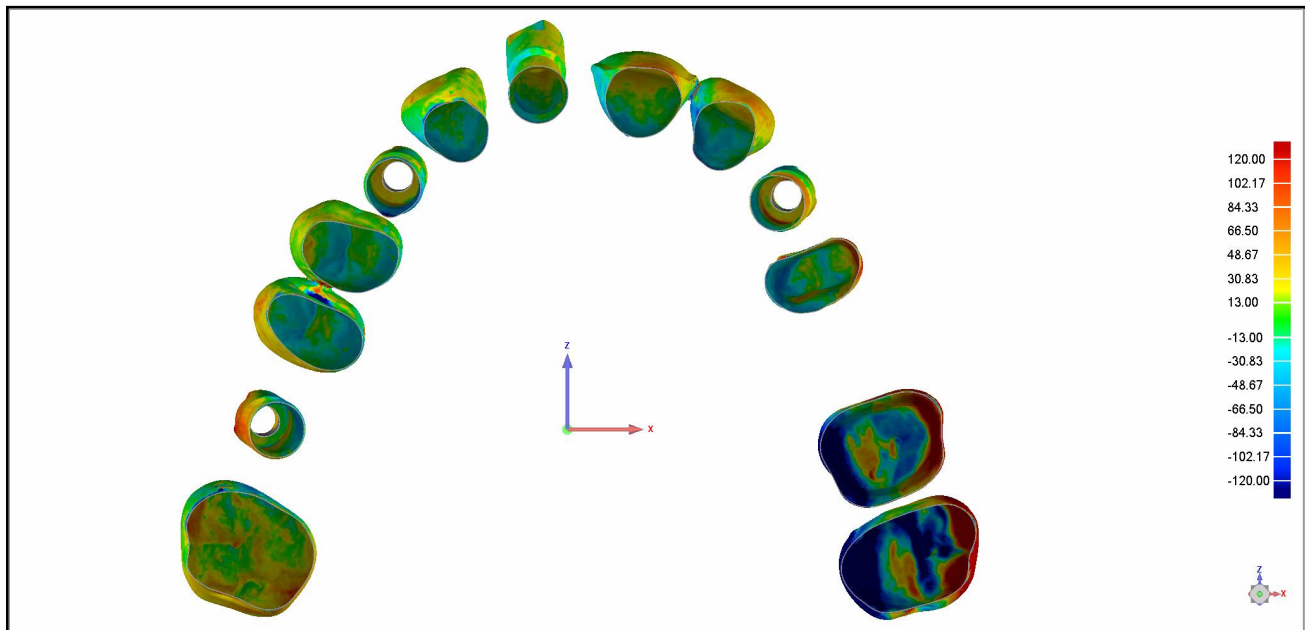

Predefinido: Atrás

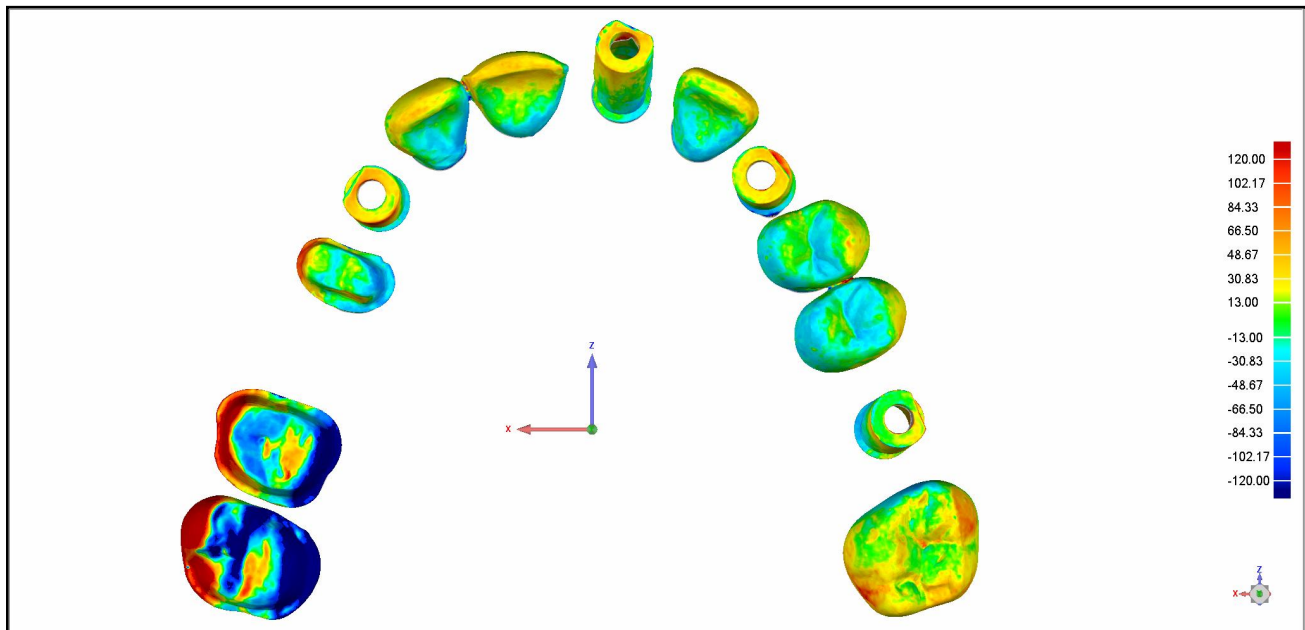

Predefinido: Izquierda

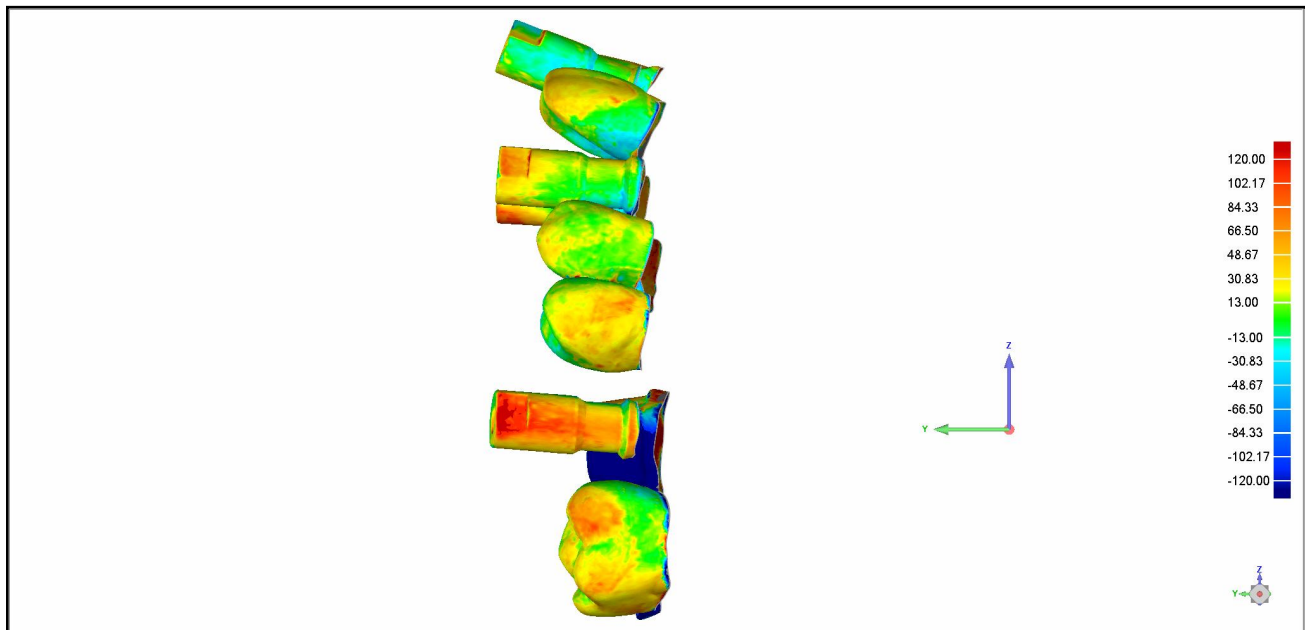

Predefinido: Derecha

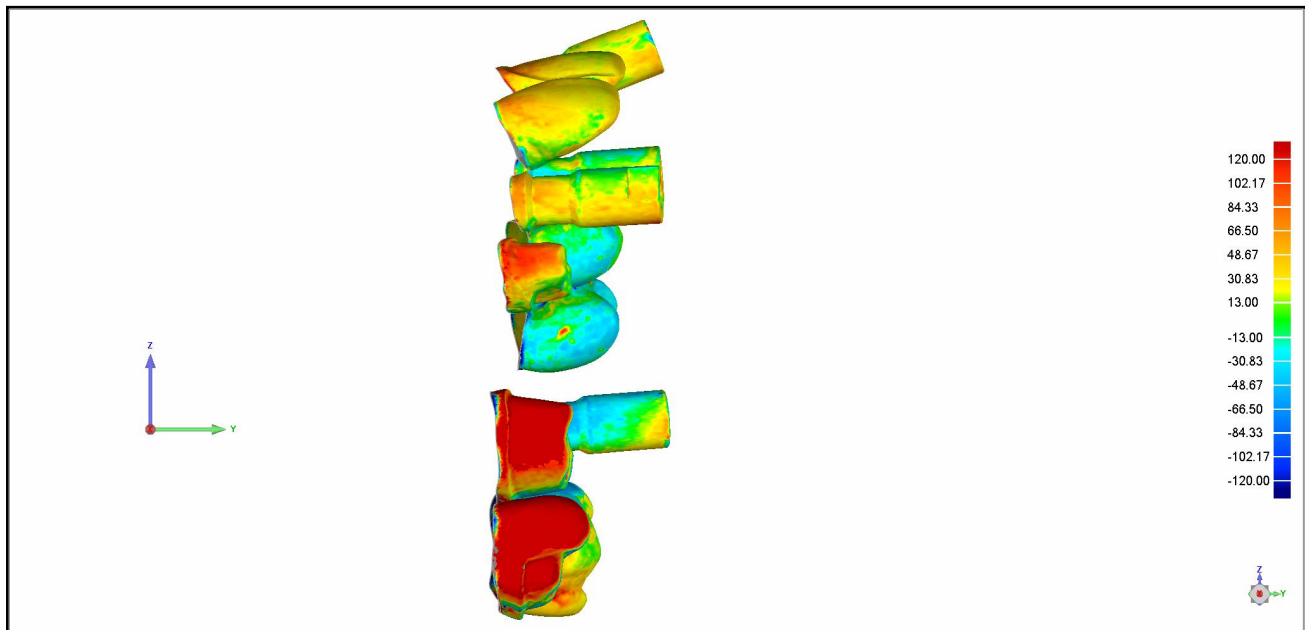

Predefinido: Superior

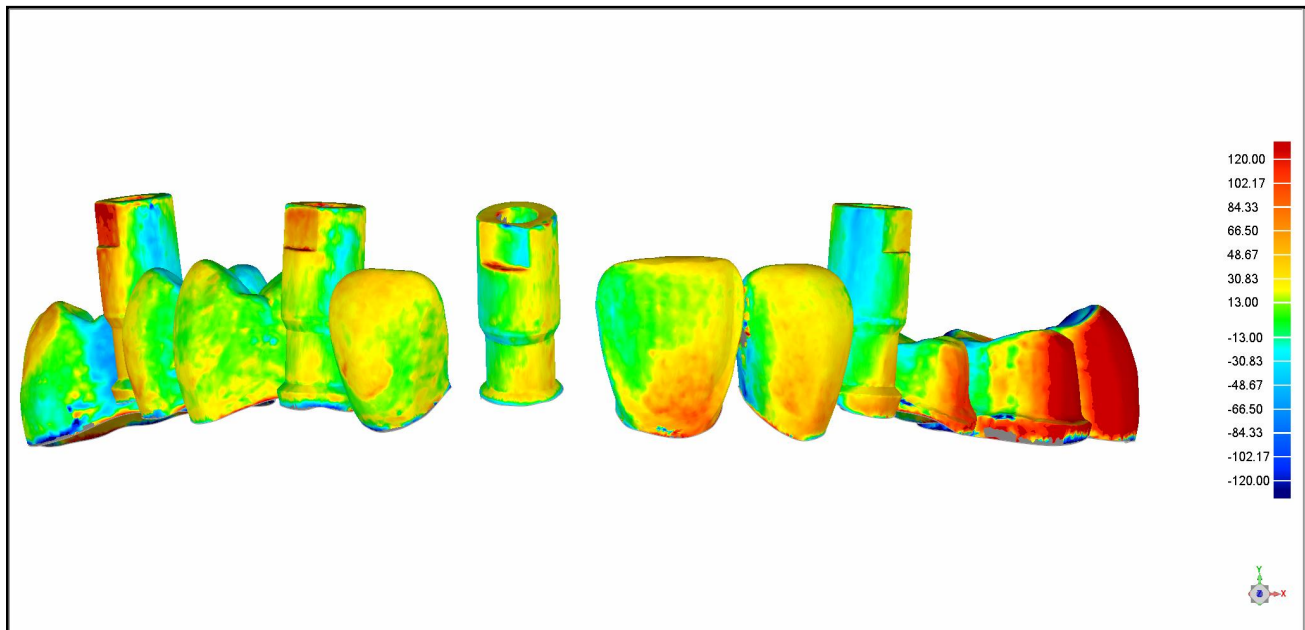

Predefinido: Inferior

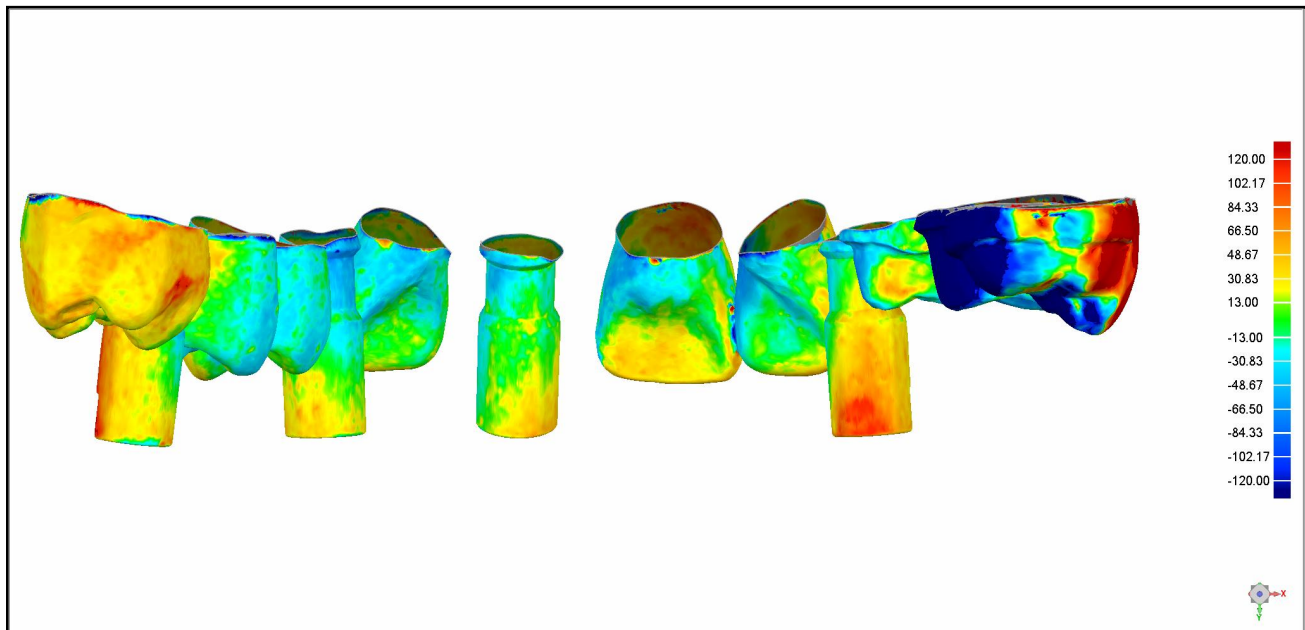



# Ajuste de ubicación: Desviaciones superior e inferior

Unidades: u

| Nombre         | Desv     | Estado | Superior Tol | Inferior Tol | Ref X    | Ref Y    | Ref Z     | Radio | Desv X  | Desv Y  | Desv Z   | Medido X | Medido Y | Medido Z  | Dir. proy. X | Dir. proy. Y | Dir. proy. Z |
|----------------|----------|--------|--------------|--------------|----------|----------|-----------|-------|---------|---------|----------|----------|----------|-----------|--------------|--------------|--------------|
| Desv. inferior | -3019.21 |        |              |              | 16989.02 | 37628.06 | 17251.36  | n/a   | 1337.67 | 2531.95 | -956.82  | 18326.68 | 40160.02 | 16294.54  | -0.44        | -0.84        | 0.32         |
| Desv. superior | 1866.02  |        |              |              | 31723.91 | 27105.47 | -10369.29 | n/a   | 18.63   | 21.59   | -1865.81 | 31742.53 | 27127.07 | -12235.10 | 0.01         | 0.01         | -1.00        |
