# Supplementary material for: Accuracy of four digital scanners according to scanning strategy in complete-arch impressions
Source: PLOS journal article supplement (doi:10.1371/journal.pone.0202916), 2018-09-13
Supplement: S13 (10.1371/journal.pone.0202916.s013) [file journal.pone.0202916.s013]

### 3D Comparación Resultados

|                       |        |
|-----------------------|--------|
| Modelo referencia     | MRC    |
| Modelo test           | TD3A   |
| Nº de puntos de datos | 129233 |
| # Aislados            | 418    |

|                 |               |
|-----------------|---------------|
| Tipo tolerancia | 3D desviación |
| Unidades        | u             |
| Máx. crítico    | 120.00        |
| Máx. nominal    | 7.00          |
| Mín. nominal    | -7.00         |
| Mín. crítico    | -120.00       |

|                          |               |
|--------------------------|---------------|
| Desviación               |               |
| Desviación superior máx. | 2924.25       |
| Desviación inferior máx. | -2699.40      |
| Desviación media         | 63.14 /-53.46 |
| Desviación estándar      | 86.91         |

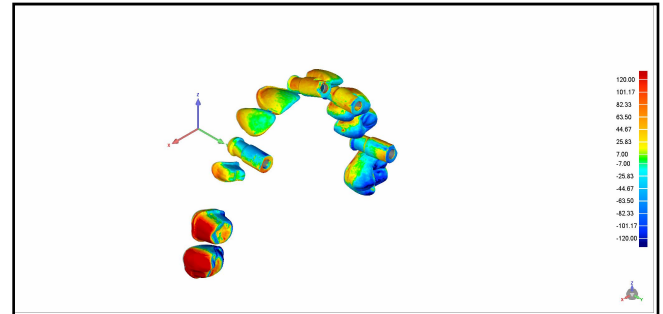

#### Distribución desviación

| >=Min   | <Max    | # Puntos | %     |
|---------|---------|----------|-------|
| -120.00 | -101.17 | 2513     | 1.94  |
| -101.17 | -82.33  | 4646     | 3.60  |
| -82.33  | -63.50  | 7473     | 5.78  |
| -63.50  | -44.67  | 10179    | 7.88  |
| -44.67  | -25.83  | 12425    | 9.61  |
| -25.83  | -7.00   | 14198    | 10.99 |
| -7.00   | 7.00    | 11324    | 8.76  |
| 7.00    | 25.83   | 15067    | 11.66 |
| 25.83   | 44.67   | 12909    | 9.99  |
| 44.67   | 63.50   | 10594    | 8.20  |
| 63.50   | 82.33   | 7005     | 5.42  |
| 82.33   | 101.17  | 4492     | 3.48  |
| 101.17  | 120.00  | 3116     | 2.41  |

|                            |      |      |
|----------------------------|------|------|
| Fuera del crítico superior | 8486 | 6.57 |
| Fuera del crítico inferior | 4806 | 3.72 |

Distribución desviación

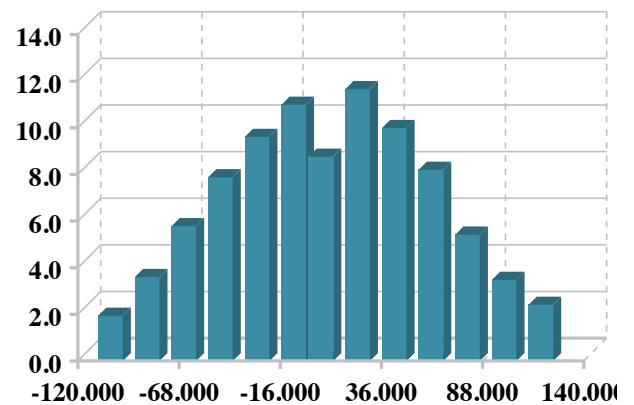

#### Desviaciones estándar

| Distribución (+/-)   | # Puntos | %     |
|----------------------|----------|-------|
| -6 * Desv. estándar. | 38       | 0.03  |
| -5 * Desv. estándar. | 79       | 0.06  |
| -4 * Desv. estándar. | 146      | 0.11  |
| -3 * Desv. estándar. | 1767     | 1.37  |
| -2 * Desv. estándar. | 10798    | 8.36  |
| -1 * Desv. estándar. | 54961    | 42.53 |
| 1 * Desv. estándar.  | 48381    | 37.44 |
| 2 * Desv. estándar.  | 9510     | 7.36  |
| 3 * Desv. estándar.  | 2272     | 1.76  |
| 4 * Desv. estándar.  | 984      | 0.76  |
| 5 * Desv. estándar.  | 93       | 0.07  |
| 6 * Desv. estándar.  | 204      | 0.16  |

Desviaciones estándar

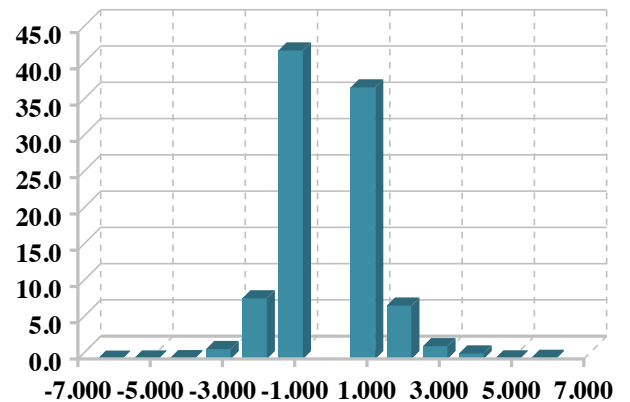

Predefinido: Isométrico

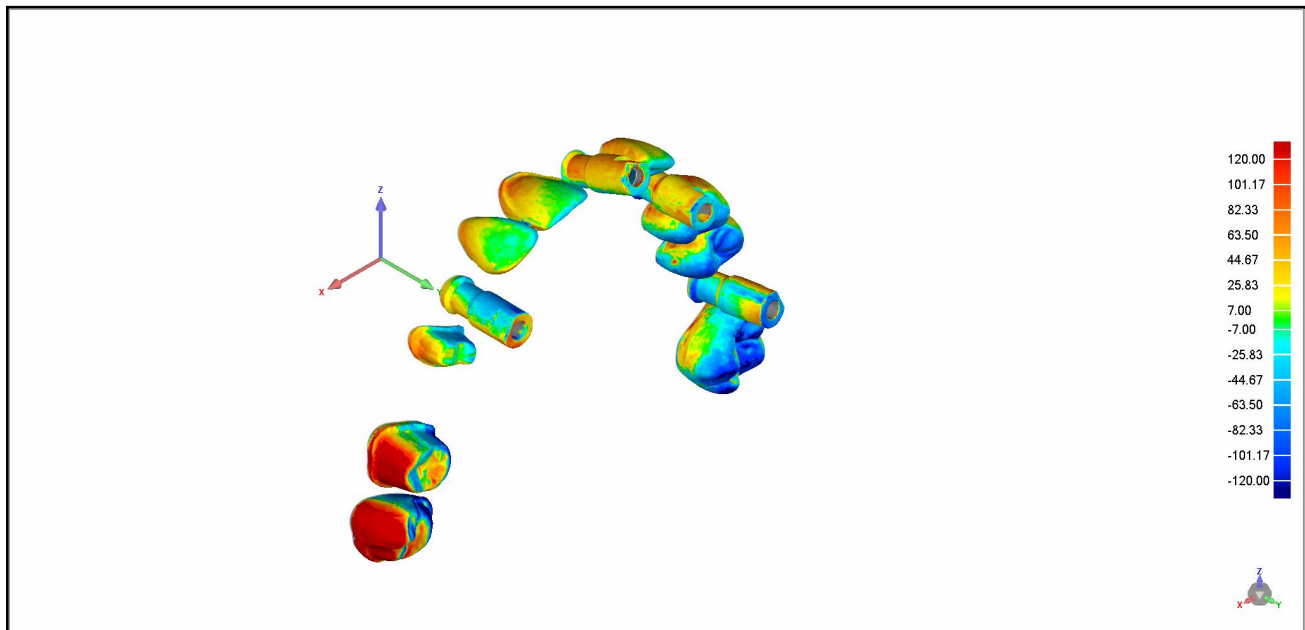

Predefinido: Frente

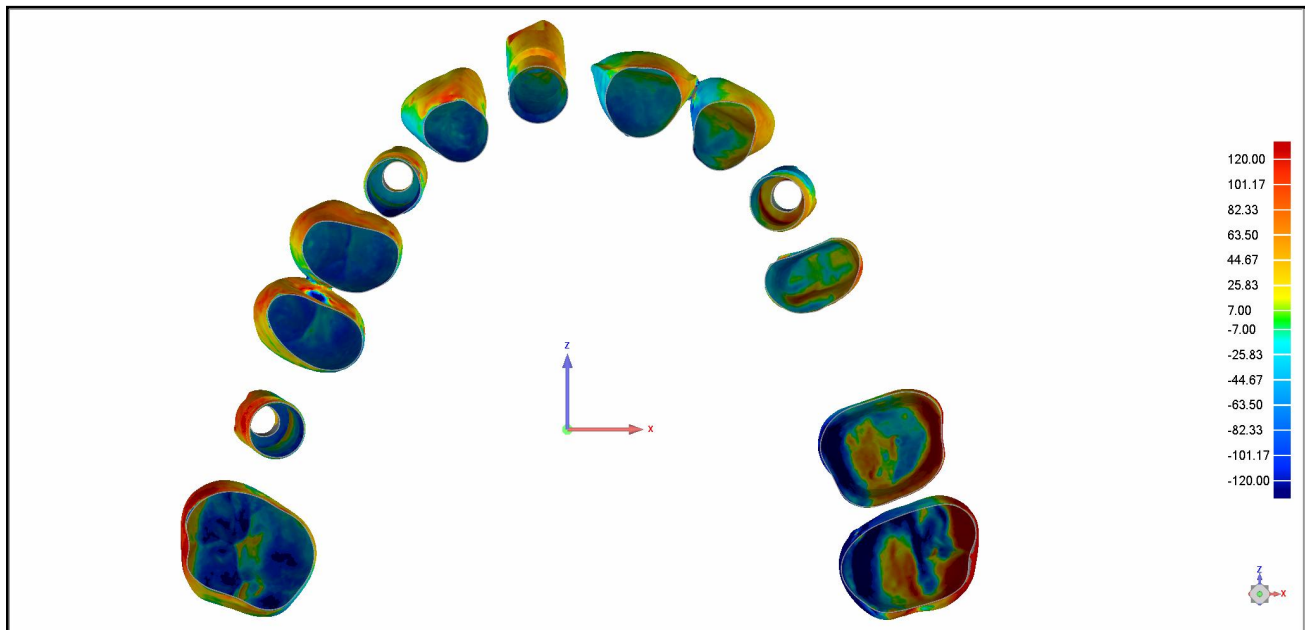

Predefinido: Atrás

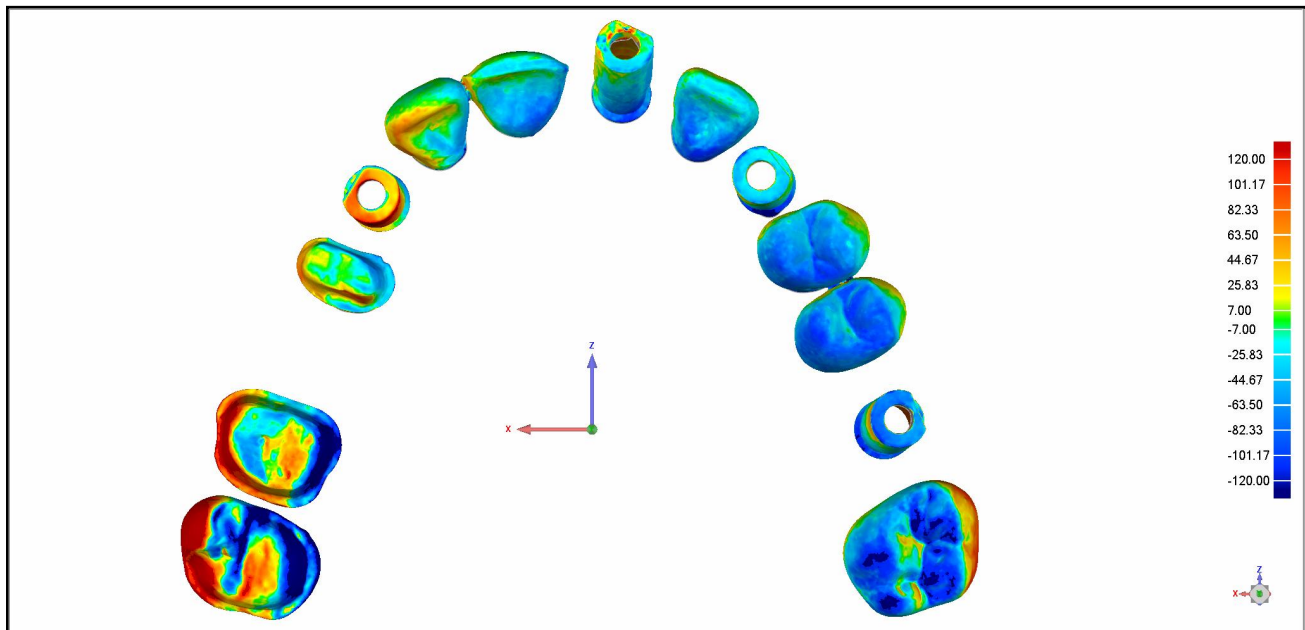

Predefinido: Izquierda

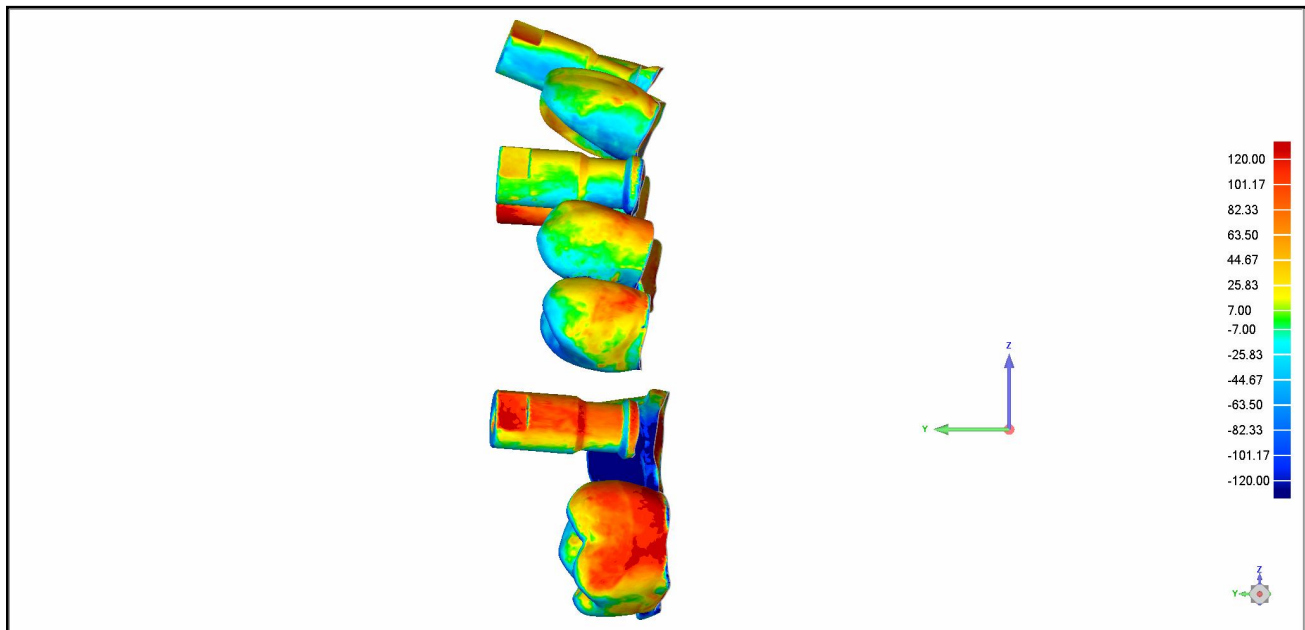

Predefinido: Derecha

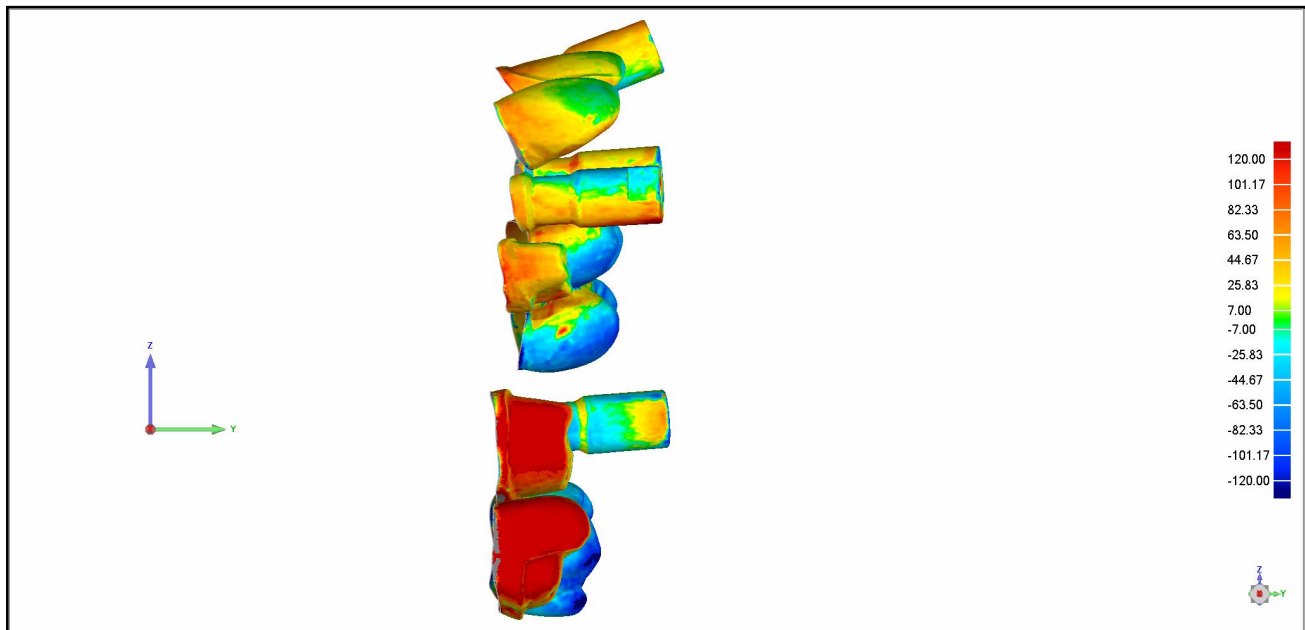

Predefinido: Superior

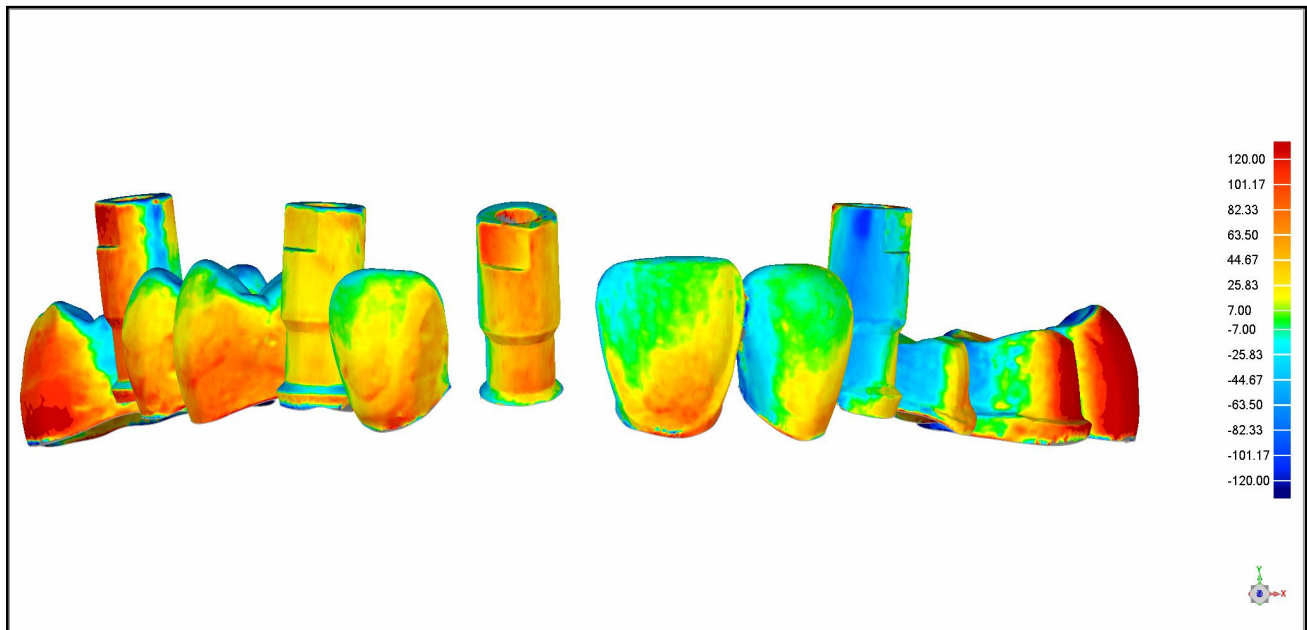

Predefinido: Inferior

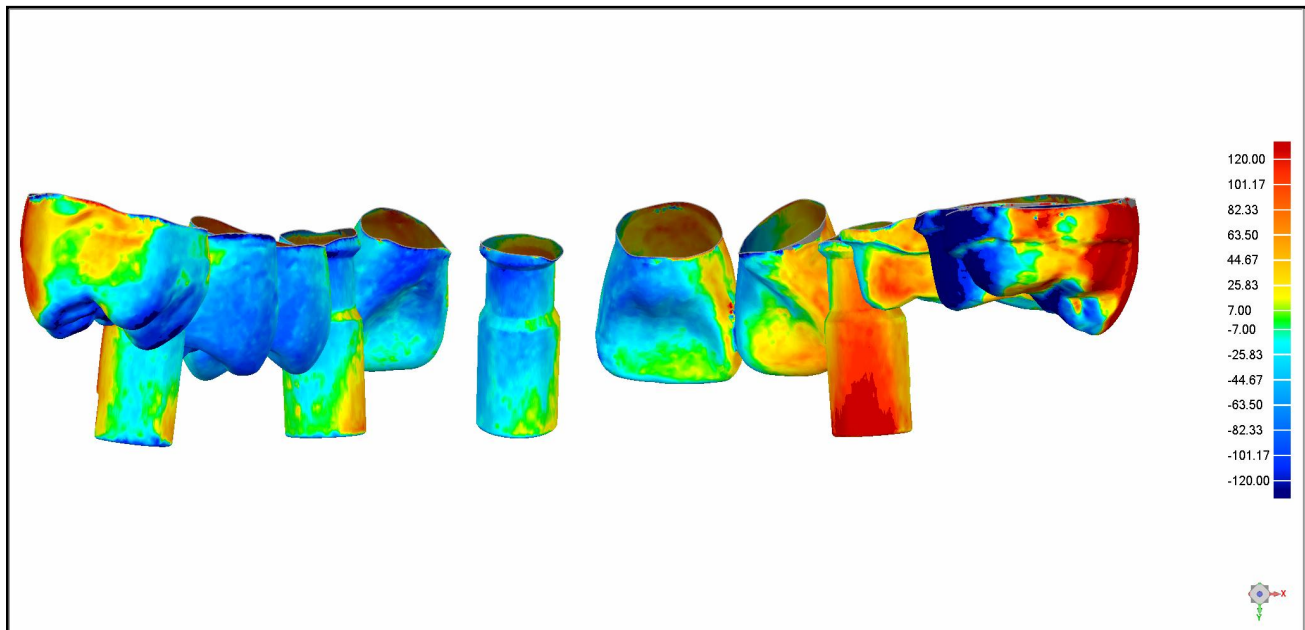



# Ajuste de ubicación: Desviaciones superior e inferior

Unidades: u

| Nombre         | Desv     | Estado | Superior Tol | Inferior Tol | Ref X    | Ref Y    | Ref Z    | Radio | Desv X   | Desv Y | Desv Z  | Medido X | Medido Y | Medido Z | Dir. proy. X | Dir. proy. Y | Dir. proy. Z |
|----------------|----------|--------|--------------|--------------|----------|----------|----------|-------|----------|--------|---------|----------|----------|----------|--------------|--------------|--------------|
| Desv. inferior | -2699.40 |        |              |              | 32064.02 | 27122.94 | -7196.92 | n/a   | -2364.64 | 164.79 | 1291.53 | 29699.38 | 27287.72 | -5905.39 | 0.88         | -0.06        | -0.48        |
| Desv. superior | 2924.25  |        |              |              | 25410.11 | 27462.45 | -5764.99 | n/a   | 2840.74  | -20.67 | -693.56 | 28250.85 | 27441.78 | -6458.55 | 0.97         | -0.01        | -0.24        |
