# Supplementary material for: Accuracy of four digital scanners according to scanning strategy in complete-arch impressions
Source: PLOS journal article supplement (doi:10.1371/journal.pone.0202916), 2018-09-13
Supplement: S13 (10.1371/journal.pone.0202916.s013) [file journal.pone.0202916.s013]

### 3D Comparación Resultados

|                       |        |
|-----------------------|--------|
| Modelo referencia     | MRC    |
| Modelo test           | TD10A  |
| Nº de puntos de datos | 129082 |
| # Aislados            | 371    |

|                 |               |
|-----------------|---------------|
| Tipo tolerancia | 3D desviación |
| Unidades        | u             |
| Máx. crítico    | 120.00        |
| Máx. nominal    | 11.00         |
| Mín. nominal    | -11.00        |
| Mín. crítico    | -120.00       |

|                          |                |
|--------------------------|----------------|
| Desviación               |                |
| Desviación superior máx. | 2763.99        |
| Desviación inferior máx. | -2509.23       |
| Desviación media         | 49.80 / -38.07 |
| Desviación estándar      | 77.36          |

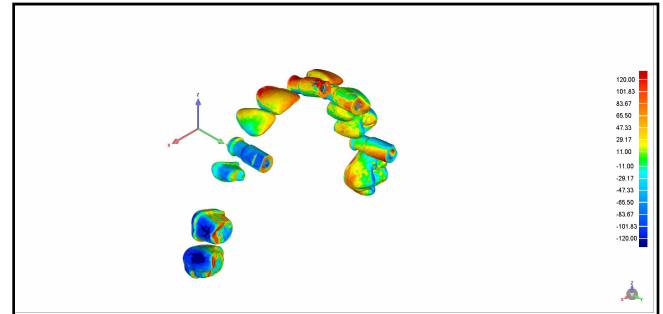

#### Distribución desviación

| >=Min   | <Max    | # Puntos | %     |
|---------|---------|----------|-------|
| -120.00 | -101.83 | 1665     | 1.29  |
| -101.83 | -83.67  | 2531     | 1.96  |
| -83.67  | -65.50  | 4483     | 3.47  |
| -65.50  | -47.33  | 6184     | 4.79  |
| -47.33  | -29.17  | 9783     | 7.58  |
| -29.17  | -11.00  | 16252    | 12.59 |
| -11.00  | 11.00   | 27660    | 21.43 |
| 11.00   | 29.17   | 18748    | 14.52 |
| 29.17   | 47.33   | 12407    | 9.61  |
| 47.33   | 65.50   | 8561     | 6.63  |
| 65.50   | 83.67   | 6677     | 5.17  |
| 83.67   | 101.83  | 4322     | 3.35  |
| 101.83  | 120.00  | 2947     | 2.28  |

|                            |      |      |
|----------------------------|------|------|
| Fuera del crítico superior | 5302 | 4.11 |
| Fuera del crítico inferior | 1560 | 1.21 |

Distribución desviación

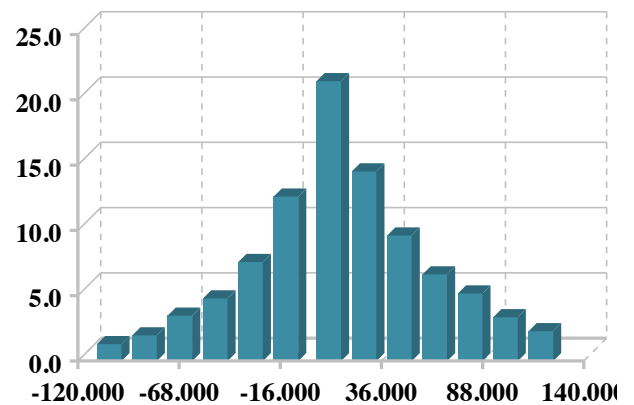

#### Desviaciones estándar

| Distribución (+/-)   | # Puntos | %     |
|----------------------|----------|-------|
| -6 * Desv. estándar. | 80       | 0.06  |
| -5 * Desv. estándar. | 39       | 0.03  |
| -4 * Desv. estándar. | 125      | 0.10  |
| -3 * Desv. estándar. | 348      | 0.27  |
| -2 * Desv. estándar. | 9549     | 7.40  |
| -1 * Desv. estándar. | 60558    | 46.91 |
| 1 * Desv. estándar.  | 47223    | 36.58 |
| 2 * Desv. estándar.  | 9888     | 7.66  |
| 3 * Desv. estándar.  | 727      | 0.56  |
| 4 * Desv. estándar.  | 169      | 0.13  |
| 5 * Desv. estándar.  | 110      | 0.09  |
| 6 * Desv. estándar.  | 266      | 0.21  |

Desviaciones estándar

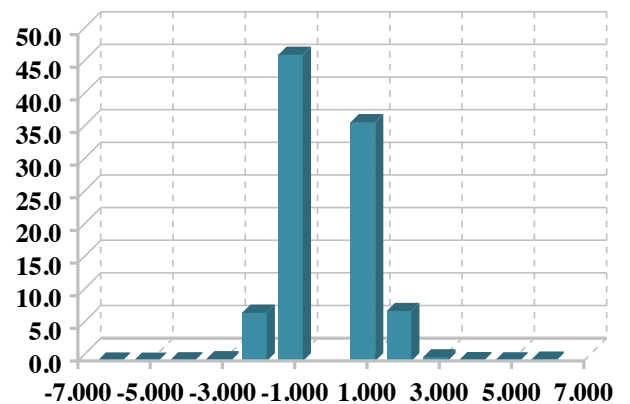

Predefinido: Isométrico

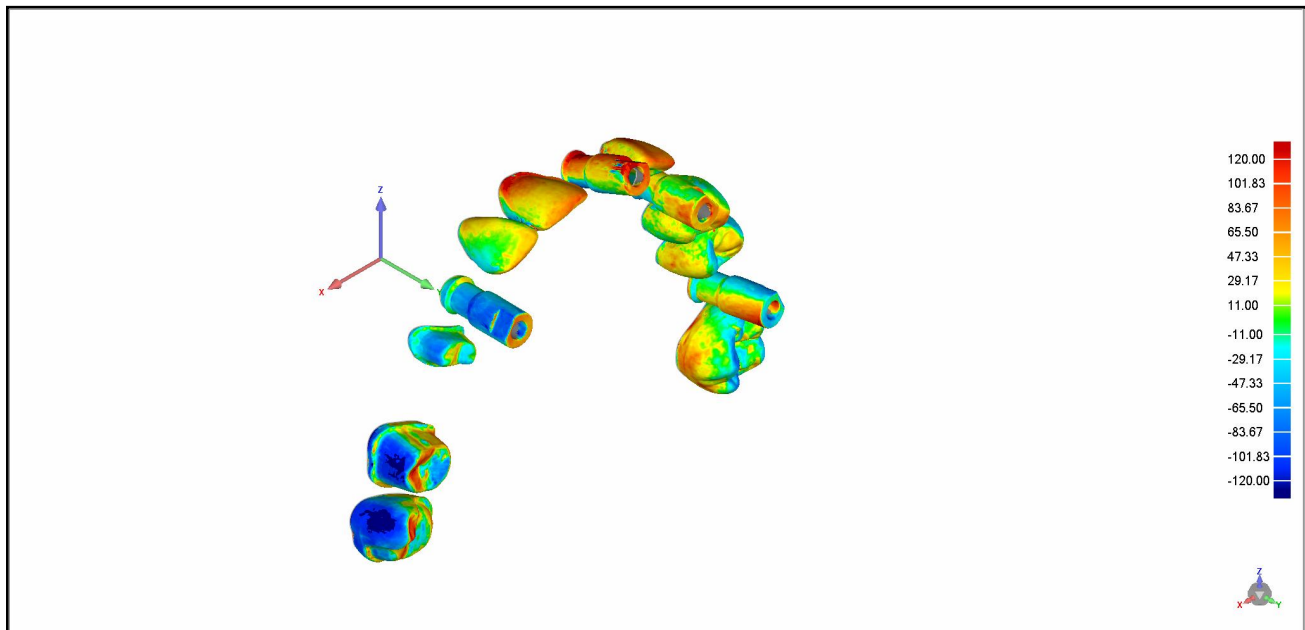

Predefinido: Frente

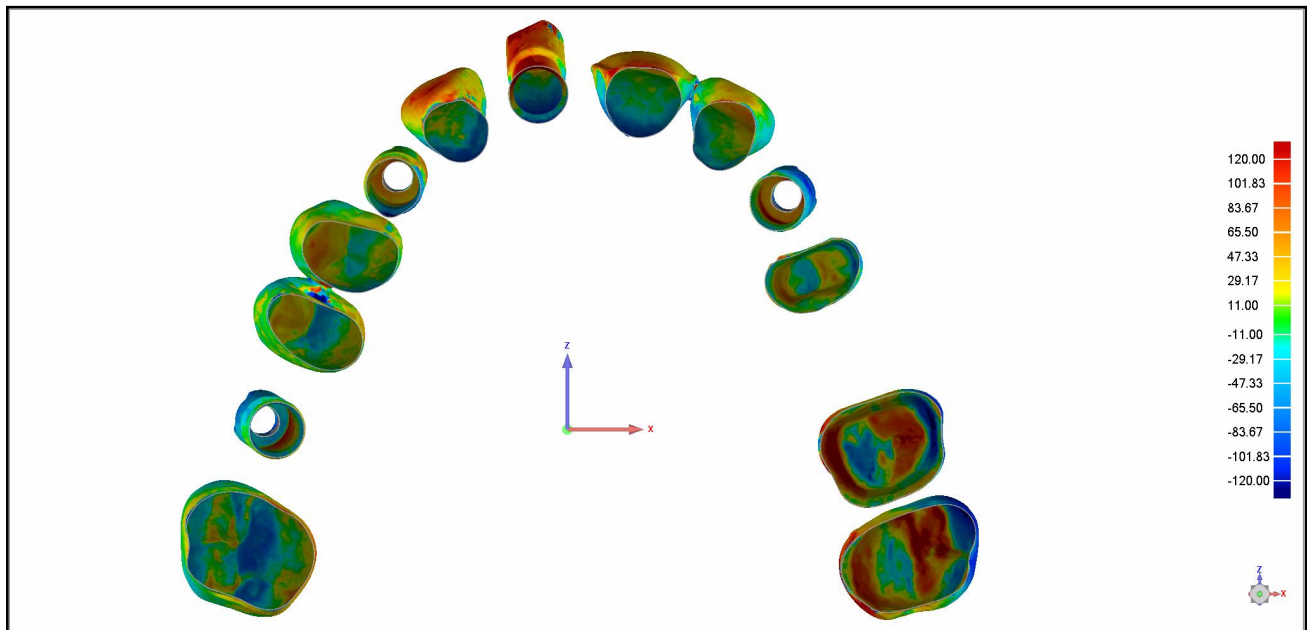

Predefinido: Atrás

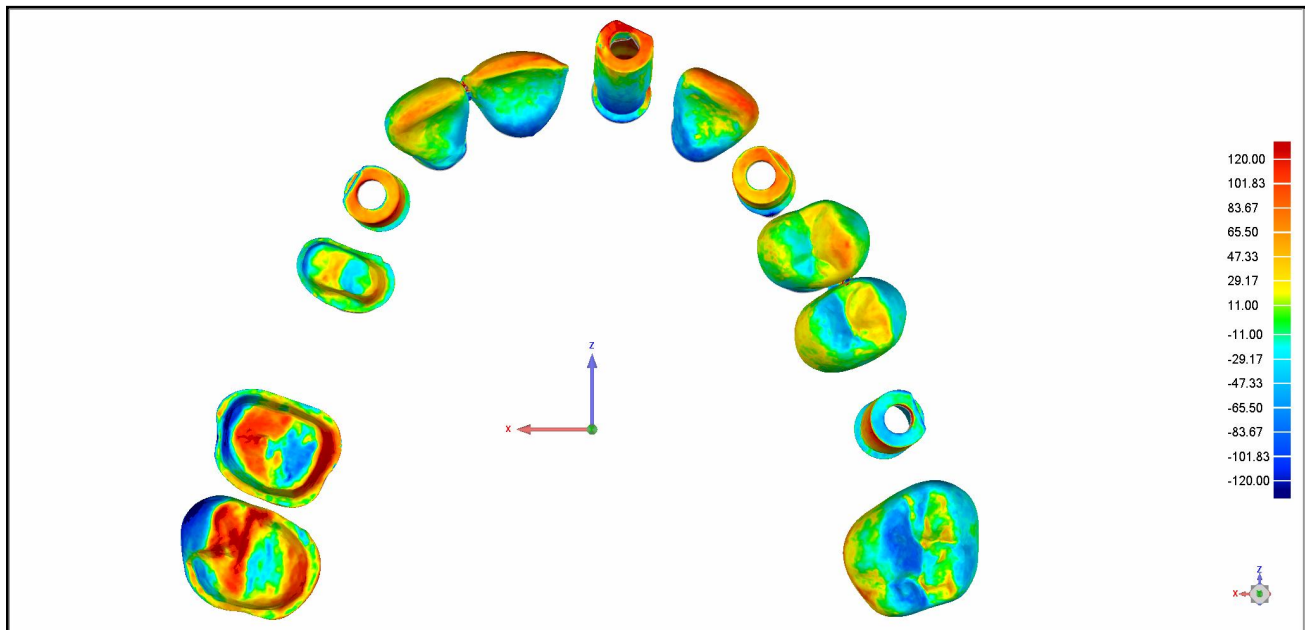

Predefinido: Izquierda

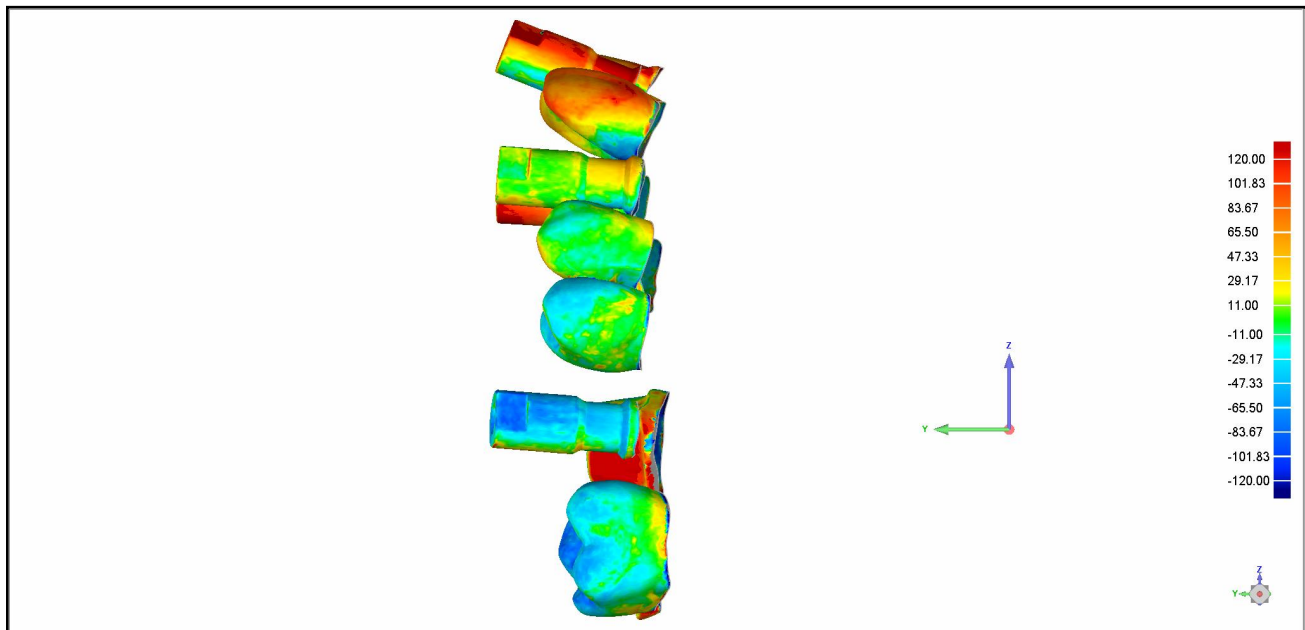

Predefinido: Derecha

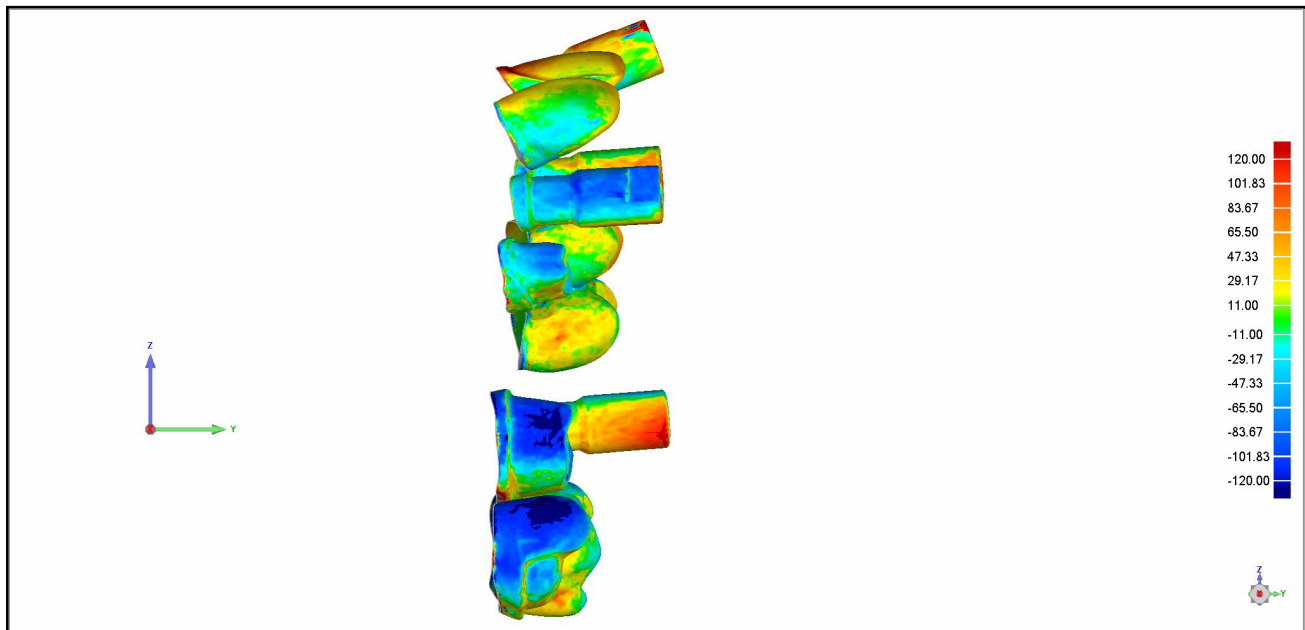

Predefinido: Superior

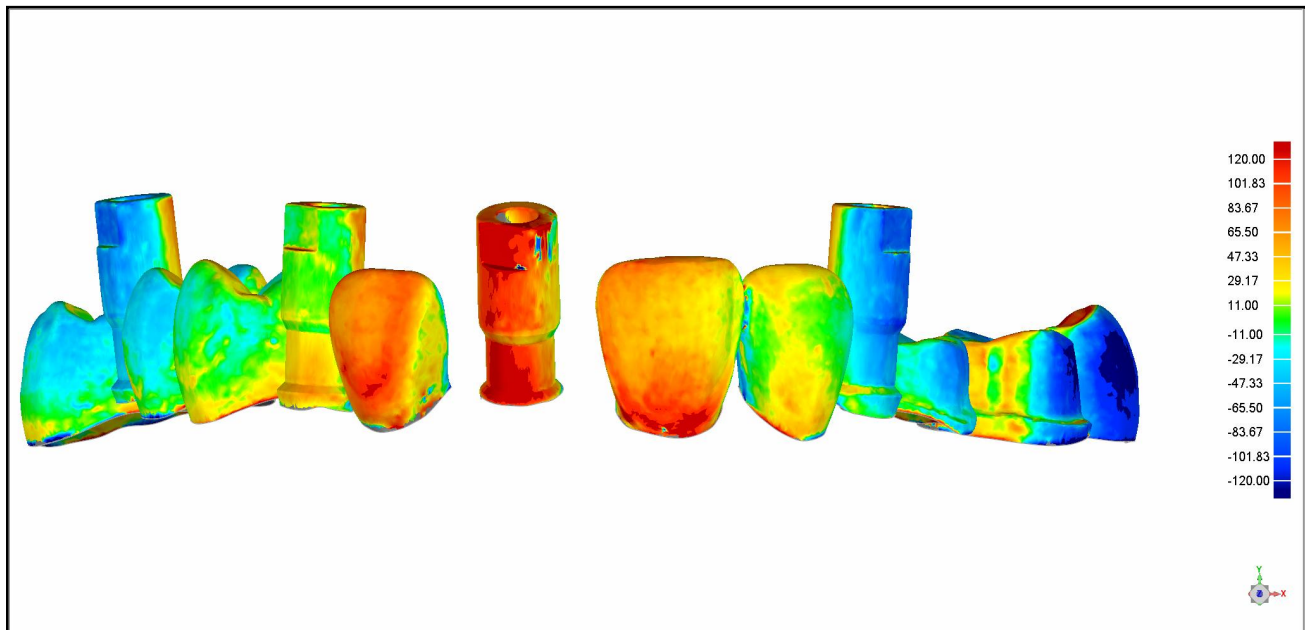

Predefinido: Inferior

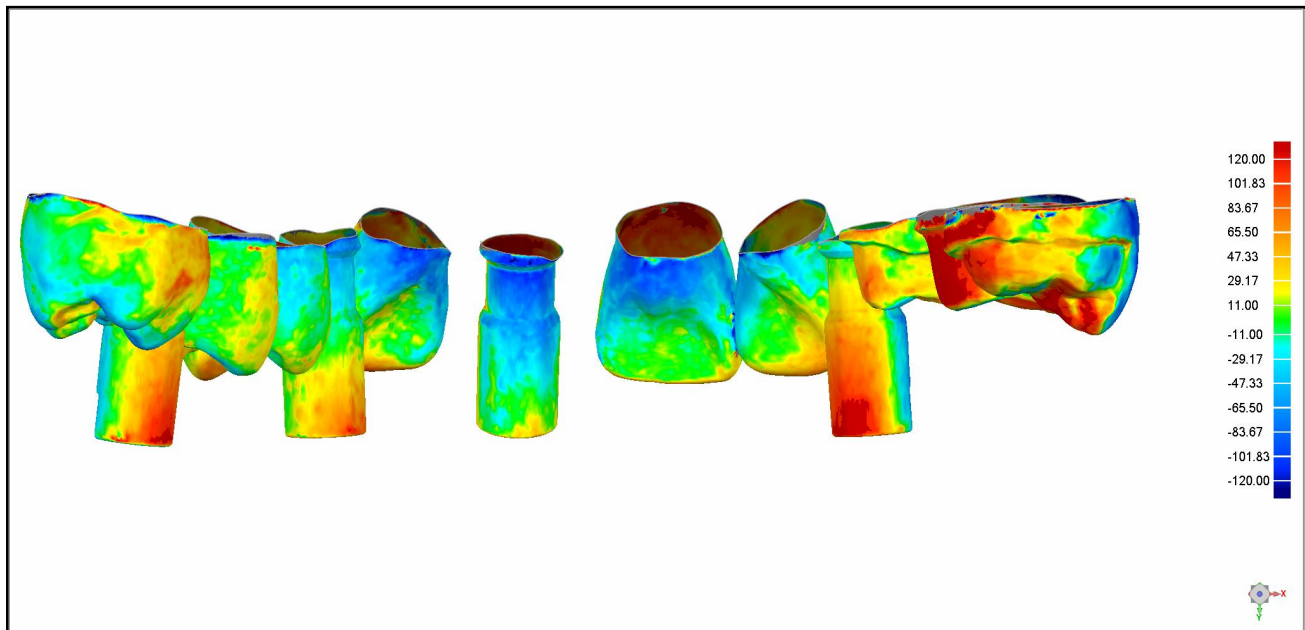



Ajuste de ubicación: Desviaciones superior e inferior

Unidades: u

| Nombre         | Desv     | Estado | Superior Tol | Inferior Tol | Ref X    | Ref Y    | Ref Z    | Radio | Desv X  | Desv Y | Desv Z   | Medido X | Medido Y | Medido Z | Dir. proy. X | Dir. proy. Y | Dir. proy. Z |
|----------------|----------|--------|--------------|--------------|----------|----------|----------|-------|---------|--------|----------|----------|----------|----------|--------------|--------------|--------------|
| Desv. inferior | -2509.23 |        |              |              | -2424.02 | 36916.12 | 31336.11 | n/a   | 1003.97 | 186.67 | -2292.04 | -1420.05 | 37102.79 | 29044.07 | -0.40        | -0.07        | 0.91         |
| Desv. superior | 2763.99  |        |              |              | 16989.02 | 37628.06 | 17251.36 | n/a   | 2612.64 | -58.25 | 900.20   | 19601.65 | 37569.81 | 18151.56 | 0.95         | -0.02        | 0.33         |
