# Supplementary material for: Accuracy of four digital scanners according to scanning strategy in complete-arch impressions
Source: PLOS journal article supplement (doi:10.1371/journal.pone.0202916), 2018-09-13
Supplement: S13 (10.1371/journal.pone.0202916.s013) [file journal.pone.0202916.s013]

### 3D Comparación Resultados

|                       |        |
|-----------------------|--------|
| Modelo referencia     | MRC    |
| Modelo test           | TD1A   |
| Nº de puntos de datos | 130778 |
| # Aislados            | 284    |

|                 |               |
|-----------------|---------------|
| Tipo tolerancia | 3D desviación |
| Unidades        | u             |
| Máx. crítico    | 120.00        |
| Máx. nominal    | 12.00         |
| Mín. nominal    | -12.00        |
| Mín. crítico    | -120.00       |

|                          |                |
|--------------------------|----------------|
| Desviación               |                |
| Desviación superior máx. | 1985.89        |
| Desviación inferior máx. | -2119.41       |
| Desviación media         | 40.77 / -26.64 |
| Desviación estándar      | 83.77          |

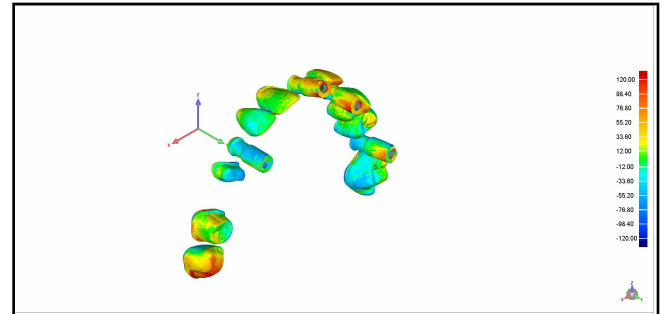

#### Distribución desviación

| >=Min   | <Max   | # Puntos | %     |
|---------|--------|----------|-------|
| -120.00 | -98.40 | 298      | 0.23  |
| -98.40  | -76.80 | 676      | 0.52  |
| -76.80  | -55.20 | 2563     | 1.96  |
| -55.20  | -33.60 | 8464     | 6.47  |
| -33.60  | -12.00 | 22292    | 17.05 |
| -12.00  | 12.00  | 40246    | 30.77 |
| 12.00   | 33.60  | 26571    | 20.32 |
| 33.60   | 55.20  | 14136    | 10.81 |
| 55.20   | 76.80  | 6811     | 5.21  |
| 76.80   | 98.40  | 3711     | 2.84  |
| 98.40   | 120.00 | 1964     | 1.50  |

|                            |      |      |
|----------------------------|------|------|
| Fuera del crítico superior | 2138 | 1.63 |
| Fuera del crítico inferior | 908  | 0.69 |

Distribución desviación

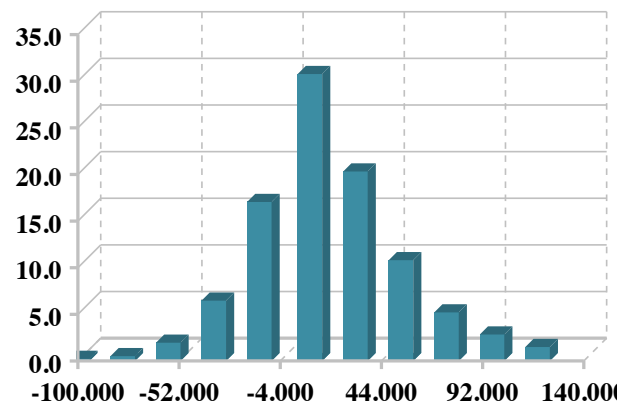

#### Desviaciones estándar

| Distribución (+/-)   | # Puntos | %     |
|----------------------|----------|-------|
| -6 * Desv. estándar. | 164      | 0.13  |
| -5 * Desv. estándar. | 41       | 0.03  |
| -4 * Desv. estándar. | 98       | 0.07  |
| -3 * Desv. estándar. | 291      | 0.22  |
| -2 * Desv. estándar. | 1663     | 1.27  |
| -1 * Desv. estándar. | 73340    | 56.08 |
| 1 * Desv. estándar.  | 50777    | 38.83 |
| 2 * Desv. estándar.  | 3327     | 2.54  |
| 3 * Desv. estándar.  | 270      | 0.21  |
| 4 * Desv. estándar.  | 168      | 0.13  |
| 5 * Desv. estándar.  | 94       | 0.07  |
| 6 * Desv. estándar.  | 545      | 0.42  |

Desviaciones estándar

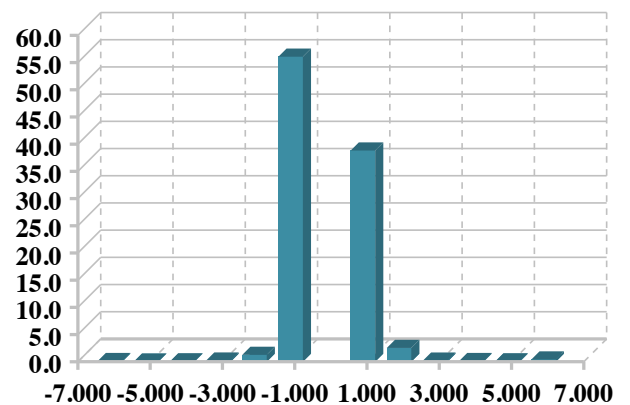

Predefinido: Isométrico

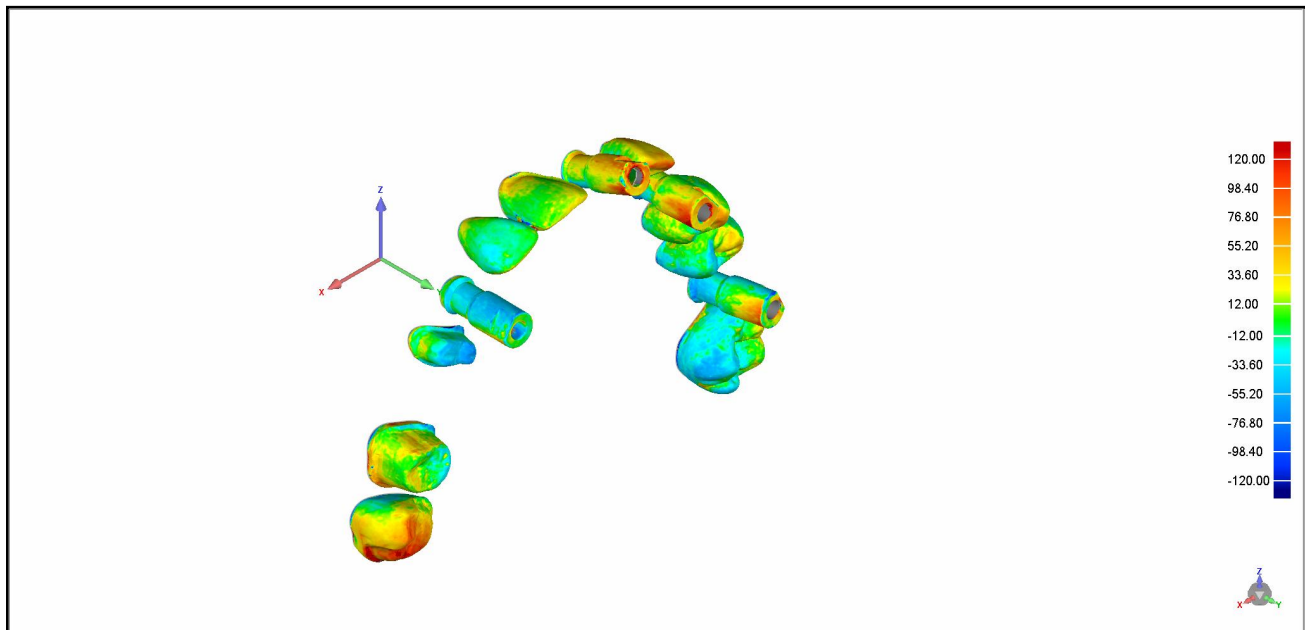

Predefinido: Frente

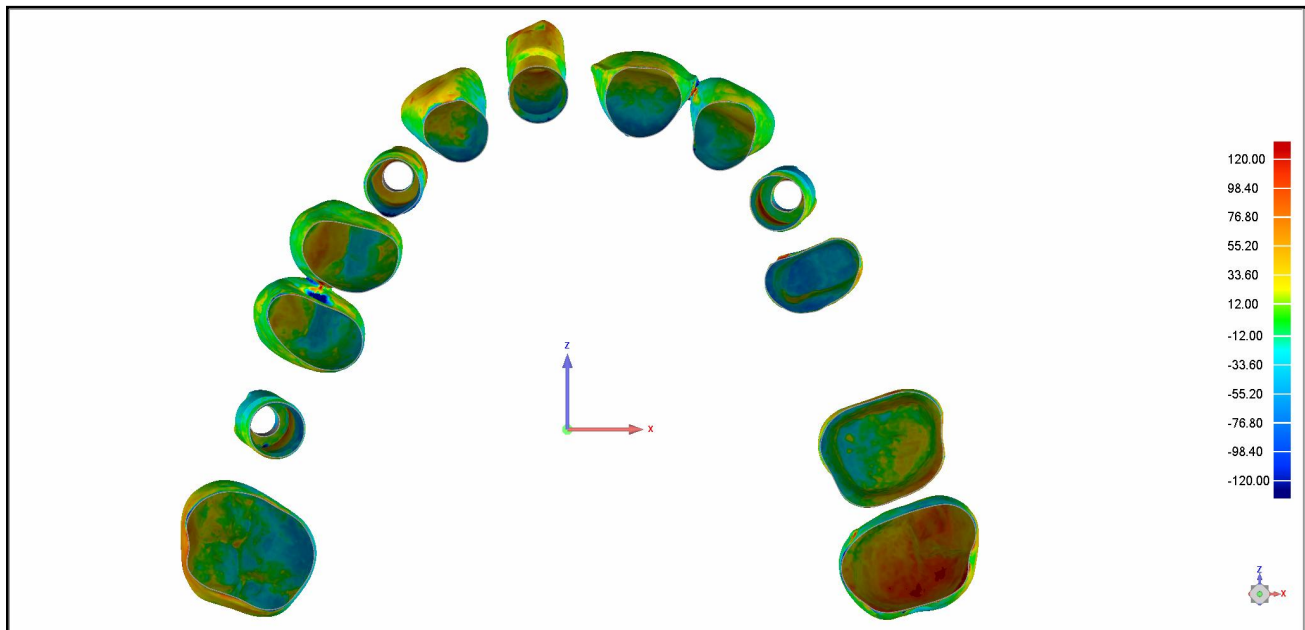

Predefinido: Atrás

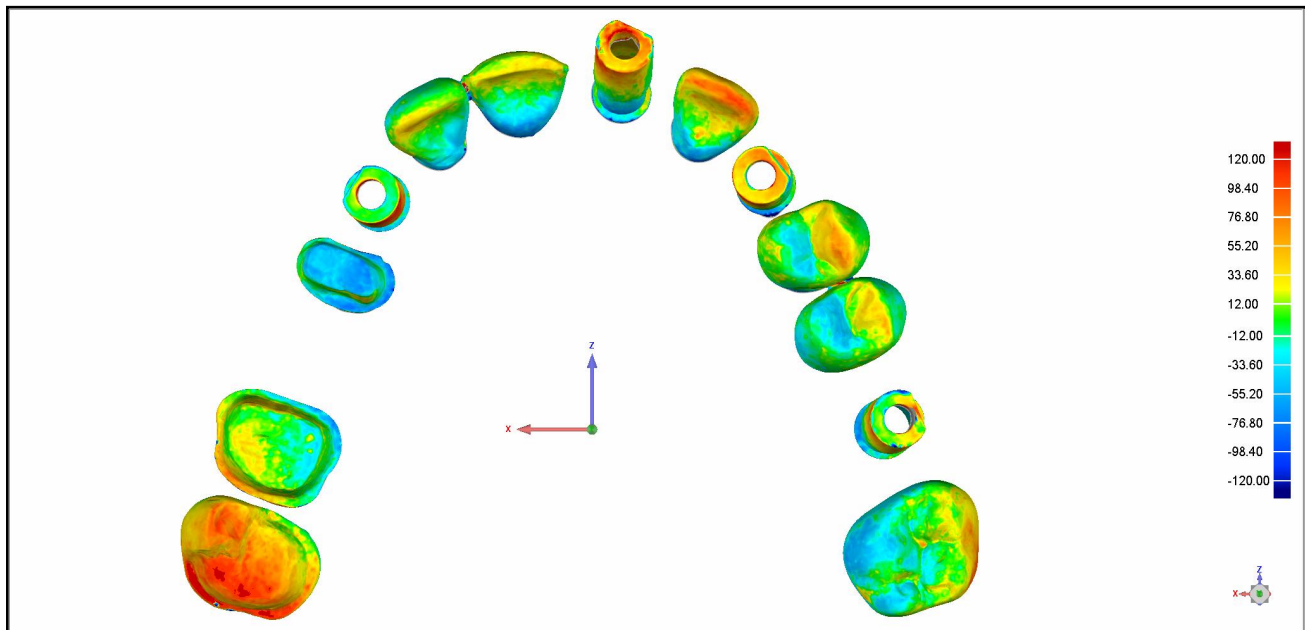

Predefinido: Izquierda

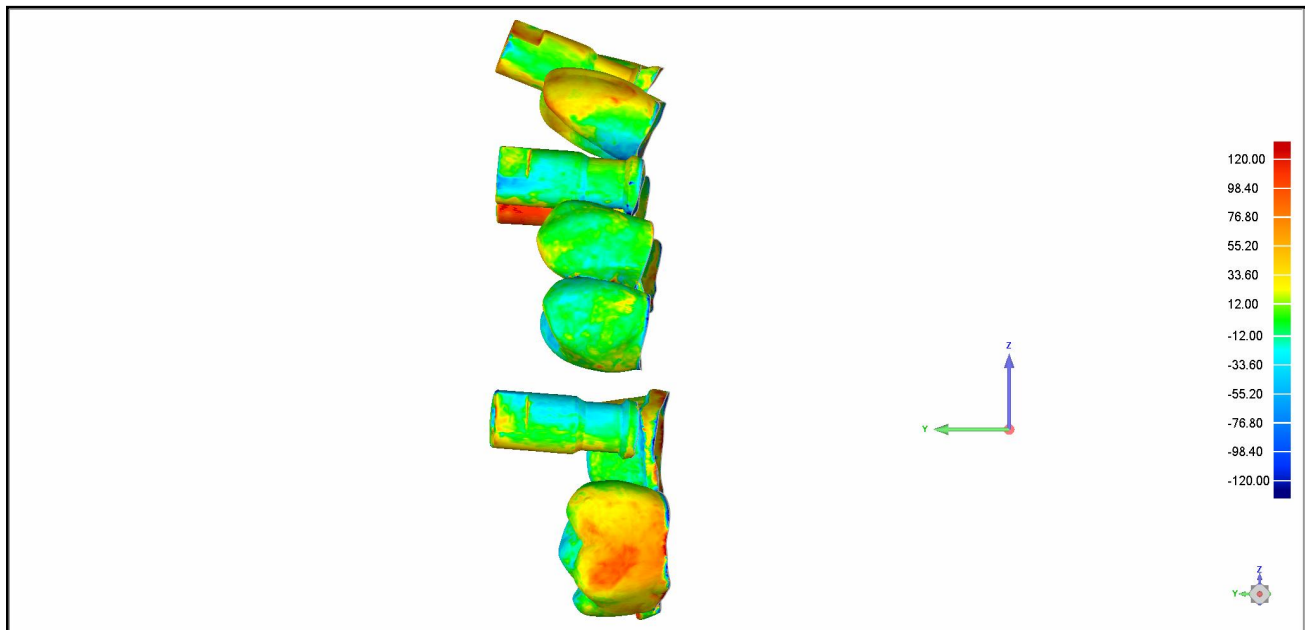

Predefinido: Derecha

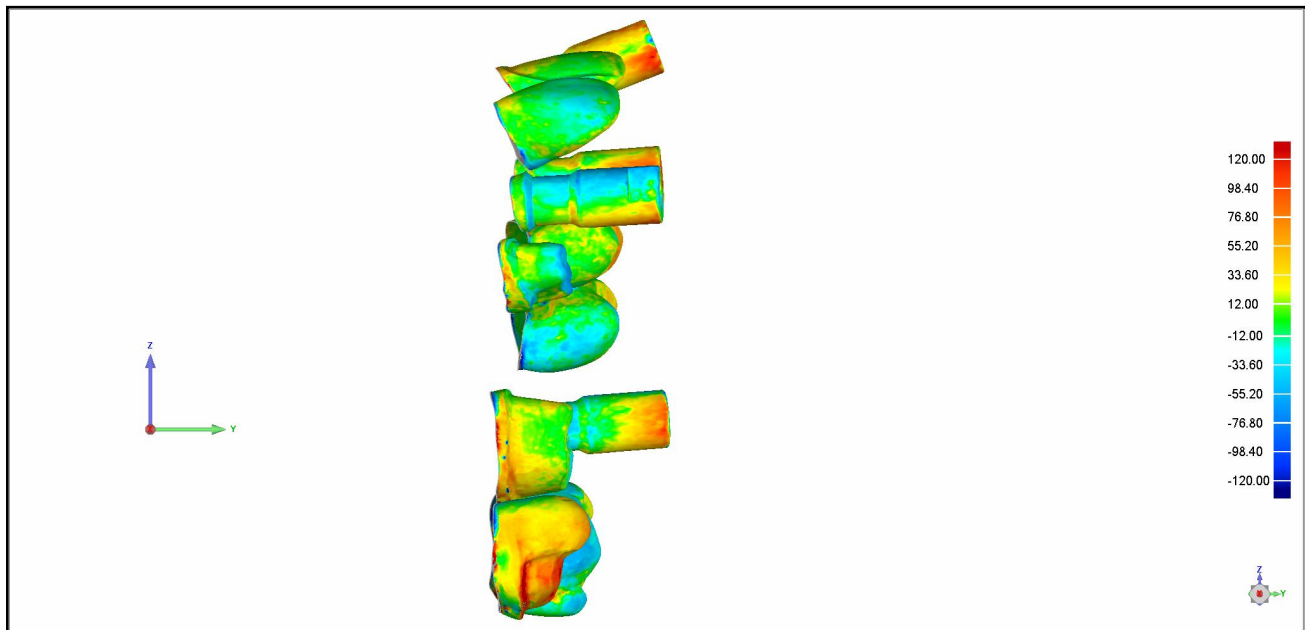

Predefinido: Superior

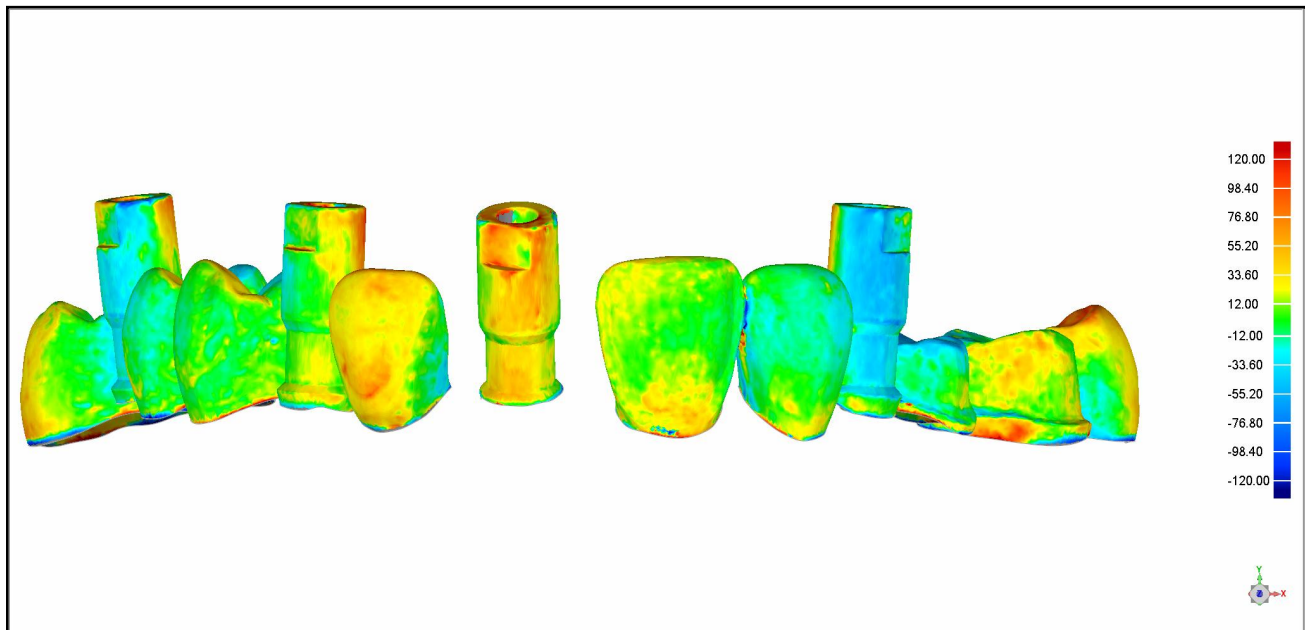

Predefinido: Inferior

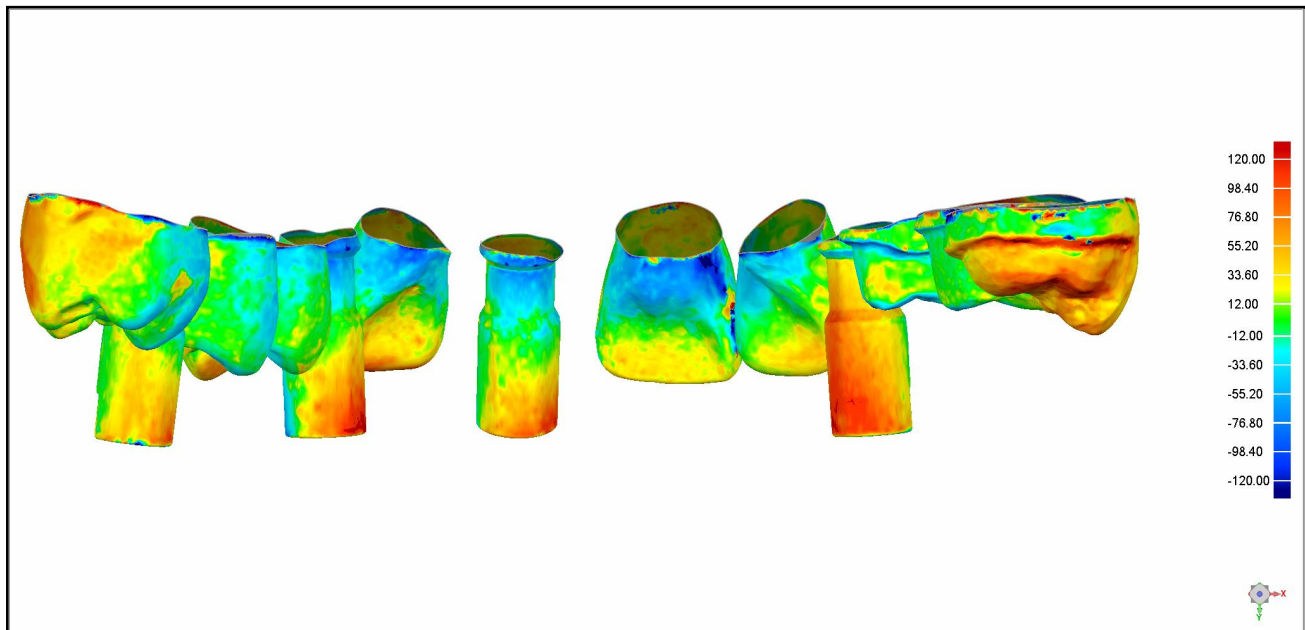



## Ajuste de ubicación: Desviaciones superior e inferior

Unidades: u

| Nombre         | Desv     | Estado | Superior Tol | Inferior Tol | Ref X    | Ref Y    | Ref Z     | Radio | Desv X  | Desv Y   | Desv Z  | Medido X | Medido Y | Medido Z  | Dir. proy. X | Dir. proy. Y | Dir. proy. Z |
|----------------|----------|--------|--------------|--------------|----------|----------|-----------|-------|---------|----------|---------|----------|----------|-----------|--------------|--------------|--------------|
| Desv. inferior | -2119.41 |        |              |              | 29715.55 | 29554.58 | -13882.37 | n/a   | -519.63 | -2053.68 | 65.52   | 29195.92 | 27500.90 | -13816.84 | 0.25         | 0.97         | -0.03        |
| Desv. superior | 1985.89  |        |              |              | 17773.89 | 38478.39 | 19616.81  | n/a   | -74.62  | -1936.70 | -432.87 | 17699.27 | 36541.69 | 19183.94  | -0.04        | -0.98        | -0.22        |
